# Supplementary material for: Copper-catalyzed desymmetric silylative-cyclization of 1,6-diynes for synthesis of spirocyclic compounds
Source: Royal Society of Chemistry journal article supplement (doi:10.1039/d3qo01731a), 2023-12-20
Supplement: d3qo01731a1.pdf [file d3qo01731a1.pdf]

# Supporting Information

## Copper-Catalyzed Desymmetric Silylative-Cyclization of 1,6-Diynes for Synthesis of Spirocyclic Compounds

Cui-Cui Shan,<sup>†</sup> Zi-Lu Wang,<sup>†</sup> and Yun-He Xu\*

University of Science and Technology of China, Hefei, Anhui, P. R. 230026

E-mail: xyh0709@ustc.edu.cn

## Table of Contents

|                                                                         |    |
|-------------------------------------------------------------------------|----|
| I. General Information .....                                            | 3  |
| II. Experimental Procedures .....                                       | 3  |
| III. Screening of chiral ligands.....                                   | 6  |
| IV. Characterization Data and Spectrums of Substrates and Products..... | 7  |
| V. Crystal Data for Compound 4i .....                                   | 85 |
| VI. References.....                                                     | 86 |

## I. General Information

Unless otherwise noted, all reagents and solvents were purchased from commercial suppliers and used without further purification (such as Shanghai Titan Scientific Co., Ltd., Energy Chemical Corporation, J&K Scientific, Sinopharm Chemical Reagent Corporation etc.).  $^1\text{H}$  NMR,  $^{13}\text{C}$  NMR and  $^{19}\text{F}$  NMR spectra were recorded at 25 °C on a Bruker Advance 400M NMR spectrometers ( $\text{CDCl}_3$  as solvent). Chemical shifts for  $^1\text{H}$  NMR spectra are reported as  $\delta$  in units of parts per million (ppm) downfield from  $\text{SiMe}_4$  ( $\delta$  0.00) and relative to the signal of  $\text{SiMe}_4$  ( $\delta$  0.00 singlet). Multiplicities were given as: s (singlet); d (doublet); t (triplet); q (quartet); dd (doublet of doublets); dt (doublet of triplets); m (multiplets) *etc.* Coupling constants are reported as a  $J$  value in Hz.  $^{13}\text{C}$  NMR spectra are reported as  $\delta$  in units of parts per million (ppm) downfield from  $\text{SiMe}_4$  ( $\delta$  0.00) and relative to the signal of chloroform- $d$  ( $\delta$  77.16 triplet). High resolution mass spectral analysis (HRMS) was performed on Waters XEVO G2 Q-TOF using electrospray ionization (ESI) (Waters Corporation). Flash chromatography was performed using 200-300 mesh silica gel with the indicated solvent system. Enantiomeric excesses of chiral compounds were determined by chiral high-performance liquid chromatography analyses which were performed on an Agilent 1260. Infinity equipped with a Daicel Chiralpak IB, IC-3 or Chiralcel OJ-3 column. Optical rotations were recorded on an Anton Paar MCP 200 polarimeter at 589 nm in chloroform. Single crystal X-ray diffraction data was collected on the Rigaku Oxford Diffraction (ROD) SuperNova Diffraction System.

## II. Experimental Procedures

Method A: Synthesis of oxindole-derived 1,6-diynes

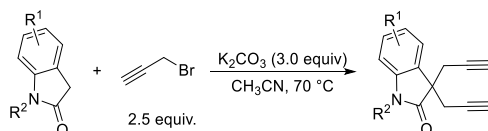

The 1,6-diynes were prepared according to the reported literature.<sup>1</sup>

3-Bromoprop-1-yne (5.0 mmol) was added dropwise to a mixture of *N*-protected 2-oxindole (2.0 mmol), potassium carbonate (6.0 mmol) in anhydrous acetonitrile (6.0 mL). Then, the mixture was stirred at 70 °C for 6 h. After completion, the reaction mixture was cooled to room temperature and ethyl acetate was added, then the precipitate was removed by filtration. The resultant solution was concentrated, and the crude products were purified by column chromatography to give the desired products.

Method B: Synthesis of 3,3-di(prop-2-yn-1-yl)benzofuran-2(3*H*)-one (**1ak**)

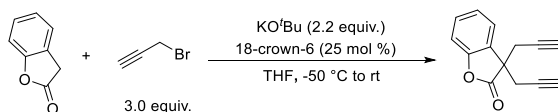

The 1,6-diyne **1ak** were prepared according to the reported literature.<sup>2</sup>

The mixture of benzofuran-2(3*H*)-one (5.0 mmol, 670.7 mg), 3-bromoprop-1-yne (15 mmol, 1.784 g) and 18-crown-6 (1.25 mmol, 646.8 mg) in THF (60 mL) was cooled to  $-50\text{ }^{\circ}\text{C}$ ,  $t\text{BuOK}$  (11 mmol, 1.234 g) was added slowly and the mixture was stirred at the same temperature for 1 h. Then, the mixture was warmed to room temperature and stirred for another 1 h. After completion, ethyl acetate was added, and the precipitate was removed by filtration. The resultant solution was concentrated, and the crude products were purified by column chromatography to give the desired product as white solid in 68% yield (0.715 g).

Synthesis of 4,4-di(prop-2-yn-1-yl)isochroman-3-one (**1a**)

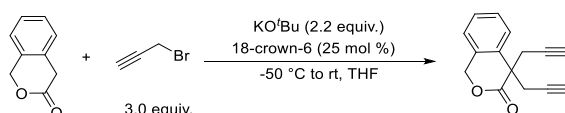

The mixture of isochroman-3-one (5.0 mmol, 740.8 mg), 3-bromoprop-1-yne (15 mmol, 1.784 g) and 18-crown-6 (1.25 mmol, 646.8 mg) in THF (60 mL) was cooled to  $-50\text{ }^{\circ}\text{C}$ ,  $t\text{BuOK}$  (11 mmol, 1.234 g) was added slowly and the mixture was stirred at the same temperature for 1 h. Then, the mixture was warmed to room temperature and stirred for another 1 h. After completion, ethyl acetate was added, and the precipitate was removed by filtration. The resultant solution was concentrated, and the crude product was purified by column chromatography to give the desired product as white solid in 20% yield (0.224 g).

Method C: Synthesis of substituted 1,4-dihydroisoquinolin-3(2*H*)-one (**1w**)

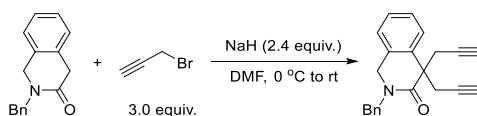

$\text{NaH}$  (60 wt% dispersion in mineral oil, 12 mmol, 172.8 mg) was added to the mixture of 2-benzyl-1,4-dihydroisoquinolin-3(2*H*)-one (5.0 mmol, 1.187 g) in DMF (0.75 M) at  $0\text{ }^{\circ}\text{C}$ . After 15 min, 3-bromoprop-1-yne (15 mmol, 1.784 g) was added. Then the mixture was allowed to warm up to room temperature and stirred at room temperature until complete consumption of the starting material (monitored by TLC). The reaction mixture was quenched with saturated  $\text{NH}_4\text{Cl}$  (5 mL), extracted with ethyl acetate (20 mL $\times$ 3). The combined organic layer was dried over anhydrous sodium sulfate, filtered and concentrated under reduced pressure. The crude residue was purified by flash chromatography and afforded the desired product as colorless crystal in 88% yield (1.376 g).

Method D: Synthesis of 1,1-di(prop-2-yn-1-yl)-3,4-dihydronaphthalen-2(1*H*)-one (**1s**)

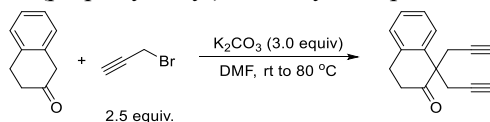

3,4-Dihydronaphthalen-2(1*H*)-one (5.0 mmol, 730.9 mg) was added to the mixture of  $\text{K}_2\text{CO}_3$  (15 mmol, 2.073 g) in DMF (25 mL) under argon atmosphere and the resulting solution was stirred at room temperature for 10 min. Then, a solution of 3-bromoprop-1-yne (12.5 mmol, 1.487 g) in DMF (5 mL) was added dropwise, the resultant mixture was stirred at  $80\text{ }^{\circ}\text{C}$  for 6 h. The reaction was quenched with saturated  $\text{NH}_4\text{Cl}$  (10 mL), extracted with ethyl acetate (20 mL $\times$ 3). The combined organic layer was dried over anhydrous sodium sulfate, filtered and concentrated under reduced pressure. The crude residue was purified by flash chromatography and afforded the desired product as yellow solid in 32% yield (354 mg).



### Method E: Synthesis of products **3**

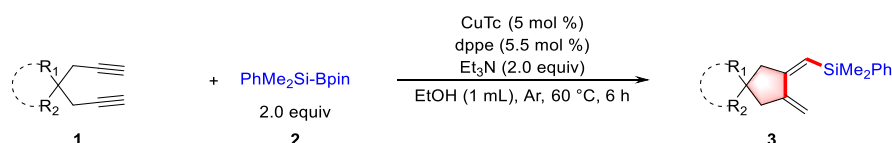

An oven dried 10-mL Schlenk tube equipped with a stirring bar, was charged with CuTc (0.01 mmol, 1.9 mg), dppe (0.011 mmol, 4.4 mg), EtOH (1.0 mL), Et<sub>3</sub>N (0.4 mmol, 40.5 mg) and 1,6-diynes (0.2 mmol), in sequence. The reaction mixture was stirred at room temperature for 15 min. Then Me<sub>2</sub>PhSi-Bpin (0.4 mmol, 104.9 mg) was added. The mixture was stirred at 60 °C for 6 h. Then, saturated NH<sub>4</sub>Cl (5 mL) was added and extracted with ethyl acetate (20 mL×3). The combined organic layer was dried over anhydrous sodium sulfate, filtered and concentrated under reduced pressure. The residue was purified by flash chromatography and afforded the desired product **3**.

### Method F: Synthesis of chiral products **4**

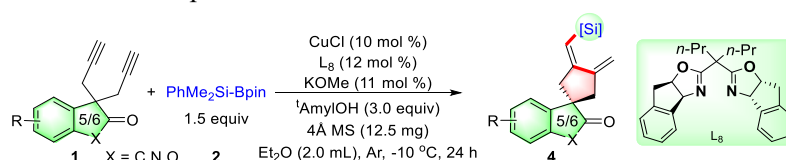

An oven dried 10-mL Schlenk tube equipped with a stirring bar, was charged with CuCl (0.02 mmol, 2.0 mg), KOMe (0.022 mmol, 1.5 mg), 4Å MS (12.5 mg), L<sub>8</sub> (0.024 mmol, 9.9 mg), Et<sub>2</sub>O (2.0 mL) and <sup>t</sup>AmylOH (0.6 mmol, 52.9 mg). The mixture was stirred for 1 h at room temperature. Then 1,6-diynes (0.2 mmol), Me<sub>2</sub>PhSi-Bpin (0.3 mmol, 78.7 mg) were added. The solution was stirred at –10 °C until the complete consumption of the starting material. Then, saturated NH<sub>4</sub>Cl (5 mL) was added and extracted with ethyl acetate (20 mL×3). The combined organic layer was dried over anhydrous sodium sulfate, filtered and concentrated under reduced pressure. The residue was purified by flash chromatography and afforded the desired product **4**.

### Gram-Scaled Experiment

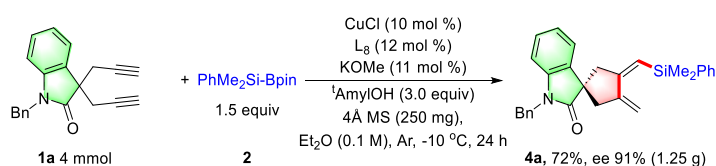

An oven dried 10-mL Schlenk tube equipped with a stirring bar, was charged with CuCl (0.4 mmol, 39.6 mg), KOMe (0.44 mmol, 30.9 mg), 4Å MS (250 mg), L<sub>8</sub> (0.48 mmol, 199 mg), Et<sub>2</sub>O (40 mL) and <sup>t</sup>AmylOH (12.0 mmol, 1.058 g). The mixture was stirred for 1 h at room temperature. Then **1a** (4.0 mmol, 1.197 g) and **2** (6.0 mmol, 1.573 g) were added. The solution was stirred at –10 °C for 24 h. Then, saturated NH<sub>4</sub>Cl (20 mL) was added and extracted with ethyl acetate (40 mL×3). The combined organic layer was dried over anhydrous sodium sulfate, filtered and concentrated under reduced pressure. The residue was purified by flash chromatography and afforded the desired product **4a** in 72% yield and 91% ee (1.25 g).

### Method G: Synthesis of product **5a**

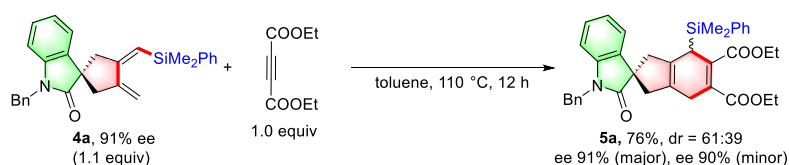

An oven dried 10-mL Schlenk tube equipped with a stirring bar, was charged with **4a** (0.22 mmol, 95.8 mg), diethyl but-2-ynedioate (0.2 mmol, 34.0 mg) and toluene (1.0 mL). The mixture was stirred at 110 °C for 12 h under argon atmosphere. Then, saturated  $\text{NH}_4\text{Cl}$  (5 mL) was added and extracted with ethyl acetate (20 mL $\times$ 3). The combined organic layer was dried over anhydrous sodium sulfate, filtered and concentrated under reduced pressure. The residue was purified by flash chromatography and afforded the desired product **5a** in 76% yield (91.9 mg, dr = 61:39).

#### Method H: Synthesis of product **6a**

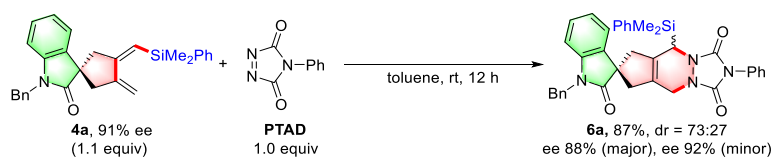

An oven dried 10-mL Schlenk tube equipped with a stirring bar, was charged with **4a** (0.22 mmol, 95.8 mg), PTAD (0.2 mmol, 34.0 mg) and toluene (1.0 mL). The mixture was stirred room temperature for 12 h under argon atmosphere. Then, saturated  $\text{NH}_4\text{Cl}$  (5 mL) was added and extracted with ethyl acetate (20 mL $\times$ 3). The combined organic layer was dried over anhydrous sodium sulfate, filtered and concentrated under reduced pressure. The residue was purified by flash chromatography and afforded the desired product **6a** in 87% yield (106.2 mg, dr = 27:73).

### III. Screening of ligands

Screening of nitrogen ligands for racemic reaction:

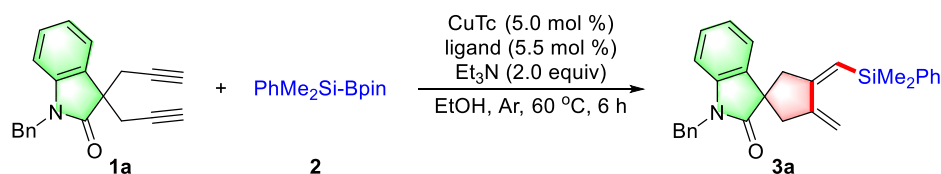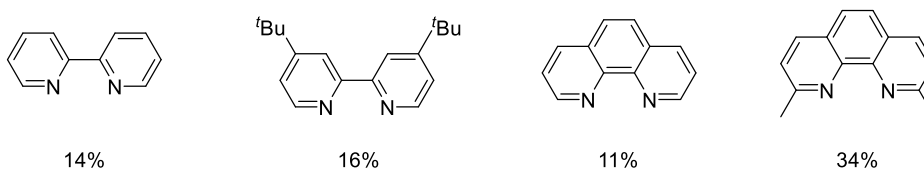

Screening of chiral ligands for asymmetric reaction:

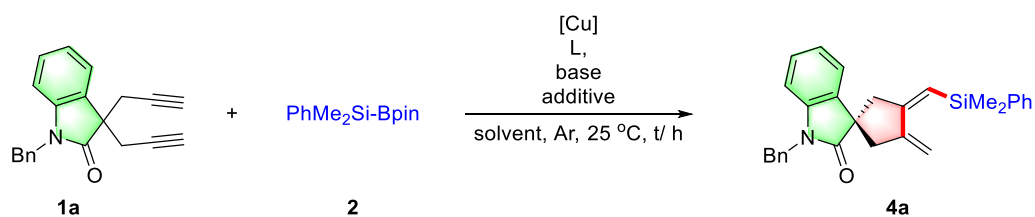

| entry | [Cu]<br>(10 mol %) | ligand<br>(mol %)    | base<br>(22 mol%)       | additive<br>(equiv) | solvent<br>(1 mL) | T/ $^\circ$ C | t/h | yield (%) <sup>b</sup> | ee % |
|-------|--------------------|----------------------|-------------------------|---------------------|-------------------|---------------|-----|------------------------|------|
| 1     | CuCl               | L <sub>1</sub> (12)  | NaO <sup>t</sup> Bu     | MeOH (2.0)          | THF               | 25            | 20  | 41                     | 66   |
| 2     | CuCl               | L <sub>2</sub> (12)  | NaO <sup>t</sup> Bu     | MeOH (2.0)          | THF               | 25            | 20  | 0                      | --   |
| 3     | CuCl               | L <sub>3</sub> (12)  | NaO <sup>t</sup> Bu     | MeOH (2.0)          | THF               | 25            | 20  | 20                     | 10   |
| 4     | CuCl               | L <sub>4</sub> (12)  | NaO <sup>t</sup> Bu     | MeOH (2.0)          | THF               | 25            | 20  | 24                     | 0    |
| 5     | CuCl               | L <sub>5</sub> (12)  | NaO <sup>t</sup> Bu     | MeOH (2.0)          | THF               | 25            | 20  | 19                     | 7    |
| 6     | CuCl               | L <sub>6</sub> (12)  | NaO <sup>t</sup> Bu     | MeOH (2.0)          | THF               | 25            | 20  | 32                     | 76   |
| 7     | CuCl               | L <sub>7</sub> (20)  | KO <sup>t</sup> Bu      | --                  | MeOH:THF (1:5)    | 25            | 20  | 52                     | 74   |
| 8     | CuCl               | L <sub>8</sub> (20)  | KO <sup>t</sup> Bu      | --                  | MeOH:THF (1:5)    | 25            | 20  | 58                     | 77   |
| 9     | CuCl               | L <sub>9</sub> (20)  | KO <sup>t</sup> Bu      | --                  | MeOH:THF (1:5)    | 25            | 20  | 47                     | 76   |
| 10    | CuBr               | L <sub>10</sub> (20) | KO <sup>t</sup> Bu      | --                  | MeOH:THF (1:5)    | 25            | 20  | 42                     | 66   |
| 11    | CuTc               | L <sub>11</sub> (20) | KO <sup>t</sup> Bu      | --                  | MeOH:THF (1:5)    | 25            | 20  | 37                     | 58   |
| 12    | CuCl               | L <sub>12</sub> (20) | KO <sup>t</sup> Bu (10) | --                  | MeOH:THF (1:5)    | 25            | 3   | 37                     | 72   |

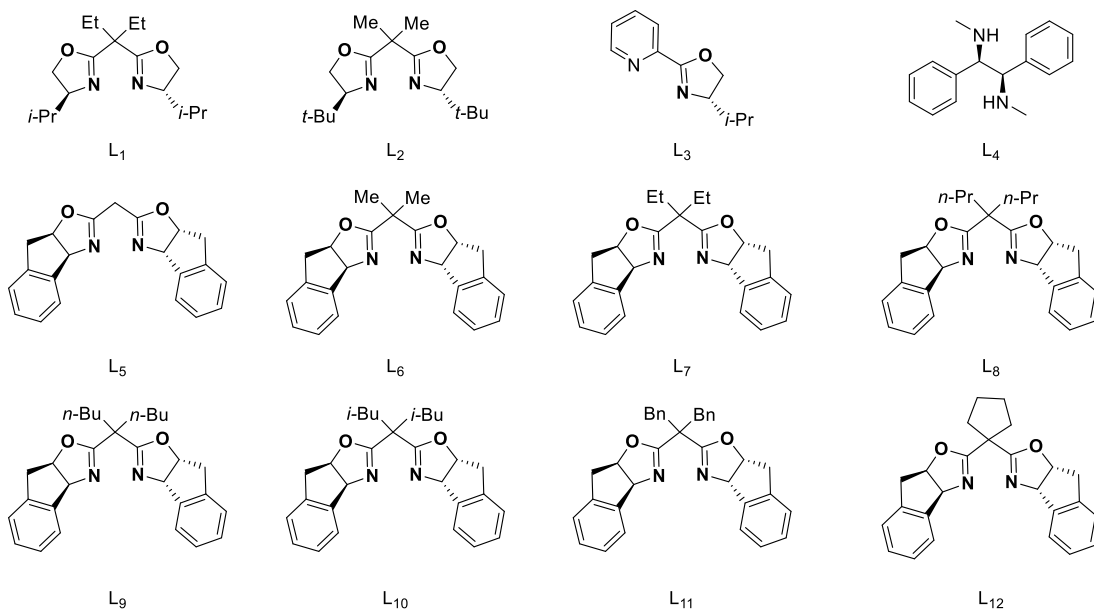

#### IV. Characterization Data and Spectrums of Substrates and Products

## 1-benzyl-5-methyl-3,3-di(prop-2-yn-1-yl)indolin-2-one (**1b**)

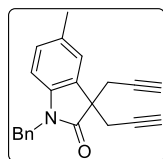

Prepared according to method A. The substrate **1b** was obtained as colorless crystal in 46% yield (0.287 g).

$^1\text{H NMR}$  (400 MHz,  $\text{CDCl}_3$ )  $\delta$  7.37 – 7.32 (m, 3H), 7.30 – 7.17 (m, 3H), 7.00 (ddd,  $J$  = 7.9, 1.7, 0.8 Hz, 1H), 6.62 (d,  $J$  = 7.9 Hz, 1H), 4.92 (s, 2H), 2.91 (dd,  $J$  = 16.8, 2.6 Hz, 2H), 2.68 (dd,  $J$  = 16.8, 2.6 Hz, 2H), 2.33 (s, 3H), 1.90 (t,  $J$  = 2.6 Hz, 2H).

$^{13}\text{C NMR}$  (101 MHz,  $\text{CDCl}_3$ )  $\delta$  177.4, 140.6, 135.8, 132.3, 130.3, 129.1, 128.7, 127.7, 127.6, 124.6, 109.0, 79.2, 71.3, 49.6, 44.1, 26.2, 21.4.

HRMS (ESI):  $m/z$  Calcd. for  $\text{C}_{22}\text{H}_{20}\text{NO}$   $[\text{M}+\text{H}]^+$ : 314.1545, found: 314.1541.

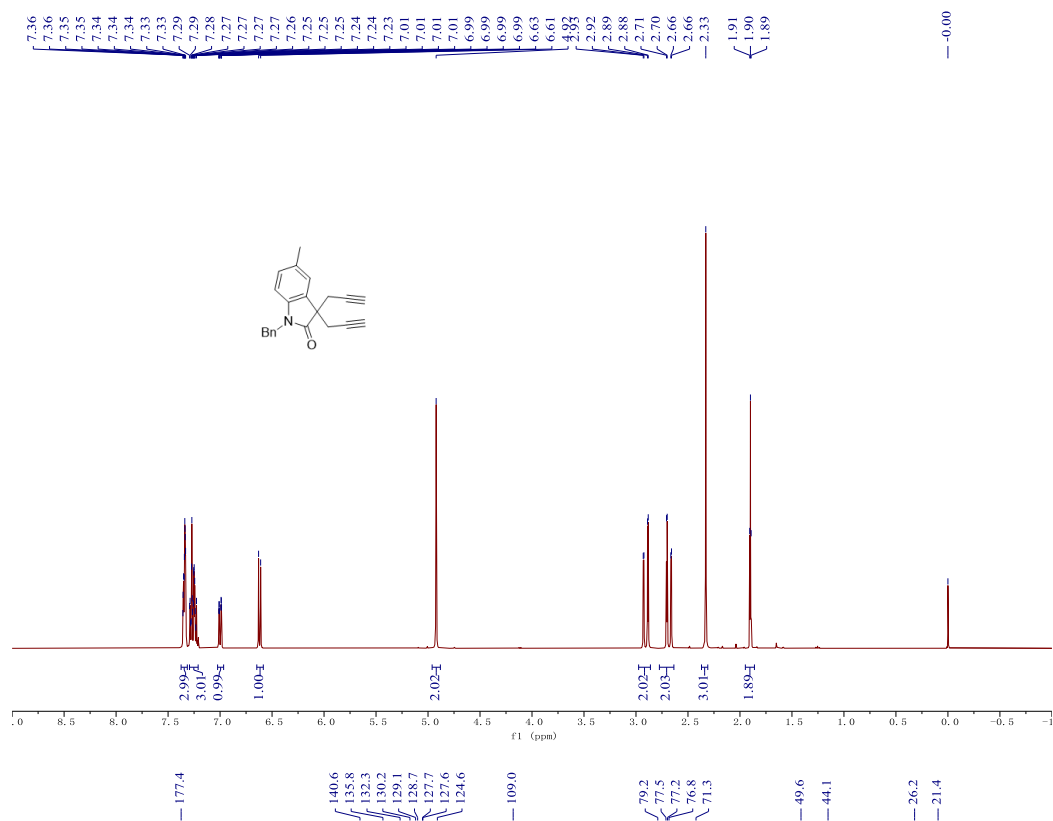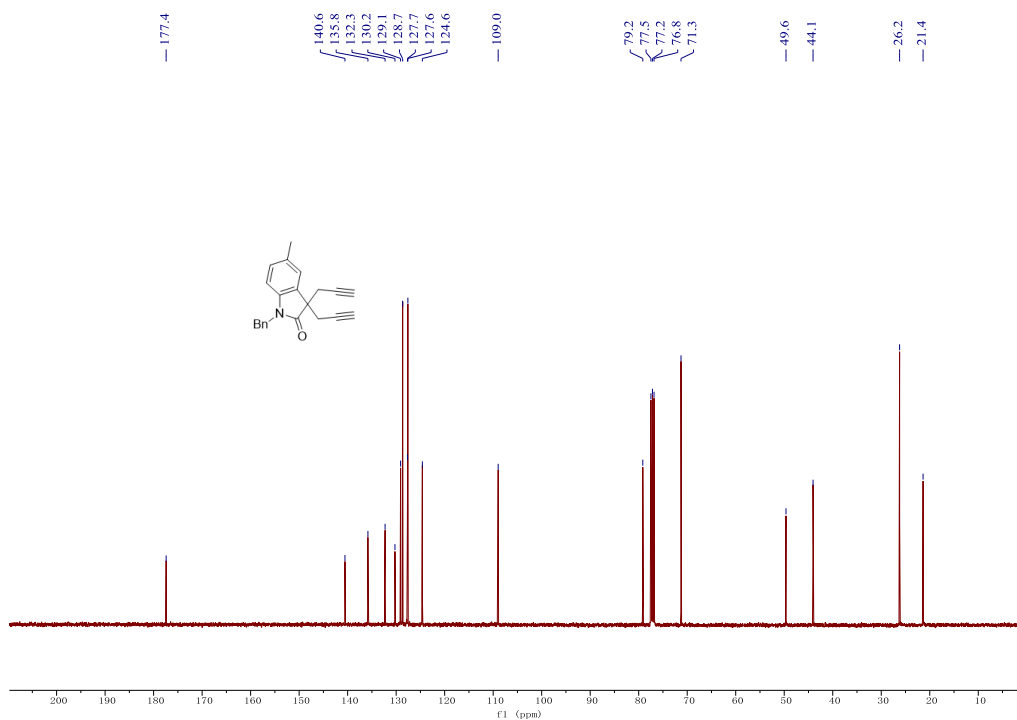

### 1-benzyl-5,7-dimethyl-3,3-di(prop-2-yn-1-yl)indolin-2-one (1c)

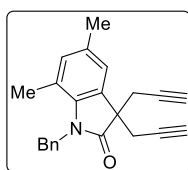

Prepared according to method A. The substrate **1c** was obtained as light red solid in 70% yield (0.457 g).

$^1\text{H NMR}$  (400 MHz,  $\text{CDCl}_3$ )  $\delta$  7.32 – 7.18 (m, 6H), 6.80 (td,  $J = 1.5, 0.7$  Hz, 1H), 5.19 (s, 2H), 2.91 (dd,  $J = 16.8, 2.6$  Hz, 2H), 2.70 (dd,  $J = 16.8, 2.6$  Hz, 2H), 2.31 (s, 3H), 2.23 (s, 3H), 1.97 (t,  $J = 2.6$  Hz, 2H).

$^{13}\text{C NMR}$  (101 MHz,  $\text{CDCl}_3$ )  $\delta$  178.5, 138.6, 137.7, 133.3, 132.3, 131.0, 128.8, 127.3, 126.1, 122.4, 119.5, 79.4, 71.3, 49.1, 45.3, 26.6, 21.1, 18.8.

HRMS (ESI):  $m/z$  Calcd. for  $\text{C}_{23}\text{H}_{22}\text{NO}$   $[\text{M}+\text{H}]^+$ : 328.1701, found: 328.1696.

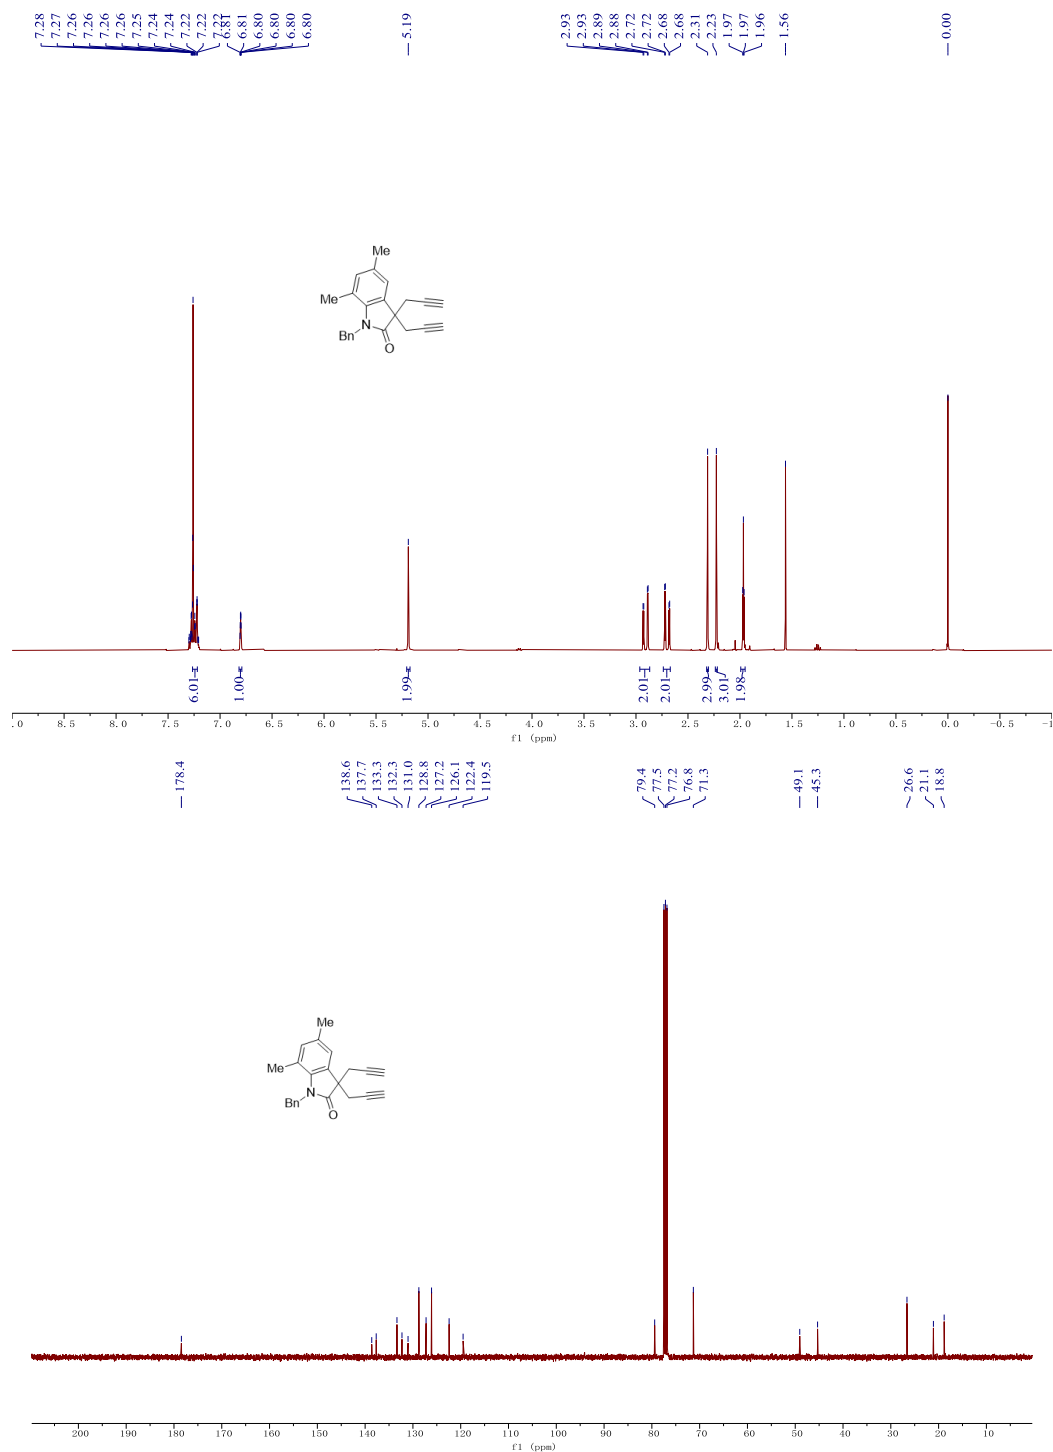

## 1-benzyl-7-bromo-3,3-di(prop-2-yn-1-yl)indolin-2-one (1g)

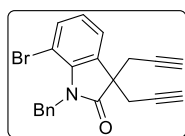

Prepared according to method A. The substrate **1g** was obtained as yellow solid in 67% yield (0.504 g).

$^1\text{H NMR}$  (400 MHz,  $\text{CDCl}_3$ )  $\delta$  7.51 (dd,  $J = 7.4, 1.2$  Hz, 1H), 7.41 (dd,  $J = 8.2, 1.2$  Hz, 1H), 7.34 – 7.18 (m, 5H), 6.97 (dd,  $J = 8.2, 7.4$  Hz, 1H), 5.42 (s, 2H), 2.92 (dd,  $J = 16.8, 2.6$  Hz, 2H), 2.70 (dd,  $J = 16.8, 2.6$  Hz, 2H) 1.95 (t,  $J = 2.6$  Hz, 2H).

$^{13}\text{C NMR}$  (101 MHz,  $\text{CDCl}_3$ )  $\delta$  178.3, 140.6, 137.4, 134.9, 133.4, 128.5, 127.2, 126.8, 124.1, 123.0, 102.6, 78.7, 71.8, 49.3, 44.9, 26.5.

**HRMS** (ESI):  $m/z$  Calcd. for  $\text{C}_{21}\text{H}_{17}\text{NOBr}$   $[\text{M}+\text{H}]^+$ : 378.0494, found: 378.0493.

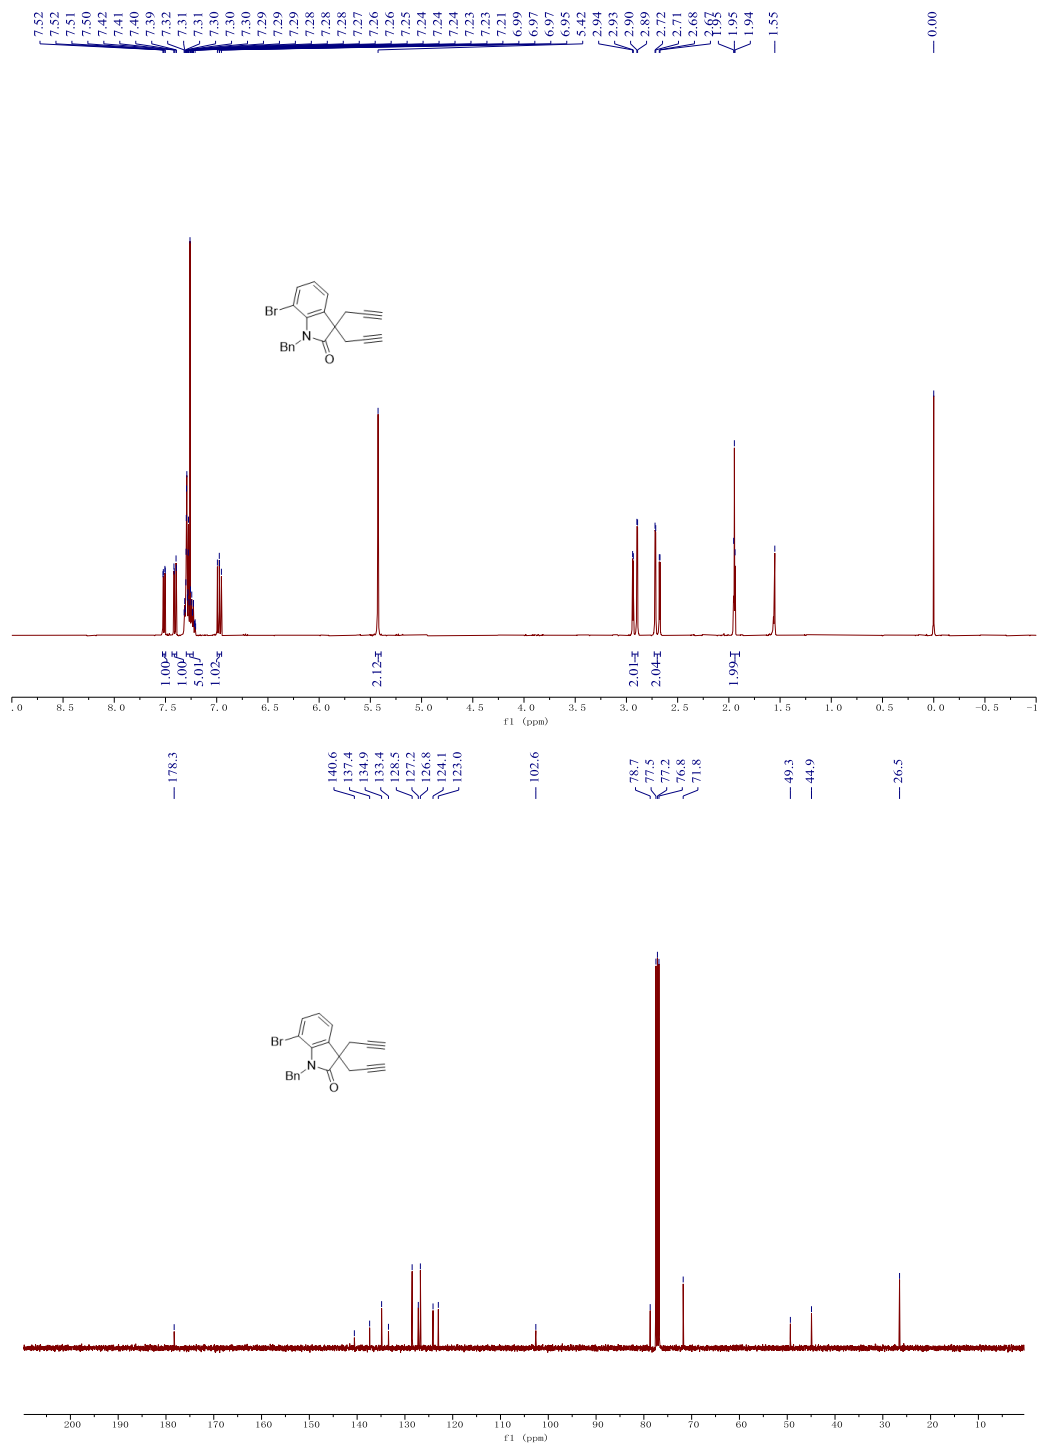

### 3,3-di(prop-2-yn-1-yl)-1-propylindolin-2-one (**1j**)

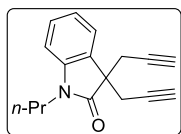

Prepared according to method A. The substrate **1j** was obtained as yellow solid in 78% yield (0.391 g).

<sup>1</sup>H NMR (400 MHz, CDCl<sub>3</sub>) δ 7.55 (ddd, *J* = 7.4, 1.3, 0.5 Hz, 1H), 7.32 (td, *J* = 7.7, 1.3 Hz, 1H), 7.10 (td, *J* = 7.6, 1.0 Hz, 1H), 6.89 (dt, *J* = 7.8, 0.8 Hz, 1H), 3.70 (t, *J* = 7.2 Hz, 2H), 2.88 (dd, *J* = 16.8, 2.6 Hz, 2H), 2.62 (dd, *J* = 16.8, 2.6 Hz, 2H), 1.90 (t, *J* = 2.7 Hz, 2H), 1.72 (h, *J* = 7.4 Hz, 2H), 0.98 (t, *J* = 7.4 Hz, 3H).

<sup>13</sup>C NMR (101 MHz, CDCl<sub>3</sub>) δ 177.3, 143.4, 130.4, 128.8, 123.9, 122.5, 108.5, 79.1, 71.1, 49.4, 41.9, 26.1, 20.9, 11.6.

HRMS (ESI): *m/z* Calcd. for C<sub>17</sub>H<sub>18</sub>NO [M+H]<sup>+</sup>: 252.1388, found: 252.1388.

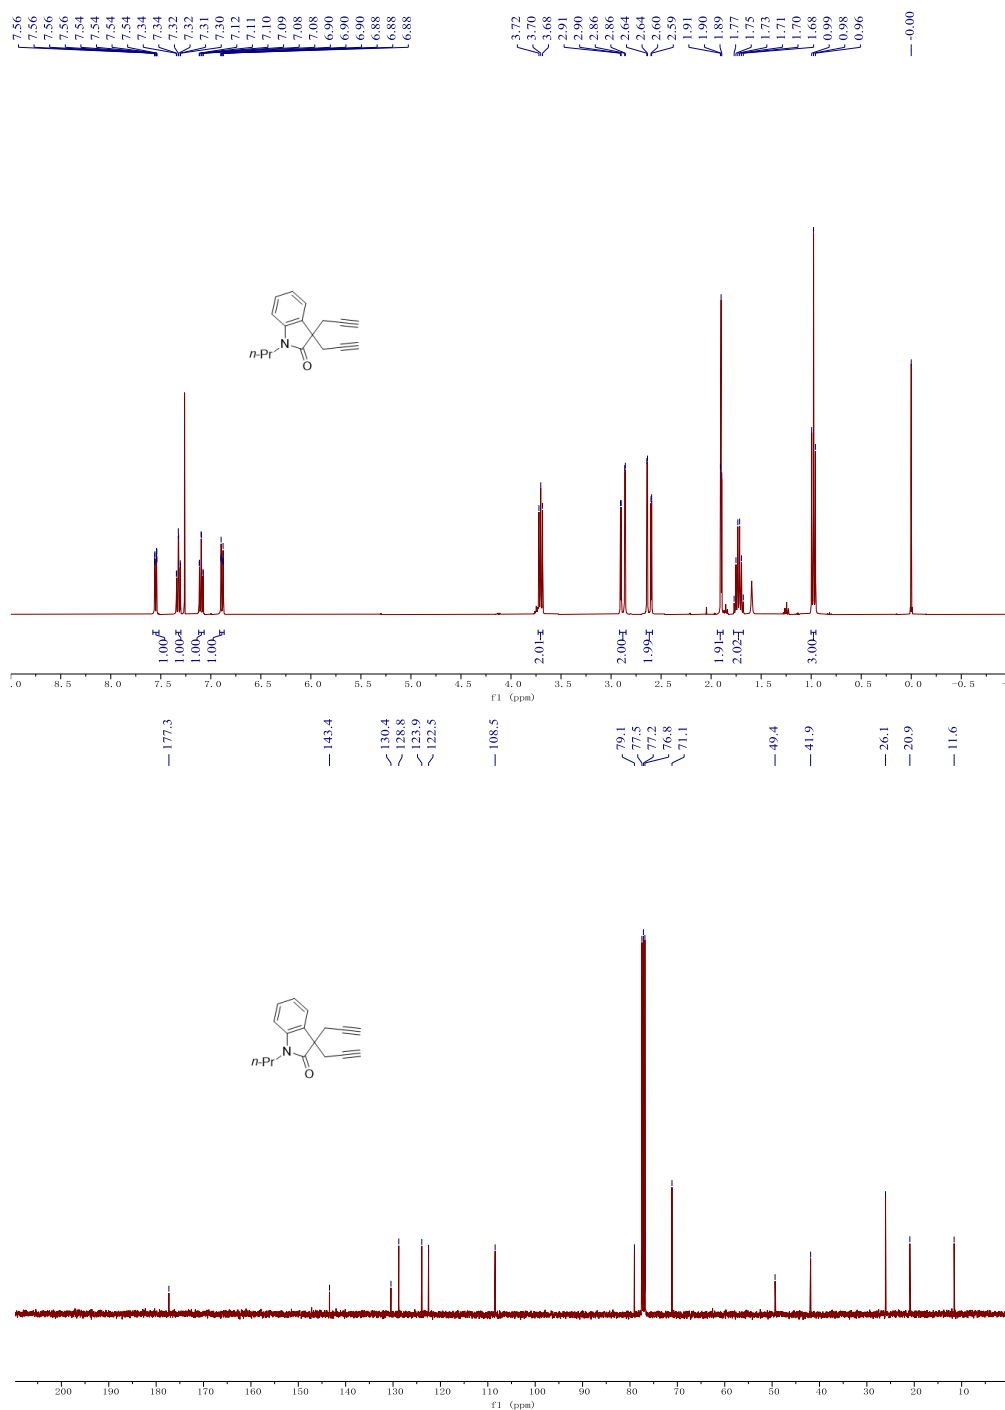

### 1-phenyl-3,3-di(prop-2-yn-1-yl)indolin-2-one (**1k**)

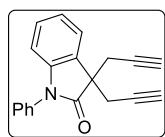

Prepared according to method A. The substrate **1k** was obtained as yellow solid in 72% yield (0.411 g).

$^1\text{H NMR}$  (400 MHz,  $\text{CDCl}_3$ )  $\delta$  7.62 (d,  $J = 7.4$  Hz, 1H), 7.56 – 7.48 (m, 2H), 7.46 – 7.39 (m, 3H), 7.27 (t,  $J = 7.4$  Hz, 1H), 7.15 (t,  $J = 7.6$  Hz, 1H), 6.84 (d,  $J = 7.5$  Hz, 1H), 2.97 (dd,  $J = 16.8, 2.6$  Hz, 2H), 2.76 (dd,  $J = 16.8, 2.6$  Hz, 2H), 1.97 (t,  $J = 2.6$  Hz, 2H).

$^{13}\text{C NMR}$  (101 MHz,  $\text{CDCl}_3$ )  $\delta$  176.9, 144.1, 134.5, 130.1, 129.8, 128.8, 128.4, 126.8, 124.0, 123.2, 109.4, 78.9, 71.3, 49.6, 26.4.

HRMS (ESI):  $m/z$  Calcd. for  $\text{C}_{20}\text{H}_{16}\text{NO}$   $[\text{M}+\text{H}]^+$ : 286.1232, found: 286.1230.

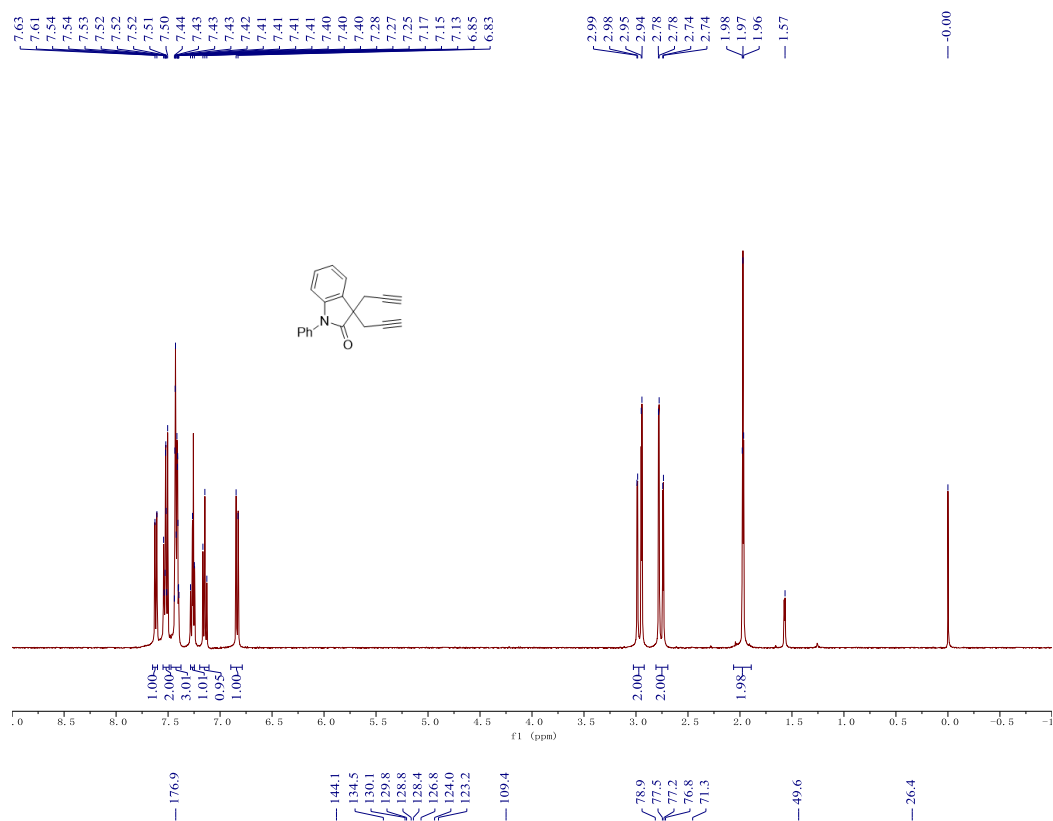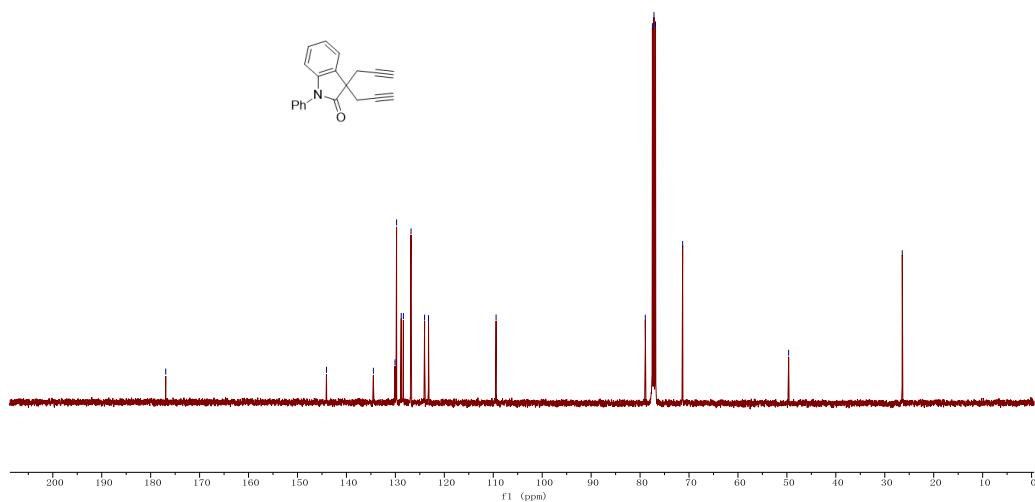



### 1-allyl-3,3-di(prop-2-yn-1-yl)indolin-2-one (**1m**)

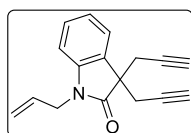

Prepared according to method A. The substrate **1m** was obtained as white plate crystal in 45% yield (0.225 g).

**<sup>1</sup>H NMR** (400 MHz, CDCl<sub>3</sub>) δ 7.55 (ddd, *J* = 7.4, 1.3, 0.6 Hz, 1H), 7.30 (td, *J* = 7.8, 1.3 Hz, 1H), 7.11 (td, *J* = 7.6, 1.0 Hz, 1H), 6.86 (dt, *J* = 7.8, 0.8 Hz, 1H), 5.83 (ddt, *J* = 17.2, 10.3, 5.1 Hz, 1H), 5.29 (dtd, *J* = 17.2, 1.8, 1.1 Hz, 1H), 5.20 (dq, *J* = 10.3, 1.5 Hz, 1H), 4.37 (dt, *J* = 5.1, 1.8 Hz, 2H), 2.90 (dd, *J* = 16.8, 2.6 Hz, 2H), 2.65 (dd, *J* = 16.8, 2.6 Hz, 2H), 1.91 (t, *J* = 2.6 Hz, 2H).

**<sup>13</sup>C NMR** (101 MHz, CDCl<sub>3</sub>) δ 177.1, 143.0, 131.3, 130.3, 128.8, 123.9, 122.7, 117.6, 109.1, 79.0, 71.2, 49.5, 42.6, 26.1.

**HRMS** (ESI): *m/z* Calcd. for C<sub>17</sub>H<sub>16</sub>NO [M+H]<sup>+</sup>: 250.1232, found: 250.1235.

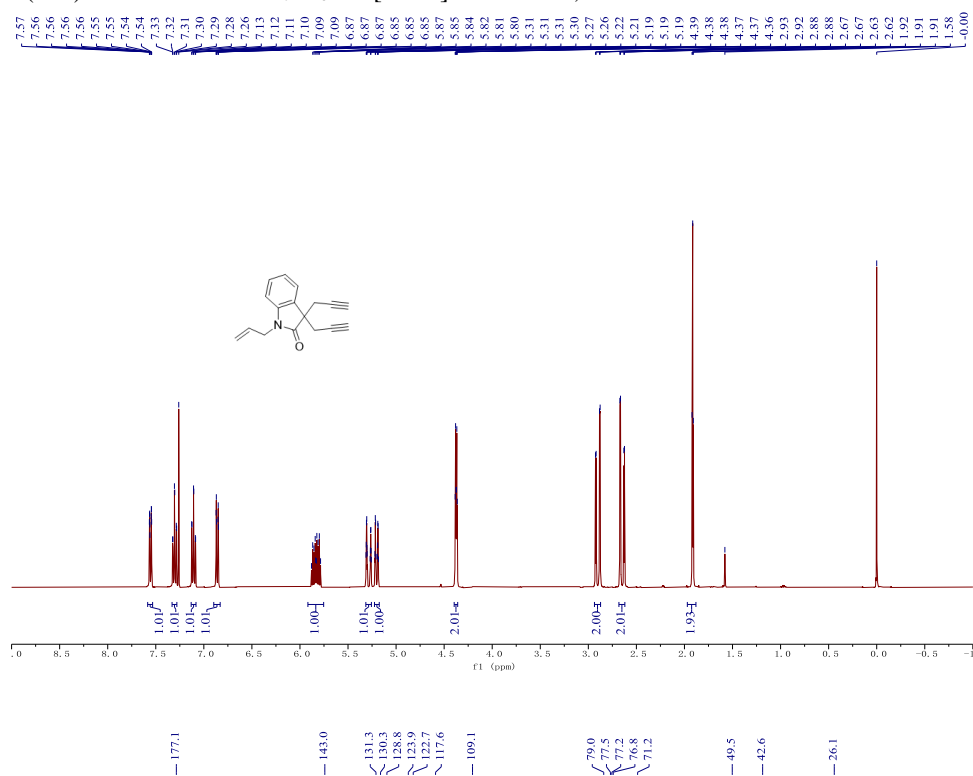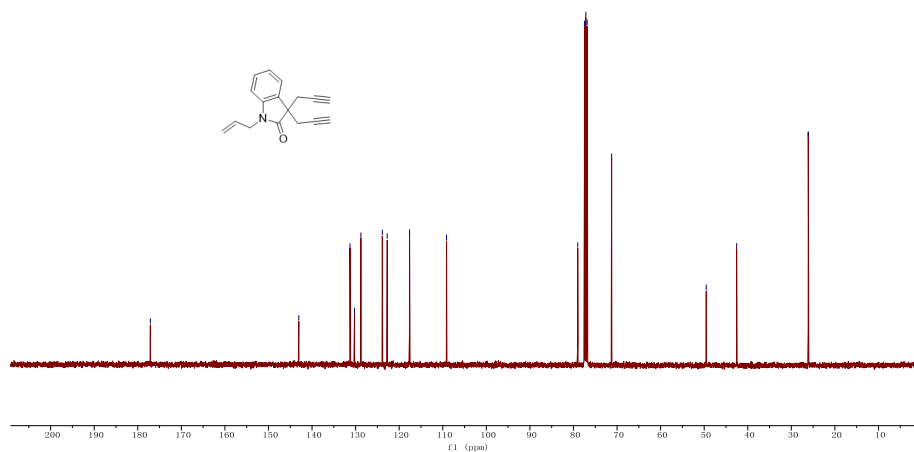

### 1-(but-2-yn-1-yl)-3,3-di(prop-2-yn-1-yl)indolin-2-one (**1n**)

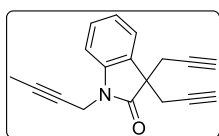

Prepared according to method **A**. The substrate **1n** was obtained as colorless crystal in 51% yield (0.266 g).

**<sup>1</sup>H NMR** (400 MHz, CDCl<sub>3</sub>) δ 7.57 (dd, *J* = 7.4, 1.2 Hz, 1H), 7.35 (td, *J* = 7.7, 1.2 Hz, 1H), 7.12 (td, *J* = 7.6, 1.1 Hz, 1H), 7.08 (dt, *J* = 7.9, 0.7 Hz, 1H), 4.46 (q, *J* = 2.4 Hz, 2H), 2.88 (dd, *J* = 16.6, 2.7 Hz, 2H), 2.63 (dd, *J* = 16.6, 2.7 Hz, 2H), 1.93 (t, *J* = 2.7 Hz, 2H), 1.75 (t, *J* = 2.5 Hz, 3H).

**<sup>13</sup>C NMR** (101 MHz, CDCl<sub>3</sub>) δ 176.5, 142.3, 130.2, 128.8, 123.8, 122.9, 109.3, 80.0, 78.8, 72.2, 71.3, 49.2, 29.9, 25.9, 3.6.

**HRMS** (ESI): *m/z* Calcd. for C<sub>18</sub>H<sub>16</sub>NO [M+H]<sup>+</sup>: 262.1232, found: 262.1234.

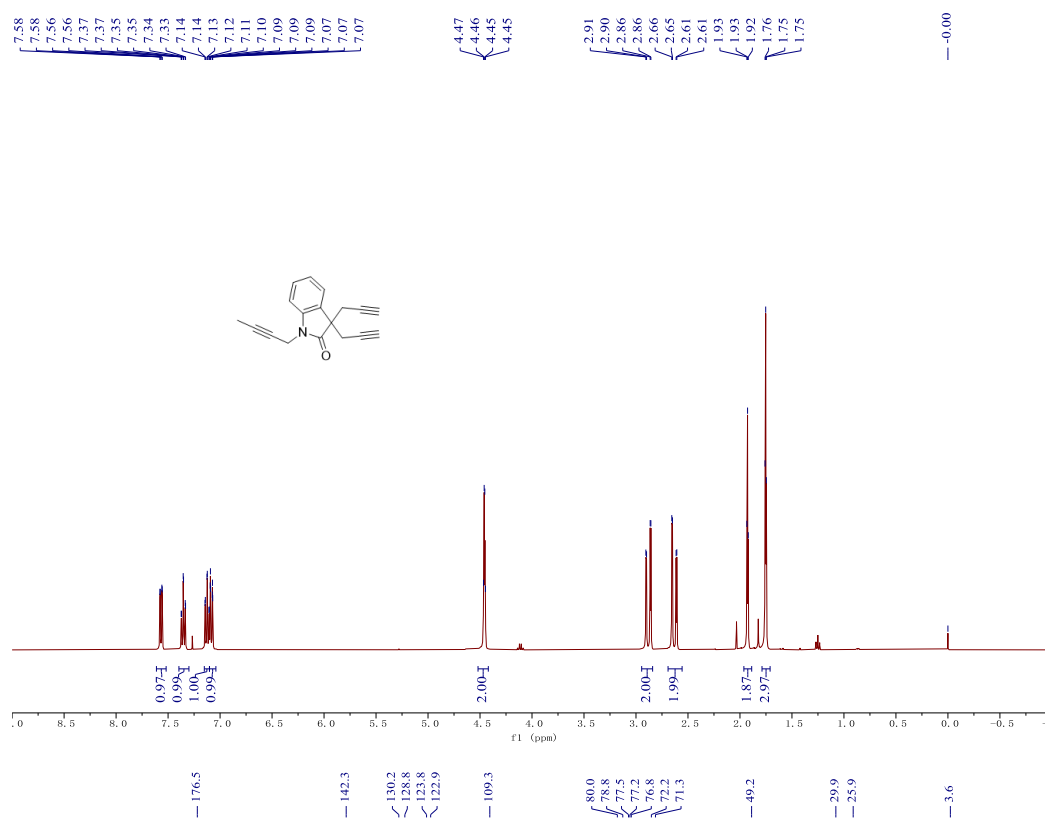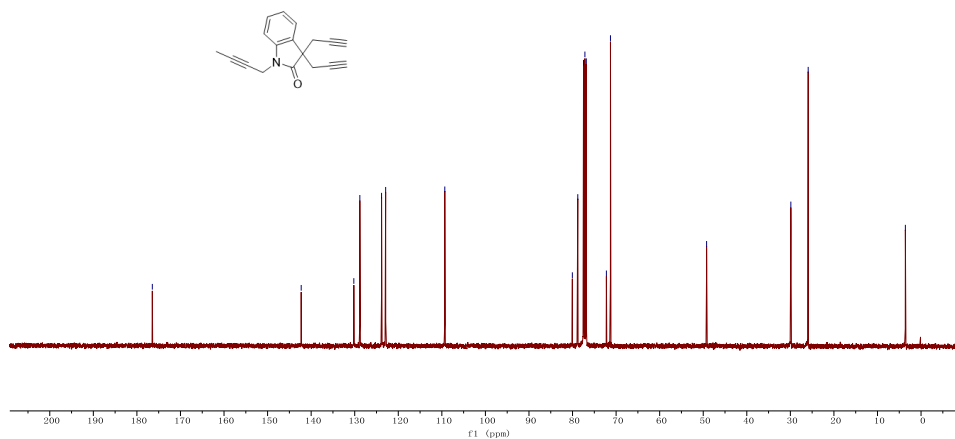

### 1,1-di(prop-2-yn-1-yl)-3,4-dihydronaphthalen-2(1H)-one (1s)

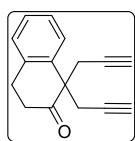

Prepared according to method **D**. The substrate **1s** was obtained as yellow solid in 32% yield (0.354 g).

**<sup>1</sup>H NMR** (400 MHz, CDCl<sub>3</sub>) δ 7.41 (dd, *J* = 7.7, 1.4 Hz, 1H), 7.32 (td, *J* = 7.7, 1.7 Hz, 1H), 7.27 (td, *J* = 7.3, 1.5 Hz, 1H), 7.22 (d, *J* = 6.6 Hz, 1H), 3.14 (dd, *J* = 7.9, 5.9 Hz, 2H), 2.86 (dd, *J* = 16.8, 2.6 Hz, 2H), 2.72 (dd, *J* = 16.8, 2.6 Hz, 2H), 2.78 (dd, *J* = 7.9, 5.9 Hz, 2H), 1.86 (t, *J* = 2.6 Hz, 2H).

**<sup>13</sup>C NMR** (101 MHz, CDCl<sub>3</sub>) δ 211.5, 137.8, 137.2, 128.3, 127.4, 127.1, 127.0, 80.0, 71.4, 54.1, 39.6, 29.1, 28.1.

**HRMS (ESI):** *m/z* Calcd. for C<sub>16</sub>H<sub>15</sub>O [M+H]<sup>+</sup>: 223.1123, found: 223.1123.

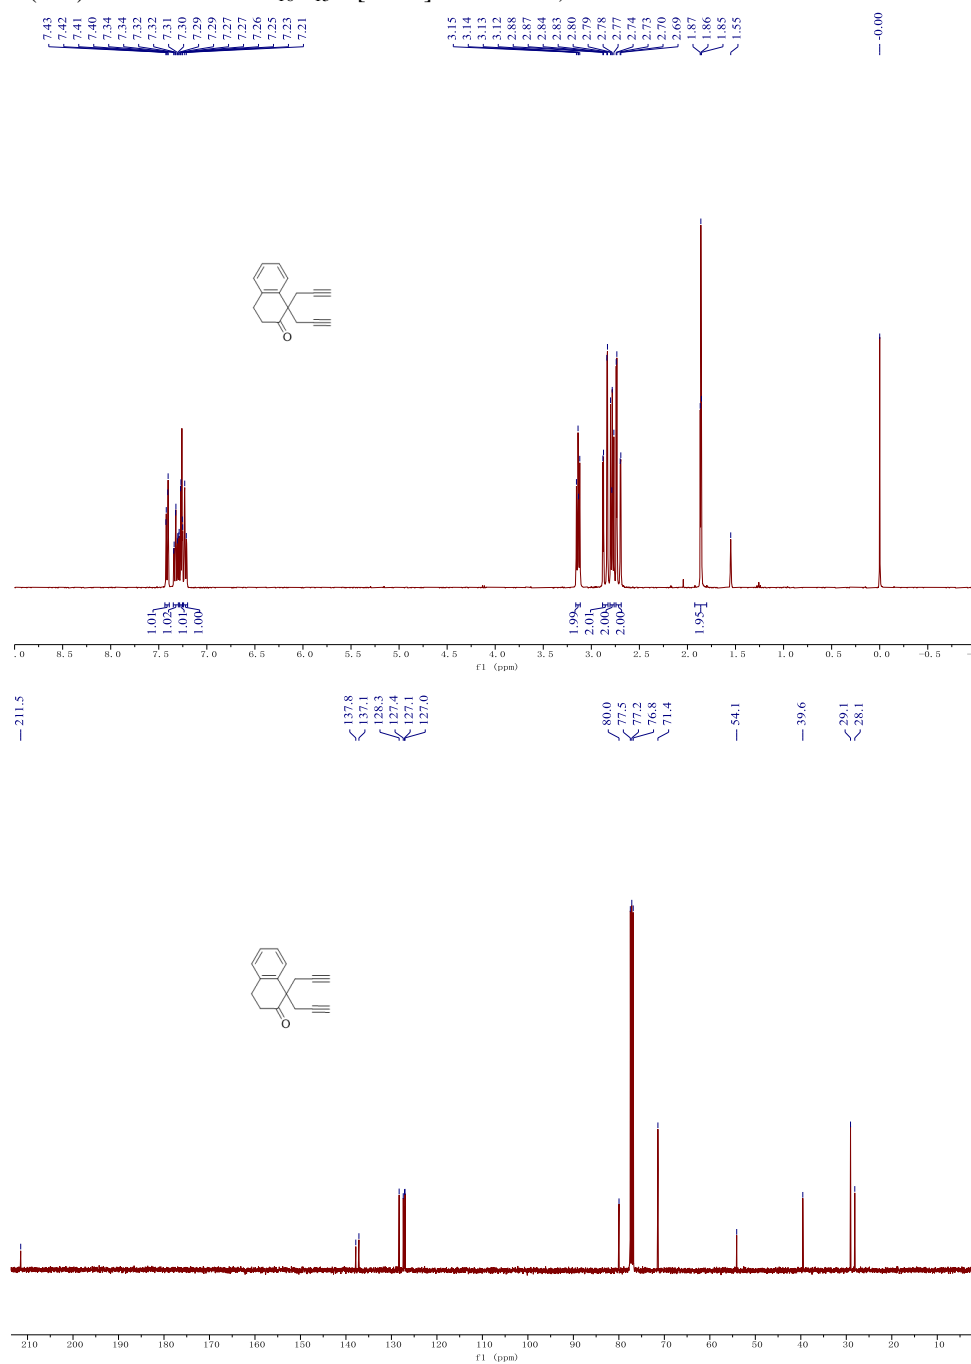

## 2-benzyl-4,4-di(prop-2-yn-1-yl)-1,4-dihydroisoquinolin-3(2H)-one (1w)

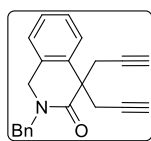

Prepared according to method C. The substrate **1w** was obtained as colorless crystal in 88% yield (1.376 g).

**<sup>1</sup>H NMR** (400 MHz, CDCl<sub>3</sub>) δ 7.43 (dd, *J* = 7.9, 1.3 Hz, 1H), 7.40 – 7.22 (m, 7H), 7.10 – 7.03 (m, 1H), 4.86 (s, 2H), 4.46 (s, 2H), 3.11 (dd, *J* = 16.4, 2.7 Hz, 2H), 2.77 (dd, *J* = 16.4, 2.7 Hz, 2H), 1.82 (t, *J* = 2.6 Hz, 2H).

**<sup>13</sup>C NMR** (101 MHz, CDCl<sub>3</sub>) δ 170.3, 136.6, 135.2, 131.1, 128.7, 128.3, 127.7, 127.7, 127.3, 126.4, 125.3, 80.2, 71.1, 50.9, 49.8, 49.3, 29.4.

**HRMS** (ESI): *m/z* Calcd. for C<sub>22</sub>H<sub>20</sub>NO [M+H]<sup>+</sup>: 314.1545, found: 314.1541.

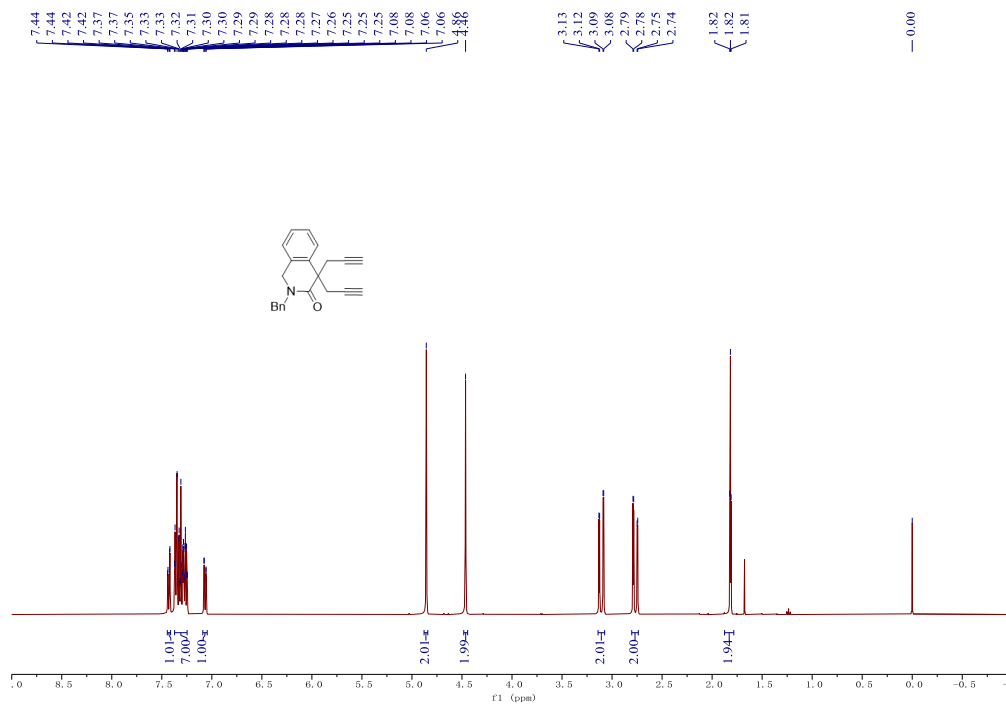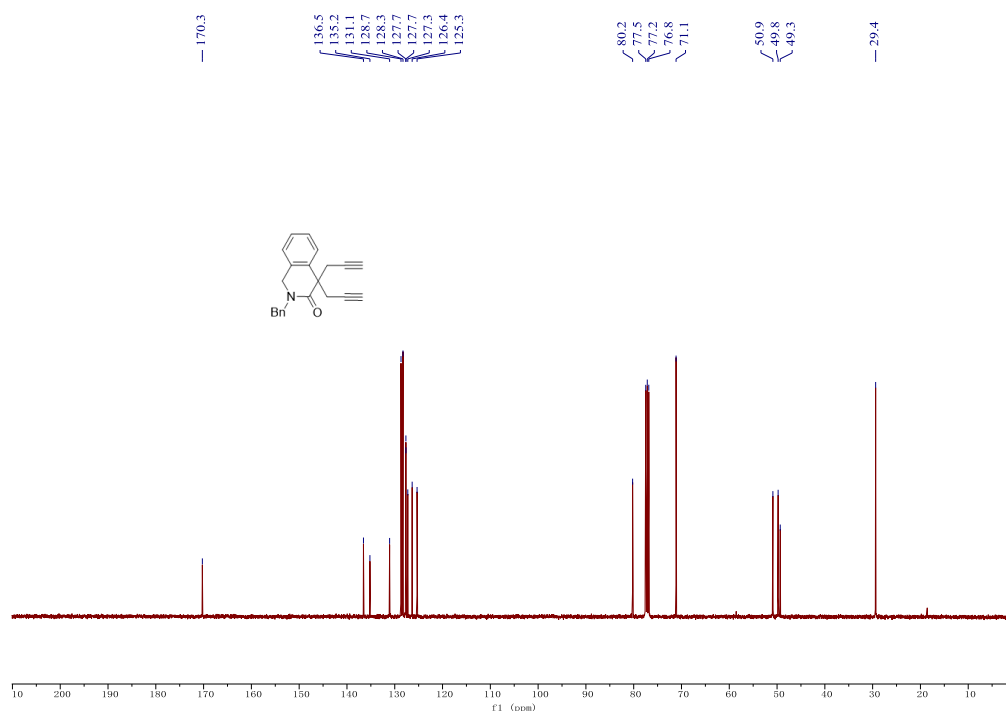

### 3,3-di(prop-2-yn-1-yl)benzofuran-2(3H)-one (1ak)

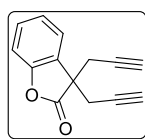

Prepared according to method **B**. The substrate **1ak** was obtained as white solid in 68% yield (0.715 g).

**<sup>1</sup>H NMR** (400 MHz, CDCl<sub>3</sub>) δ 7.53 (ddd, *J* = 7.5, 1.4, 0.5 Hz, 1H), 7.38 (td, *J* = 7.8, 1.4 Hz, 1H), 7.21 (td, *J* = 7.6, 1.0 Hz, 1H), 7.16 (ddd, *J* = 8.0, 1.1, 0.6 Hz, 1H), 2.94 (dd, *J* = 16.8, 2.6 Hz, 2H), 2.76 (dd, *J* = 16.8, 2.6 Hz, 2H), 2.02 (t, *J* = 2.7 Hz, 2H).

**<sup>13</sup>C NMR** (101 MHz, CDCl<sub>3</sub>) δ 177.1, 153.3, 129.8, 128.4, 124.6, 124.2, 110.9, 77.7, 72.3, 49.4, 26.8.

**HRMS** (ESI): *m/z* Calcd. for C<sub>14</sub>H<sub>11</sub>O<sub>2</sub> [M+H]<sup>+</sup>: 211.0759, found: 211.0753.

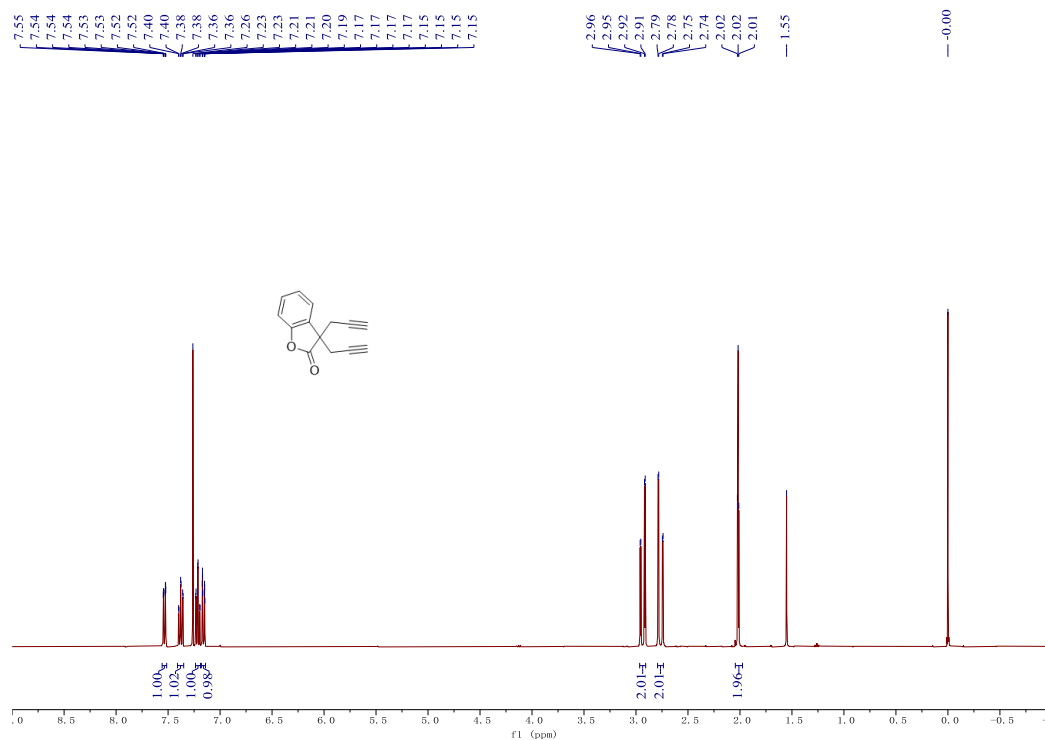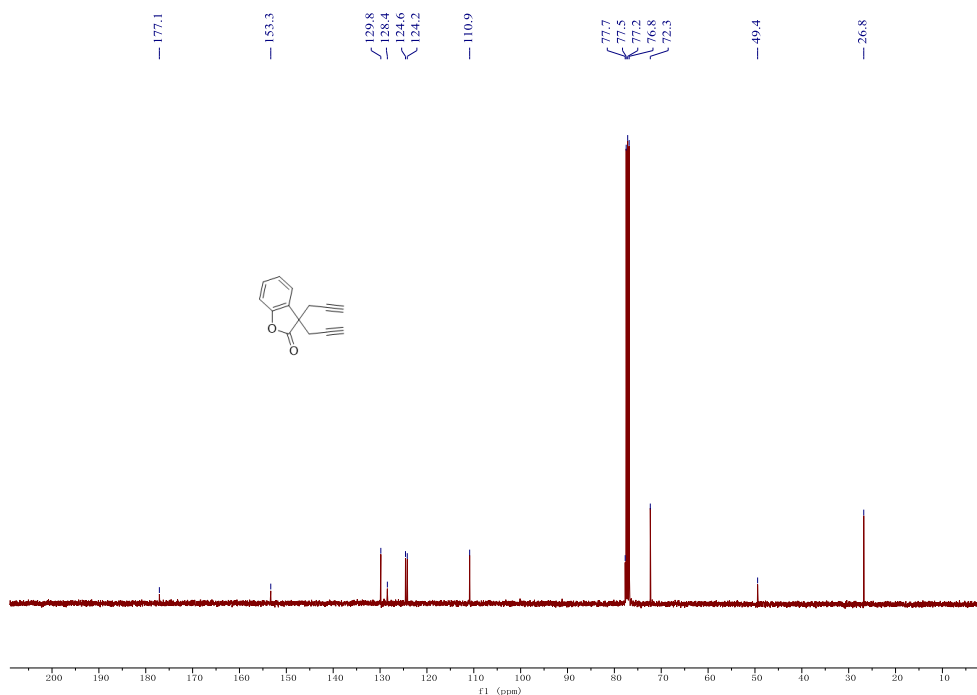

### 4,4-di(prop-2-yn-1-yl)isochroman-3-one (1a1)

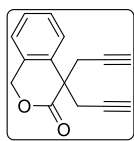

Prepared according to method **B**. The substrate **1a1** was obtained as white solid in 20% yield (0.224 g).

$^1\text{H NMR}$  (400 MHz,  $\text{CDCl}_3$ )  $\delta$  7.52 (dd,  $J = 8.1, 1.1$  Hz, 1H), 7.43 (tdd,  $J = 7.8, 1.4, 0.7$  Hz, 1H), 7.37 (td,  $J = 7.4, 1.4$  Hz, 1H), 7.19 (ddq,  $J = 7.5, 1.6, 0.8$  Hz, 1H), 5.49 (s, 2H), 3.02 (dd,  $J = 16.8, 2.6$  Hz, 2H), 2.90 (dd,  $J = 16.8, 2.6$  Hz, 2H), 1.97 (t,  $J = 2.7$  Hz, 2H).

$^{13}\text{C NMR}$  (101 MHz,  $\text{CDCl}_3$ )  $\delta$  171.6, 133.7, 130.8, 128.7, 128.0, 126.5, 124.4, 79.0, 72.3, 69.7, 49.2, 27.5.

HRMS (ESI):  $m/z$  Calcd. for  $\text{C}_{15}\text{H}_{13}\text{O}_2$   $[\text{M}+\text{H}]^+$ : 225.0916, found: 225.0913.

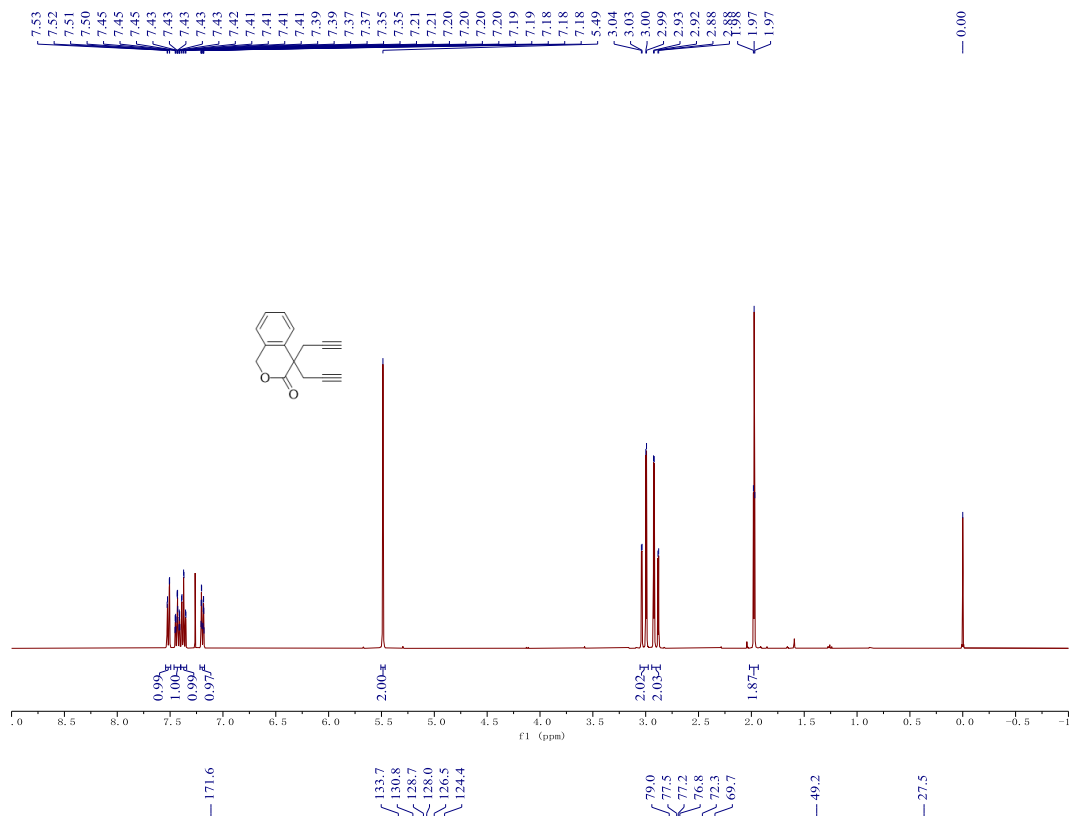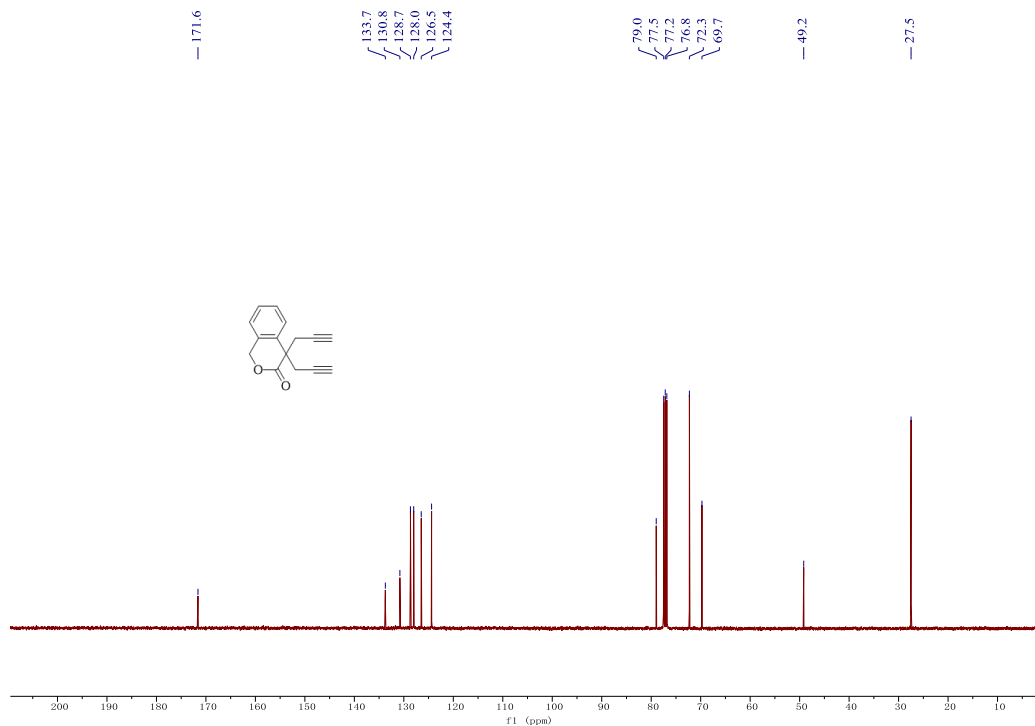

**(Z)-1'-benzyl-3-((dimethyl(phenyl)silyl)methylene)-4-methylenespiro[cyclopentane-1,3'-indolin]-2'-one (3a)**

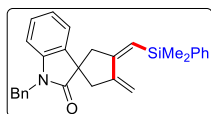

Prepared according to method E. The product **3a** was obtained as yellow oil in 77% yield (67.1 mg).

$^1\text{H NMR}$  (400 MHz,  $\text{CDCl}_3$ )  $\delta$  7.65 – 7.58 (m, 2H), 7.41 – 7.30 (m, 3H), 7.30 – 7.13 (m, 6H), 7.11 (td,  $J = 7.7, 1.3$  Hz, 1H), 6.94 (td,  $J = 7.6, 1.0$  Hz, 1H), 6.70 (d,  $J = 7.7$  Hz, 1H), 5.81 (dd,  $J = 2.6, 1.5$  Hz, 1H), 5.33 (dd,  $J = 3.0, 1.4$  Hz, 1H), 5.01 (dd,  $J = 2.7, 1.4$  Hz, 1H), 4.91 (s, 2H), 3.35 (dd,  $J = 15.8, 2.7$  Hz, 1H), 3.19 (dt,  $J = 15.3, 2.8$  Hz, 1H), 2.64 (dt,  $J = 15.8, 1.9$  Hz, 1H), 2.53 (dd,  $J = 15.1, 1.9$  Hz, 1H), 0.47 (s, 6H).

$^{13}\text{C NMR}$  (101 MHz,  $\text{CDCl}_3$ )  $\delta$  179.5, 156.4, 145.9, 141.7, 139.2, 136.0, 135.2, 133.9, 129.1, 128.9, 128.0, 127.8, 127.7, 127.3, 122.7, 122.7, 122.2, 112.6, 109.1, 50.8, 49.3, 45.5, 44.0, -1.3, -1.5.

**HRMS** (ESI):  $m/z$  Calcd. for  $\text{C}_{29}\text{H}_{30}\text{NOSi}$   $[\text{M}+\text{H}]^+$ : 436.2097, found: 436.2097.

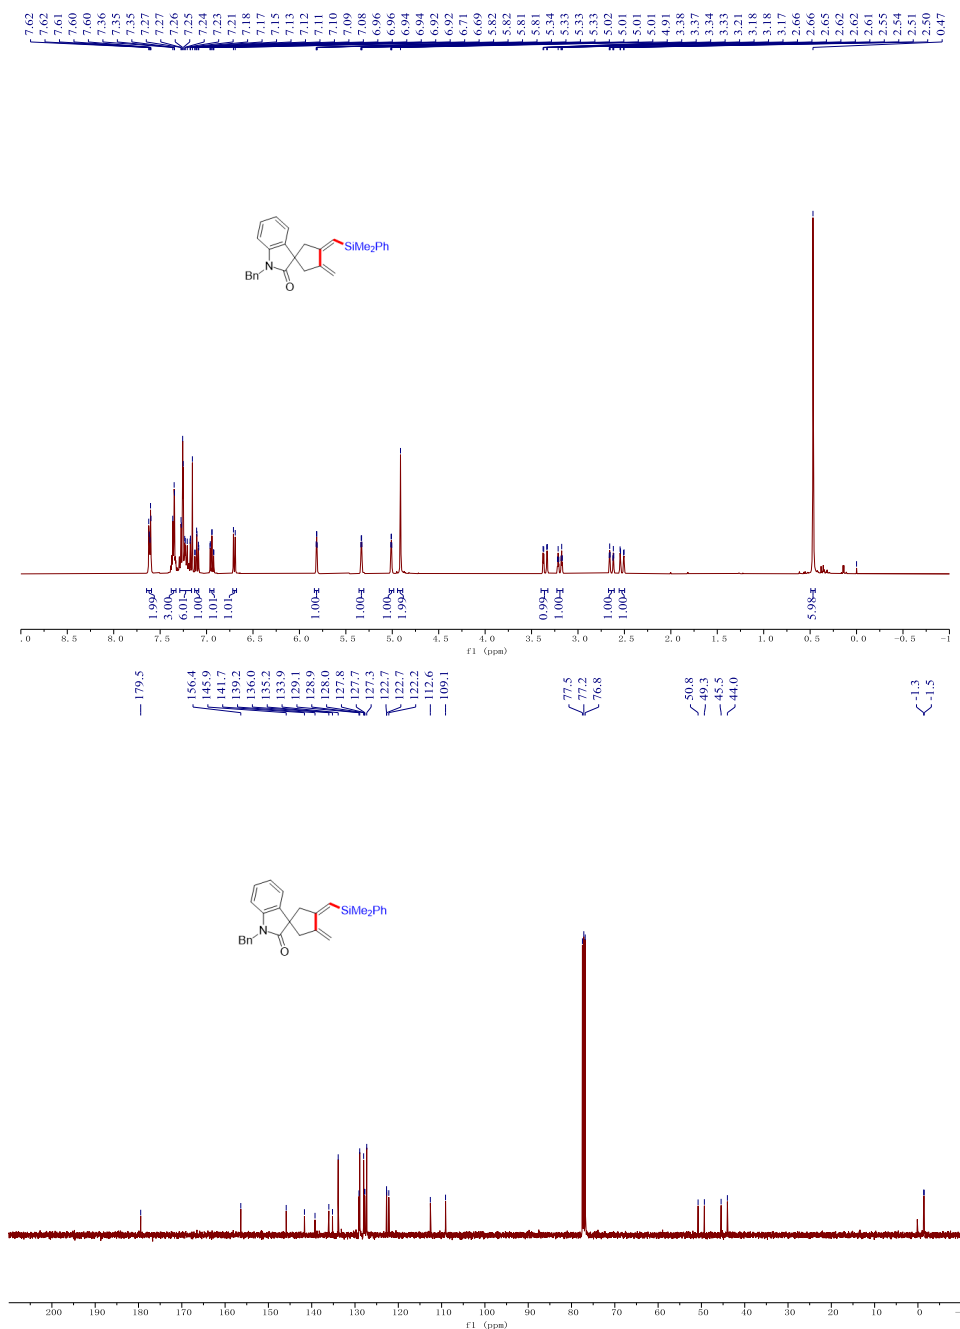

**(Z)-1'-benzyl-3-((dimethyl(phenyl)silyl)methylene)-5'-methyl-4-methylenespiro[cyclopentane-1,3'-indolin]-2'-one (3b)**

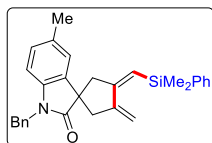

Prepared according to method E. The product **3b** was obtained as colorless oil in 71% yield (63.9 mg).

**<sup>1</sup>H NMR** (400 MHz, CDCl<sub>3</sub>) δ 7.65 – 7.59 (m, 2H), 7.41 – 7.36 (m, 3H), 7.32 – 7.23 (m, 5H), 7.01 (d, *J* = 1.7 Hz, 1H), 6.93 (ddd, *J* = 7.9, 1.8, 0.8 Hz, 1H), 6.60 (d, *J* = 7.9 Hz, 1H), 5.81 (dd, *J* = 2.7, 1.5 Hz, 1H), 5.32 (dd, *J* = 3.1, 1.5 Hz, 1H), 5.03 (dd, *J* = 2.7, 1.4 Hz, 1H), 4.91 (s, 2H), 3.34 (dd, *J* = 15.7, 2.7 Hz, 1H), 3.19 (dt, *J* = 15.3, 2.8 Hz, 1H), 2.62 (dt, *J* = 15.6, 1.9 Hz, 1H), 2.53 (dd, *J* = 15.2, 1.9 Hz, 1H), 2.28 (s, 3H), 0.47 (s, 3H), 0.46 (s, 3H).

**<sup>13</sup>C NMR** (101 MHz, CDCl<sub>3</sub>) δ 179.3, 156.5, 145.8, 139.2, 139.2, 136.1, 135.2, 133.8, 132.1, 129.1, 128.8, 128.0, 128.0, 127.6, 127.2, 123.6, 122.0, 112.7, 108.8, 50.8, 49.5, 45.4, 44.0, 21.3, -1.2, -1.7.

**HRMS** (ESI): *m/z* Calcd. for C<sub>30</sub>H<sub>32</sub>NOSi [M+H]<sup>+</sup>: 450.2253, found: 450.2252.

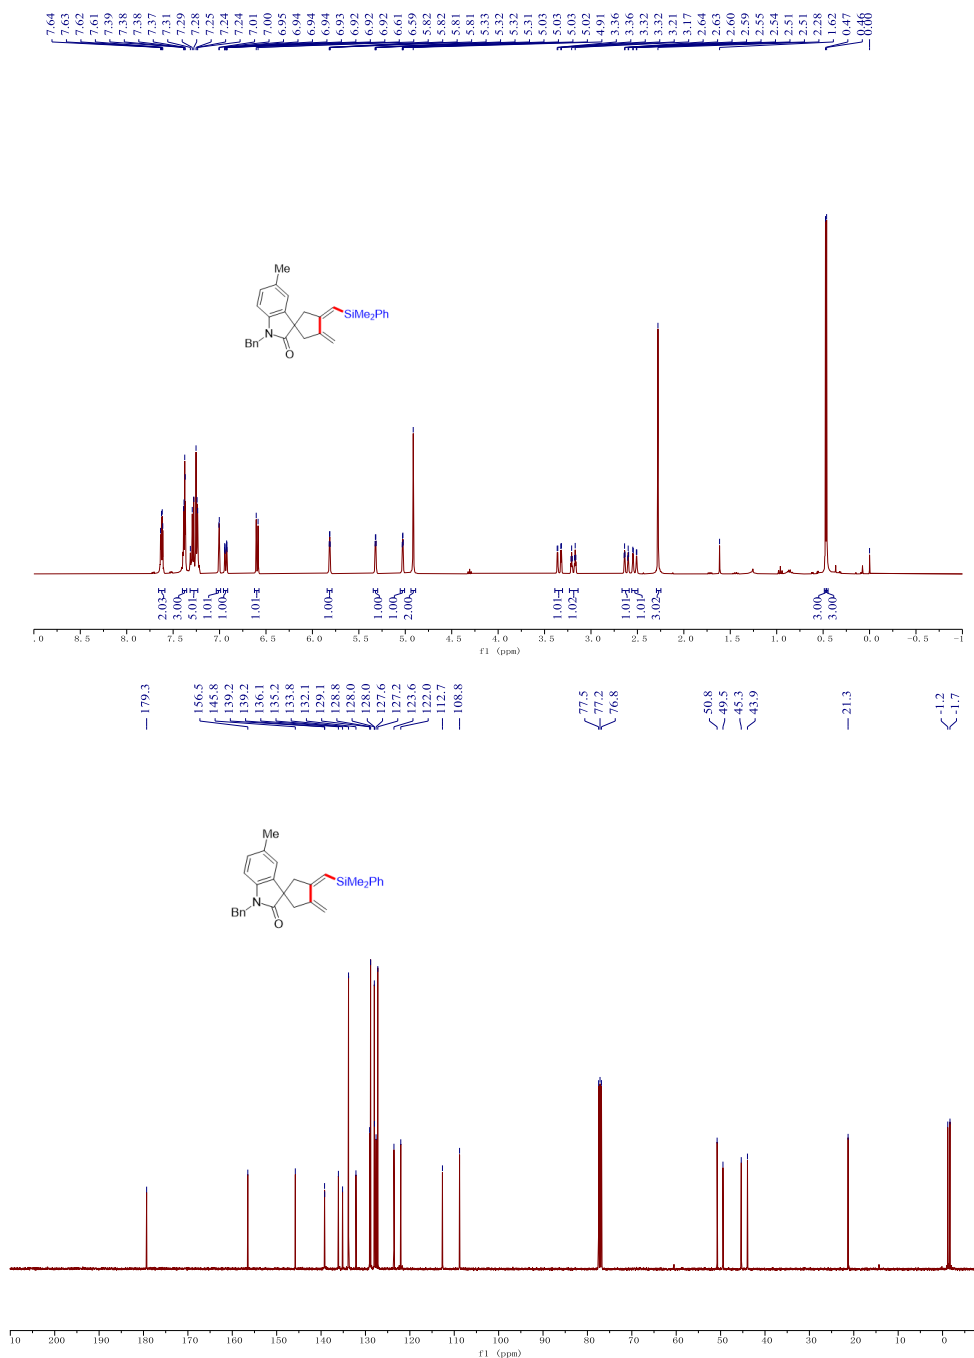



**(Z)-1'-benzyl-3-((dimethyl(phenyl)silyl)methylene)-5',7'-dimethyl-4-methylenespiro[cyclopentane-1,3'-indolin]-2'-one (3c)**

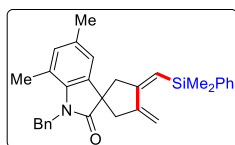

Prepared according to method E. The product **3c** was obtained as yellow oil in 71% yield (65.8 mg).

**<sup>1</sup>H NMR** (400 MHz, CDCl<sub>3</sub>) δ 7.65 – 7.60 (m, 2H), 7.41 – 7.35 (m, 3H), 7.31 – 7.25 (m, 2H), 7.25 – 7.16 (m, 1H), 7.11 – 7.05 (m, 2H), 6.91 (d, *J* = 1.8 Hz, 1H), 6.72 (dd, *J* = 1.9, 0.9 Hz, 1H), 5.82 (dd, *J* = 2.6, 1.5 Hz, 1H), 5.32 (dd, *J* = 3.1, 1.6 Hz, 1H), 5.19 (s, 2H), 5.03 (dd, *J* = 2.8, 1.4 Hz, 1H), 3.36 (dd, *J* = 15.7, 2.7 Hz, 1H), 3.21 (dt, *J* = 15.4, 2.8 Hz, 1H), 2.66 (dt, *J* = 15.6, 1.8 Hz, 1H), 2.56 (dd, *J* = 15.4, 1.8 Hz, 1H), 2.25 (s, 3H), 2.21 (s, 3H), 0.48 (s, 3H), 0.47 (s, 3H).

**<sup>13</sup>C NMR** (101 MHz, CDCl<sub>3</sub>) δ 180.4, 156.7, 145.9, 139.2, 137.9, 137.2, 136.1, 133.8, 132.2, 132.1, 129.0, 128.9, 128.0, 127.2, 125.6, 121.9, 121.4, 119.5, 112.6, 50.1, 49.9, 45.8, 45.1, 21.0, 18.8, -1.2, -1.7.

**HRMS** (ESI): *m/z* Calcd. for C<sub>31</sub>H<sub>34</sub>NOSi [M+H]<sup>+</sup>: 464.2410, found: 464.2414.

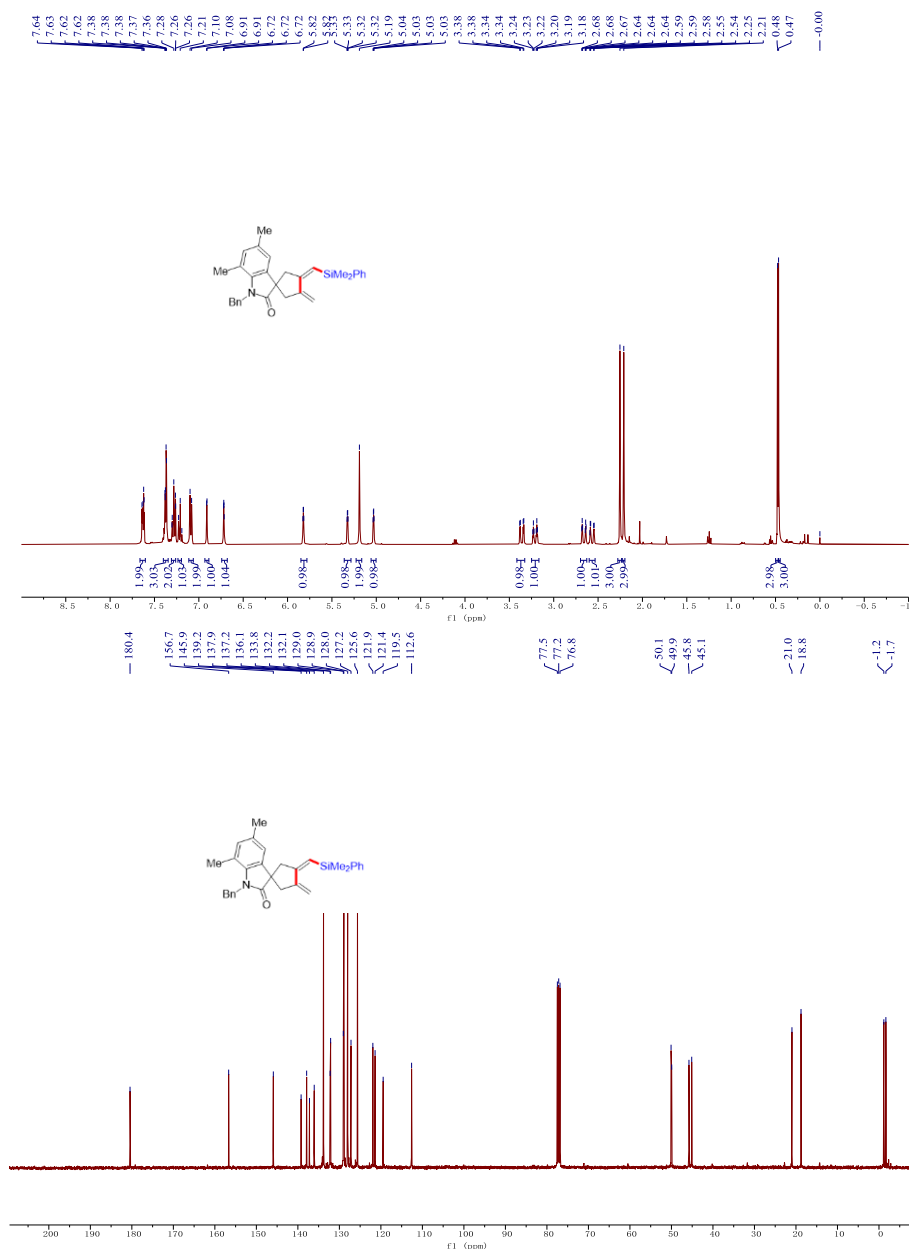

**(Z)-1'-benzyl-3-((dimethyl(phenyl)silyl)methylene)-5'-fluoro-4-methylenespiro[cyclopentane-1,3'-indolin]-2'-one (3d)**

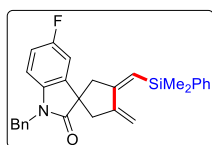

Prepared according to method E. The product **3d** was obtained as colorless oil in 59% yield (53.5 mg).

**<sup>1</sup>H NMR** (400 MHz, CDCl<sub>3</sub>) δ 7.65 – 7.57 (m, 2H), 7.42 – 7.20 (m, 8H), 6.92 (dd, *J* = 8.2, 2.6 Hz, 1H), 6.82 (td, *J* = 8.9, 2.6 Hz, 1H), 6.60 (dd, *J* = 8.5, 4.2 Hz, 1H), 5.84 (dd, *J* = 2.6, 1.4 Hz, 1H), 5.33 (dd, *J* = 3.1, 1.4 Hz, 1H), 5.03 (dd, *J* = 2.8, 1.4 Hz, 1H), 4.92 (s, 2H), 3.36 (dd, *J* = 15.7, 2.7 Hz, 1H), 3.20 (dt, *J* = 15.3, 2.9 Hz, 1H), 2.62 (dt, *J* = 15.6, 1.9 Hz, 1H), 2.51 (dd, *J* = 15.1, 1.9 Hz, 1H), 0.47 (s, 3H), 0.46 (s, 3H).

**<sup>13</sup>C NMR** (101 MHz, CDCl<sub>3</sub>) δ 179.1, 159.3 (d, *J* = 240.6 Hz), 155.7, 145.3, 139.0, 137.5 (d, *J* = 2.0 Hz), 136.6 (d, *J* = 8.3 Hz), 135.7, 133.8, 129.2, 129.0, 128.1, 127.8, 127.2, 122.9, 113.9 (d, *J* = 23.5 Hz), 113.0, 111.0 (d, *J* = 25.1 Hz), 109.5 (d, *J* = 8.1 Hz), 51.2 (d, *J* = 1.9 Hz), 49.2, 45.3, 44.1, -1.3, -1.6.

**<sup>19</sup>F NMR** (376 MHz, CDCl<sub>3</sub>) δ -120.48.

**HRMS** (ESI): *m/z* Calcd. for C<sub>29</sub>H<sub>29</sub>NOFSi [M+H]<sup>+</sup>: 454.2002, found: 454.2000.

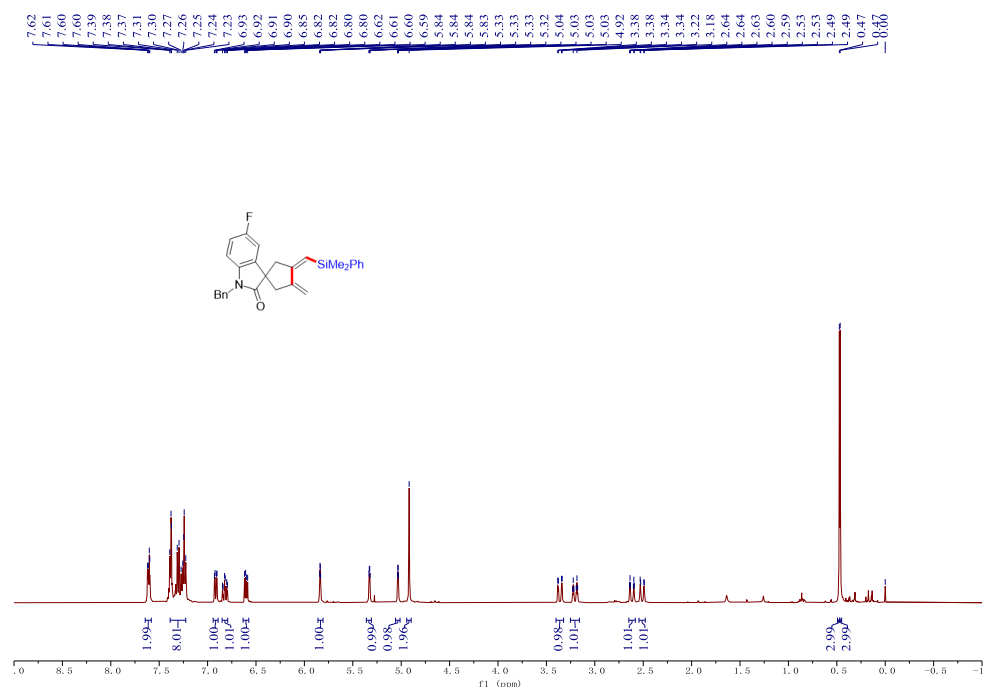

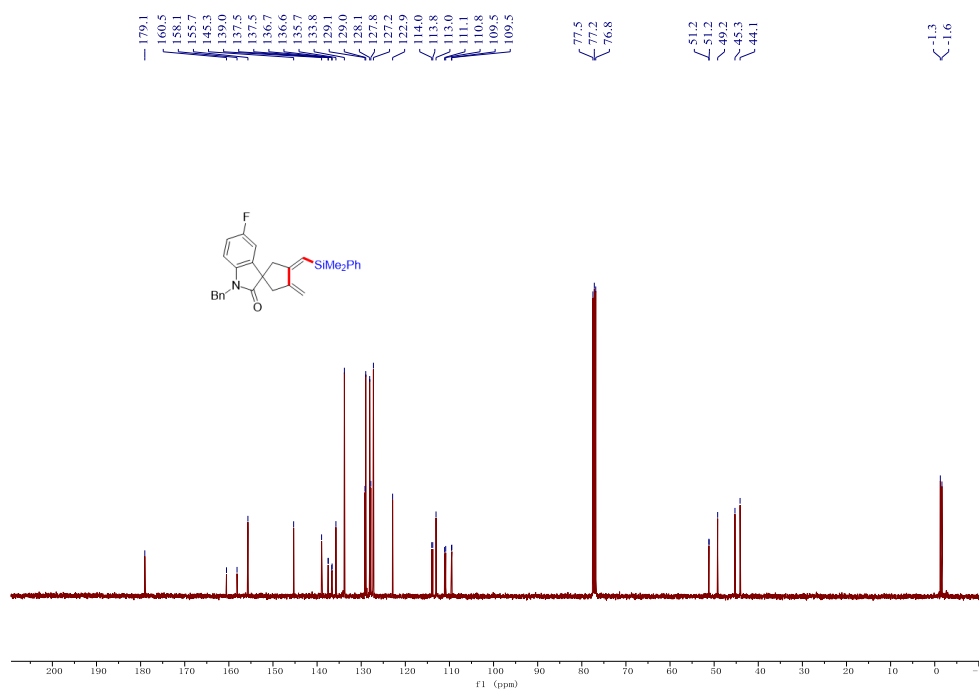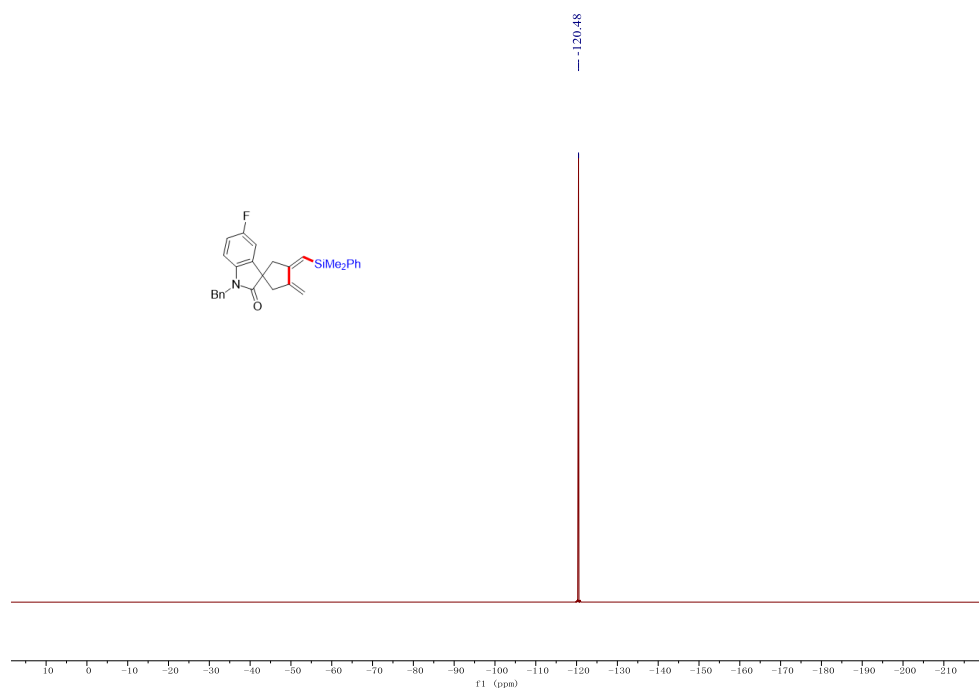

**(Z)-1'-benzyl-5'-chloro-3'-((dimethyl(phenyl)silyl)methylene)-4-methylenespiro[cyclopentane-1,3'-indolin]-2'-one (3e)**

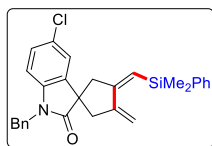

Prepared according to method E. The product **3e** was obtained as yellow oil in 80% yield (75.4 mg).

**<sup>1</sup>H NMR** (400 MHz, CDCl<sub>3</sub>) δ 7.61 (dd, *J* = 7.7, 1.8 Hz, 2H), 7.42 – 7.35 (m, 3H), 7.33 – 7.20 (m, 5H), 7.16 (d, *J* = 2.1 Hz, 1H), 7.09 (dd, *J* = 8.3, 2.1 Hz, 1H), 6.61 (d, *J* = 8.3 Hz, 1H), 5.84 (dd, *J* = 2.6, 1.4 Hz, 1H), 5.32 (dd, *J* = 3.1, 1.5 Hz, 1H), 5.03 (dd, *J* = 2.8, 1.4 Hz, 1H), 4.91 (s, 2H), 3.35 (dd, *J* = 15.7, 2.7 Hz, 1H), 3.19 (dt, *J* = 15.4, 2.9 Hz, 1H), 2.60 (dt, *J* = 15.7, 1.8 Hz, 1H), 2.51 (dd, *J* = 15.2, 2.0 Hz, 1H), 0.48 (s, 3H), 0.46 (s, 3H).

**<sup>13</sup>C NMR** (101 MHz, CDCl<sub>3</sub>) δ 178.8, 155.6, 145.1, 140.1, 138.9, 136.7, 135.6, 133.8, 129.1, 129.0, 128.1, 128.1, 127.8, 127.6, 127.2, 123.3, 123.0, 113.1, 110.0, 50.9, 49.3, 45.2, 44.0, -1.2, -1.8.

**HRMS** (ESI): *m/z* Calcd. for C<sub>29</sub>H<sub>29</sub>NOClSi [M+H]<sup>+</sup>: 470.1707, found: 470.1729.

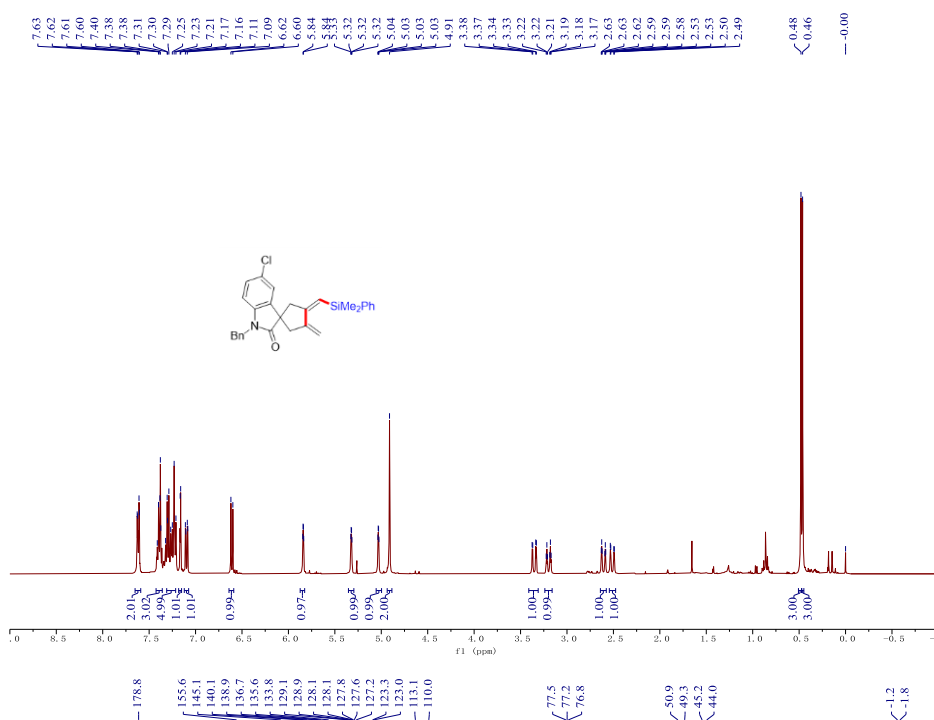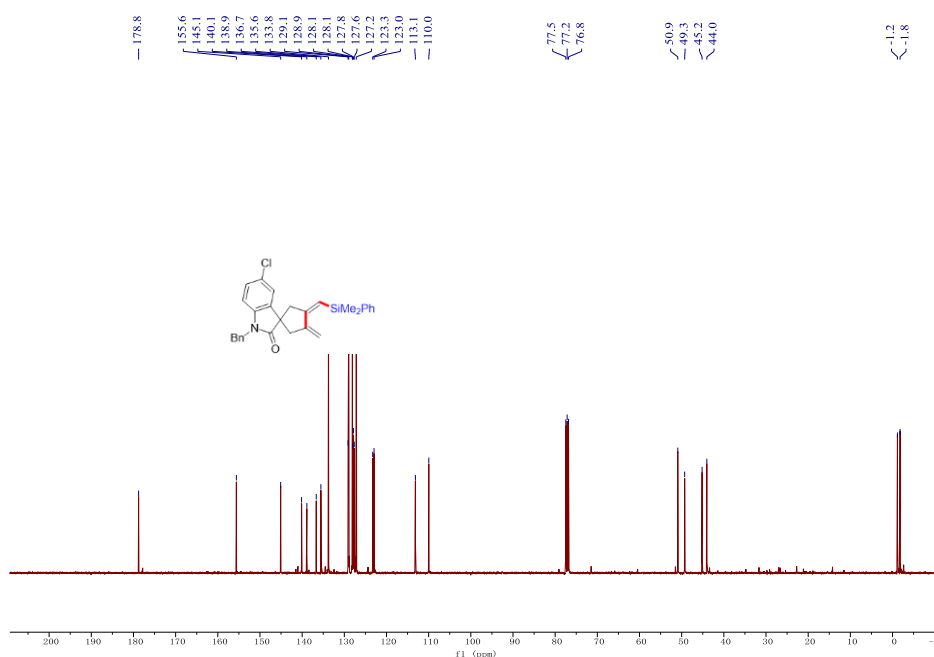

**(Z)-1'-benzyl-5'-bromo-3-((dimethyl(phenyl)silyl)methylene)-4-methylenespiro[cyclopentane-1,3'-indolin]-2'-one (3f)**

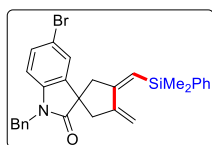

Prepared according to method E. The product **3f** was obtained as white solid in 64% yield (65.7 mg).

**<sup>1</sup>H NMR** (400 MHz, CDCl<sub>3</sub>) δ 7.65 – 7.58 (m, 2H), 7.45 – 7.34 (m, 3H), 7.33 – 7.18 (m, 7H), 6.57 (d, *J* = 8.3 Hz, 1H), 5.84 (t, *J* = 1.9 Hz, 1H), 5.32 (dd, *J* = 3.0, 1.4 Hz, 1H), 5.03 (d, *J* = 1.4 Hz, 1H), 4.90 (s, 2H), 3.35 (dd, *J* = 15.5, 2.6 Hz, 1H), 3.20 (dt, *J* = 15.4, 2.9 Hz, 1H), 2.60 (dt, *J* = 15.5, 1.8 Hz, 1H), 2.52 (d, *J* = 15.4 Hz, 1H), 0.48 (s, 3H), 0.46 (s, 3H).

**<sup>13</sup>C NMR** (101 MHz, CDCl<sub>3</sub>) δ 178.7, 155.6, 145.0, 140.6, 138.9, 137.0, 135.5, 133.8, 130.6, 129.1, 129.0, 128.1, 127.8, 127.2, 126.0, 123.0, 115.5, 113.2, 110.5, 50.9, 49.3, 45.1, 44.0, -1.2, -1.8.

**HRMS** (ESI): *m/z* Calcd. for C<sub>29</sub>H<sub>29</sub>NOBrSi [M+H]<sup>+</sup>: 514.1202, found: 514.1199.

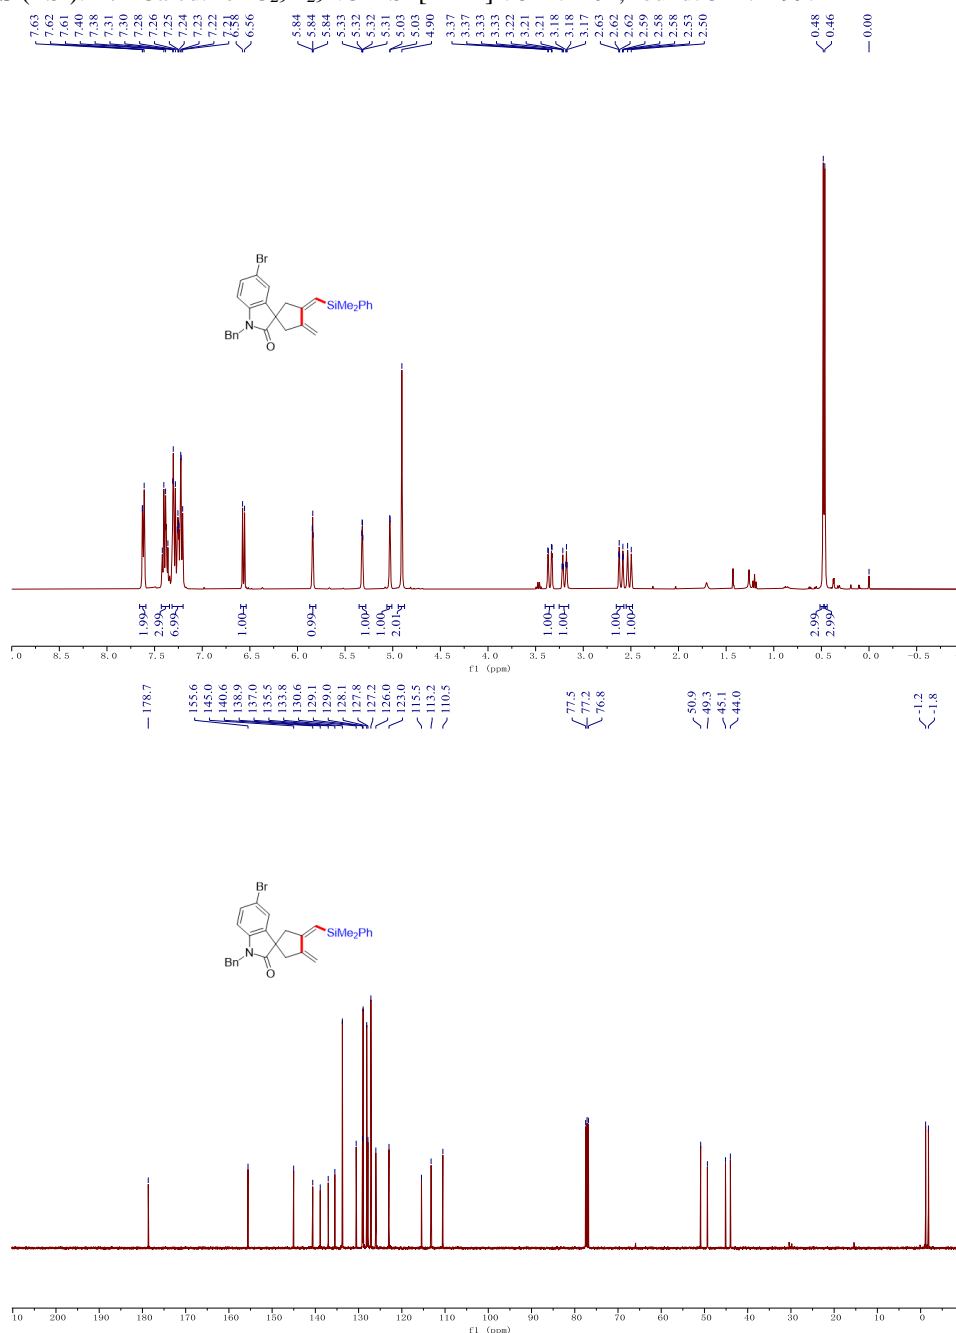

**(Z)-1'-benzyl-7'-bromo-3-((dimethyl(phenyl)silyl)methylene)-4-methylenespiro[cyclopentane-1,3'-indolin]-2'-one (3g)**

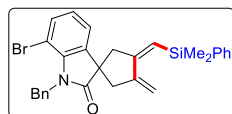

Prepared according to method E. The product **3g** was obtained as colorless oil in 61% yield (62.7 mg).

**<sup>1</sup>H NMR** (400 MHz, CDCl<sub>3</sub>) δ 7.64 – 7.57 (m, 2H), 7.42 – 7.34 (m, 3H), 7.34 – 7.20 (m, 4H), 7.14 (dd, *J* = 11.2, 7.7 Hz, 3H), 6.84 (ddd, *J* = 8.1, 7.2, 0.7 Hz, 1H), 5.82 (dd, *J* = 2.6, 1.4 Hz, 1H), 5.43 (s, 2H), 5.33 (dt, *J* = 2.8, 1.3 Hz, 1H), 5.03 (dd, *J* = 2.7, 1.4 Hz, 1H), 3.35 (dd, *J* = 15.9, 2.6 Hz, 1H), 3.20 (dt, *J* = 15.4, 2.9 Hz, 1H), 2.65 (dt, *J* = 16.0, 1.7 Hz, 1H), 2.55 (dd, *J* = 15.5, 1.9 Hz, 1H), 0.47 (s, 6H).

**<sup>13</sup>C NMR** (101 MHz, CDCl<sub>3</sub>) δ 180.3, 155.9, 145.5, 139.2, 139.1, 138.5, 137.7, 133.8, 133.7, 129.1, 128.7, 128.0, 127.2, 126.3, 124.1, 122.7, 121.7, 112.9, 102.5, 50.3, 49.6, 45.8, 44.7, -1.3, -1.5.

**HRMS** (ESI): *m/z* Calcd. for C<sub>29</sub>H<sub>29</sub>NOBrSi [M+H]<sup>+</sup>: 514.1202, found: 514.1201.

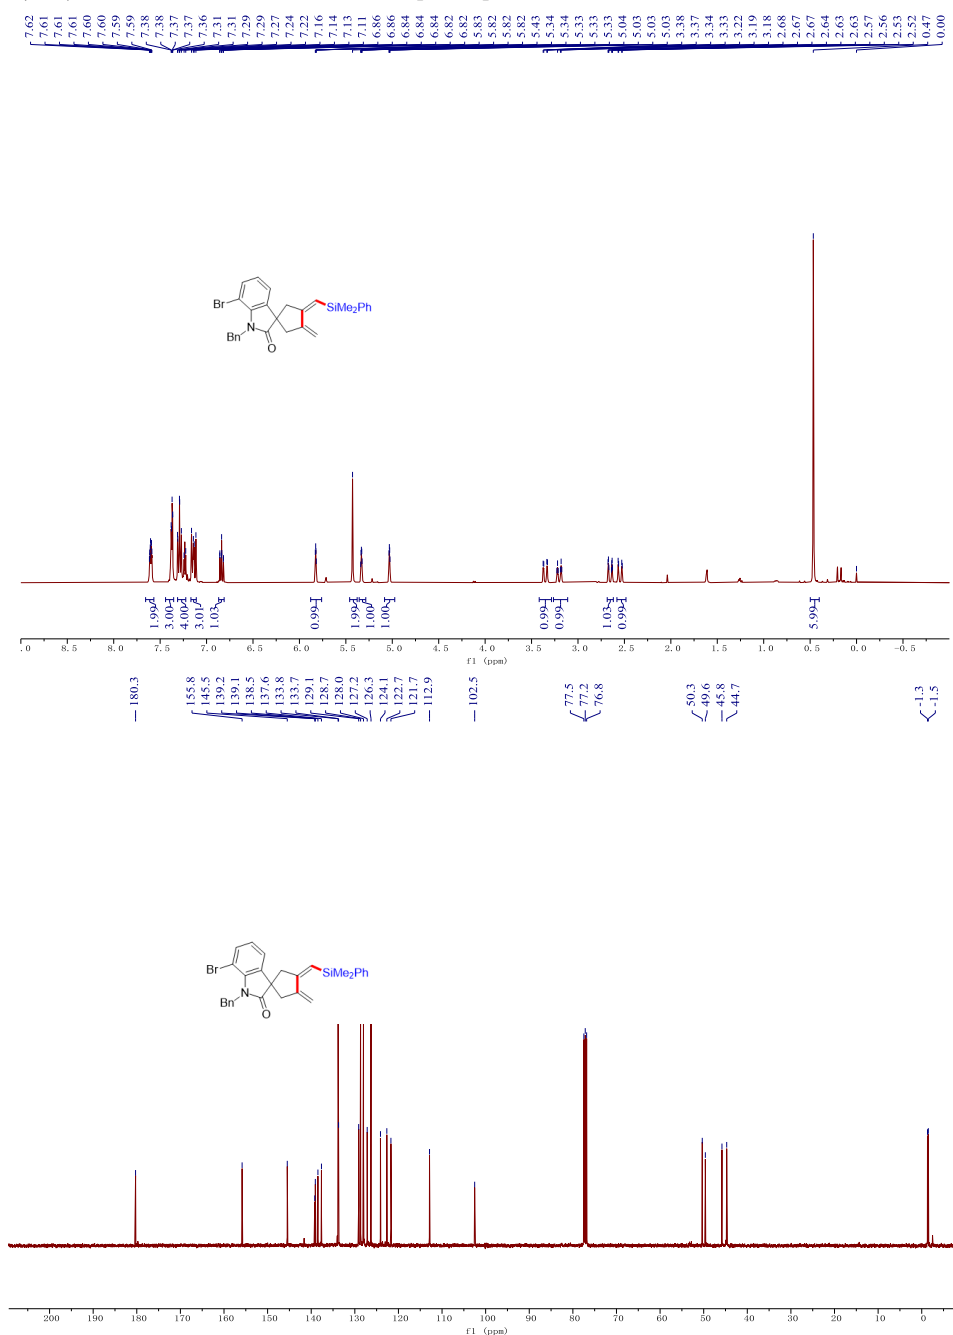

**(Z)-1'-benzyl-3-((dimethyl(phenyl)silyl)methylene)-5'-methoxy-4-methylenespiro[cyclopentane-1,3'-indolin]-2'-one (3h)**

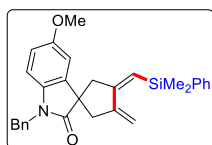

Prepared according to method E. The product **3h** was obtained as yellow oil in 70% yield (65.1 mg).

**<sup>1</sup>H NMR** (400 MHz, CDCl<sub>3</sub>) δ 7.65 – 7.57 (m, 2H), 7.40 – 7.33 (m, 3H), 7.33 – 7.21 (m, 5H), 6.83 (d, *J* = 2.5 Hz, 1H), 6.65 (dd, *J* = 8.5, 2.6 Hz, 1H), 6.59 (d, *J* = 8.5 Hz, 1H), 5.82 (t, *J* = 2.0 Hz, 1H), 5.32 (dd, *J* = 3.1, 1.4 Hz, 1H), 5.03 (dd, *J* = 2.7, 1.4 Hz, 1H), 4.91 (s, 2H), 3.71 (s, 3H), 3.35 (dd, *J* = 15.8, 2.7 Hz, 1H), 3.20 (dt, *J* = 15.3, 2.9 Hz, 1H), 2.63 (dt, *J* = 15.8, 1.8 Hz, 1H), 2.53 (dd, *J* = 15.2, 1.9 Hz, 1H), 0.46 (s, 6H).

**<sup>13</sup>C NMR** (101 MHz, CDCl<sub>3</sub>) δ 179.1, 156.3, 156.1, 145.8, 139.2, 136.5, 136.1, 135.1, 133.8, 129.1, 128.9, 128.0, 127.7, 127.3, 122.3, 112.8, 112.1, 110.1, 109.4, 55.8, 51.2, 49.3, 45.5, 44.1, -1.3, -1.5.

**HRMS** (ESI): *m/z* Calcd. for C<sub>30</sub>H<sub>32</sub>NO<sub>2</sub>Si [M+H]<sup>+</sup>: 466.2202, found: 466.2198.

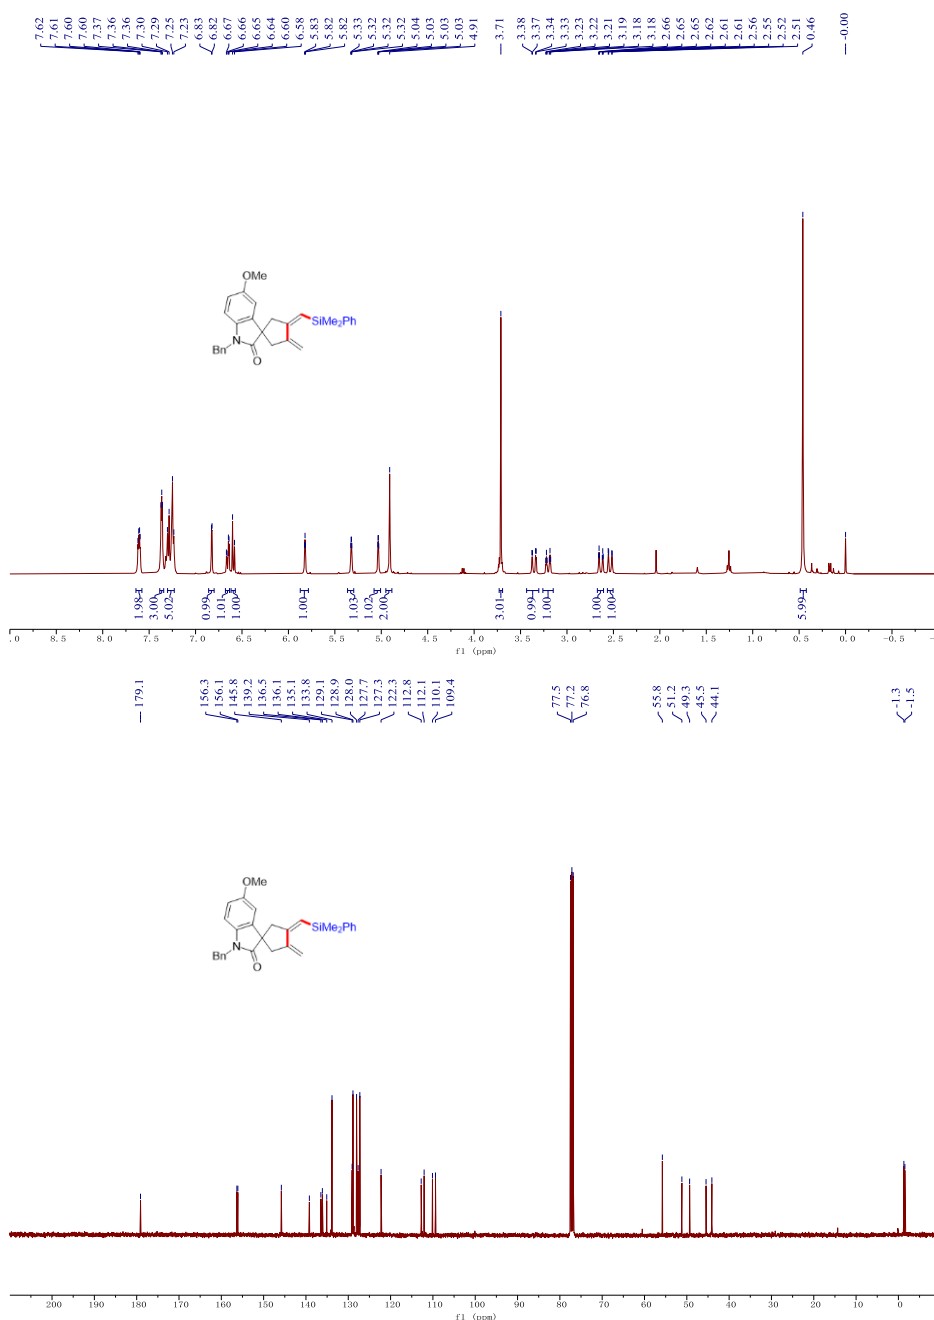

**(Z)-3-((dimethyl(phenyl)silyl)methylene)-1'-methyl-4-methylenespiro[cyclopentane-1,3'-indolin]-2'-one (3i)**

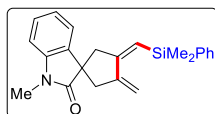

Prepared according to method E. The product **3i** was obtained as yellow oil in 53% yield (38.2 mg).

$^1\text{H NMR}$  (400 MHz,  $\text{CDCl}_3$ )  $\delta$  7.64 – 7.58 (m, 2H), 7.40 – 7.35 (m, 3H), 7.27 (td,  $J = 7.7, 1.1$  Hz, 1H), 7.16 (d,  $J = 7.3$  Hz, 1H), 7.00 (t,  $J = 7.5$  Hz, 1H), 6.84 (d,  $J = 7.7$  Hz, 1H), 5.79 (s, 1H), 5.31 (d,  $J = 1.5$  Hz, 1H), 5.01 (s, 1H), 3.27 (dd,  $J = 15.9, 2.6$  Hz, 1H), 3.23 (s, 3H), 3.12 (dt,  $J = 15.3, 2.8$  Hz, 1H), 2.57 (d,  $J = 15.8$  Hz, 1H), 2.47 (d,  $J = 15.2$  Hz, 1H), 0.46 (s, 6H).

$^{13}\text{C NMR}$  (101 MHz,  $\text{CDCl}_3$ )  $\delta$  179.4, 156.5, 146.0, 142.6, 139.3, 135.3, 133.9, 129.1, 128.0, 127.9, 122.7, 122.6, 122.1, 112.6, 108.0, 50.8, 49.2, 45.3, 26.6, -1.3, -1.5.

**HRMS** (ESI):  $m/z$  Calcd. for  $\text{C}_{23}\text{H}_{26}\text{NOSi}$   $[\text{M}+\text{H}]^+$ : 360.1784, found: 360.1781.

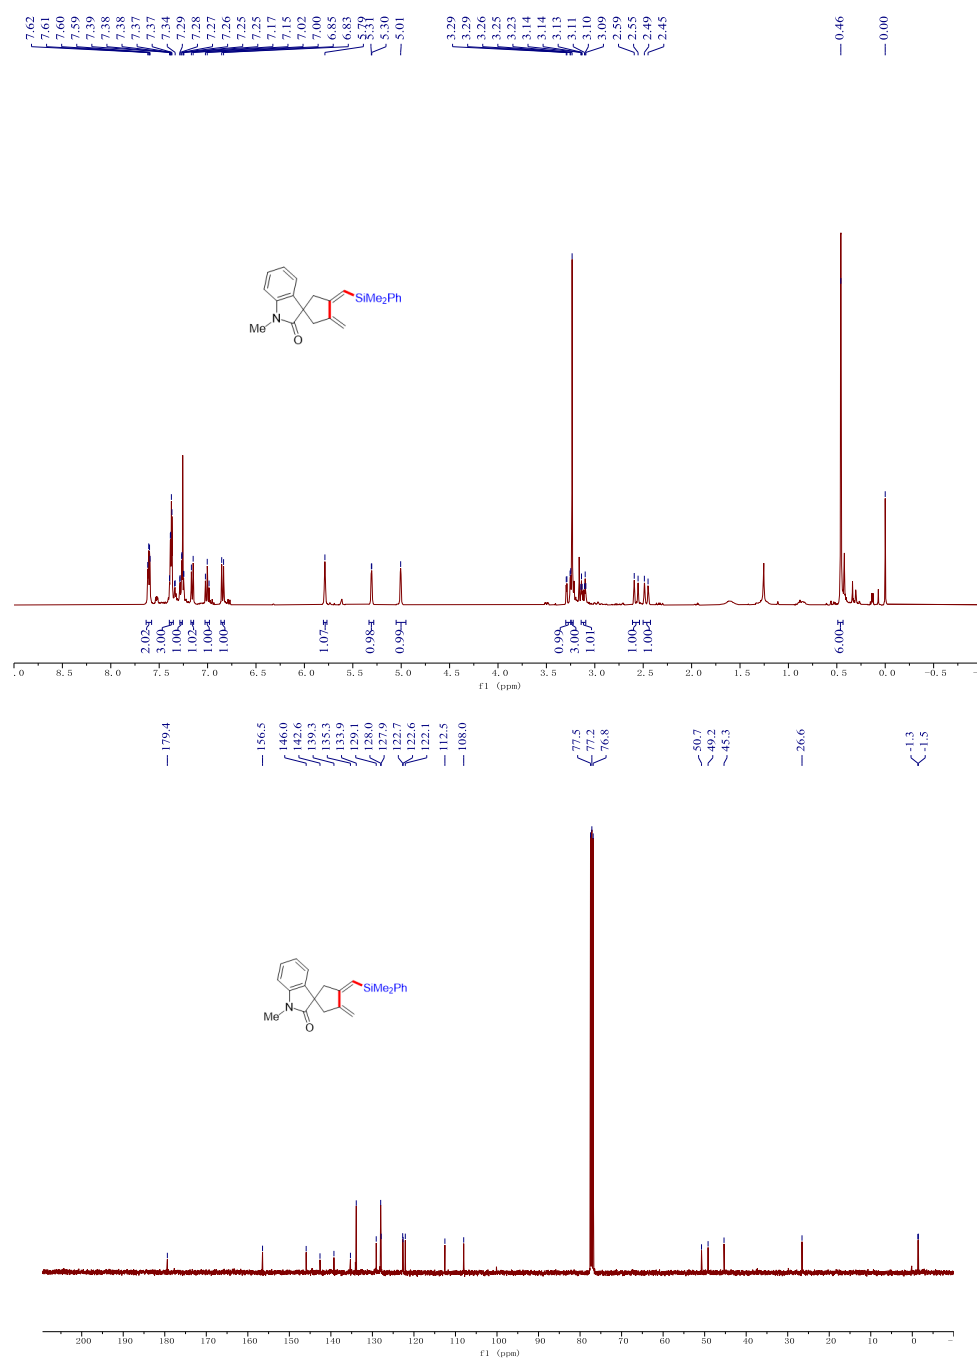



**(Z)-3-((dimethyl(phenyl)silyl)methylene)-4-methylene-1'-propylspiro[cyclopentane-1,3'-indolin]-2'-one (3j)**

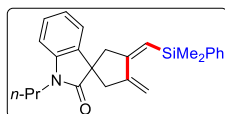

Prepared according to method E. The product **3j** was obtained as yellow oil in 76% yield (58.3 mg).

**<sup>1</sup>H NMR** (400 MHz, CDCl<sub>3</sub>) δ 7.64 – 7.58 (m, 2H), 7.40 – 7.34 (m, 3H), 7.27 – 7.21 (m, 1H), 7.16 (dd, *J* = 7.4, 1.2 Hz, 1H), 6.98 (td, *J* = 7.5, 1.0 Hz, 1H), 6.85 (dt, *J* = 7.8, 0.7 Hz, 1H), 5.79 (dd, *J* = 2.7, 1.5 Hz, 1H), 5.31 (dd, *J* = 3.1, 1.4 Hz, 1H), 5.00 (dd, *J* = 2.8, 1.4 Hz, 1H), 3.69 (t, *J* = 7.3 Hz, 2H), 3.28 (dd, *J* = 15.8, 2.7 Hz, 1H), 3.12 (dt, *J* = 15.3, 2.8 Hz, 1H), 2.57 (dt, *J* = 15.8, 1.8 Hz, 1H), 2.46 (dt, *J* = 15.2, 1.7 Hz, 1H), 1.71 (h, *J* = 7.4 Hz, 2H), 0.95 (t, *J* = 7.4 Hz, 3H), 0.46 (s, 6H).

**<sup>13</sup>C NMR** (101 MHz, CDCl<sub>3</sub>) δ 179.2, 156.5, 146.0, 142.0, 139.2, 135.4, 133.8, 129.0, 128.0, 127.7, 122.7, 122.4, 121.9, 112.5, 108.3, 50.6, 49.2, 45.3, 41.7, 20.9, 11.4, -1.4, -1.5.

**HRMS** (ESI): *m/z* Calcd. for C<sub>25</sub>H<sub>30</sub>NOSi [M+H]<sup>+</sup>: 388.2097, found: 388.2093.

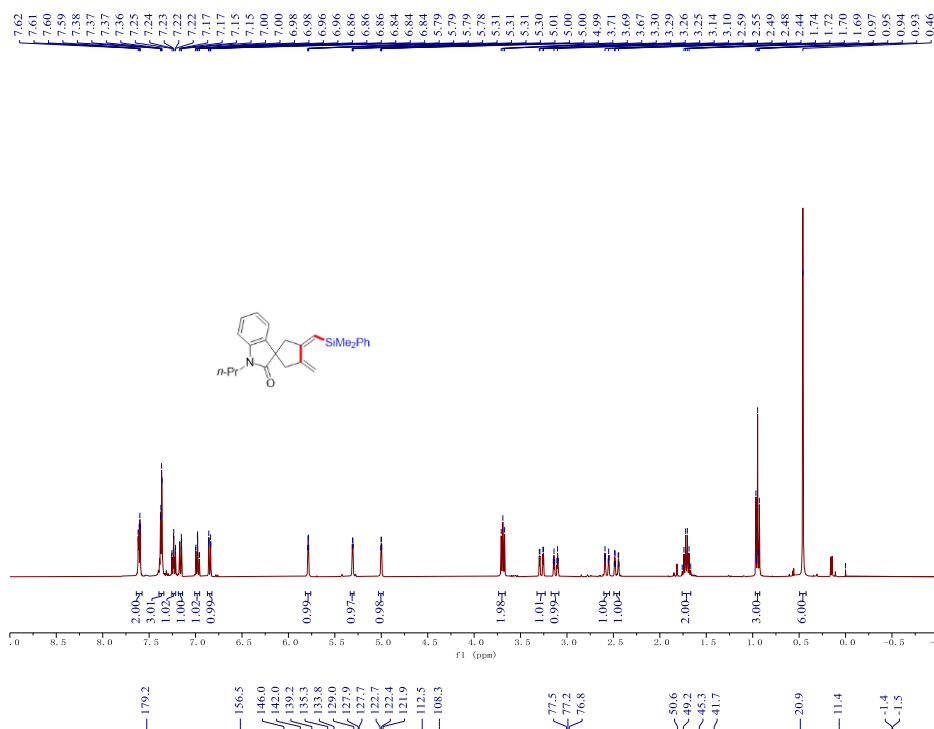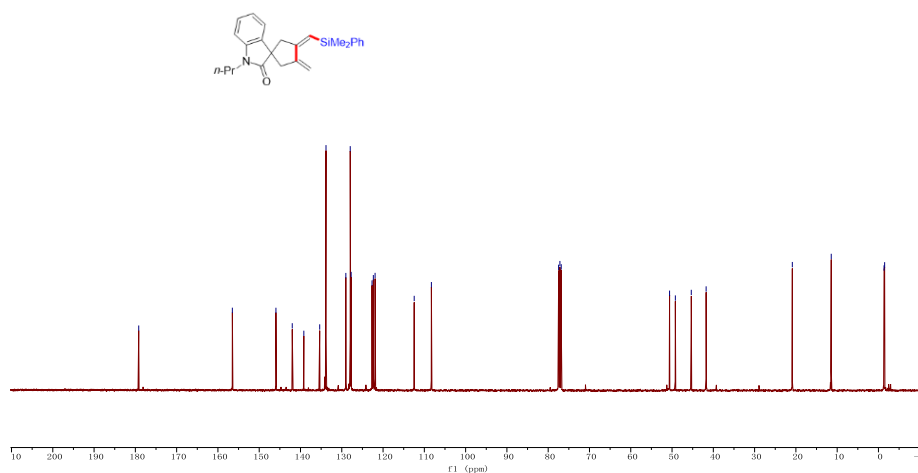

**(Z)-3-((dimethyl(phenyl)silyl)methylene)-4-methylene-1'-phenylspiro[cyclopentane-1,3'-indolin]-2'-one (3k)**

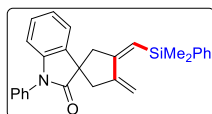

Prepared according to method E. The product **3k** was obtained as white solid in 69% yield (58.0 mg).

<sup>1</sup>H NMR (400 MHz, CDCl<sub>3</sub>) δ 7.66 – 7.58 (m, 2H), 7.55 – 7.48 (m, 2H), 7.45 – 7.36 (m, 6H), 7.26 – 7.16 (m, 2H), 7.04 (td, *J* = 7.5, 1.1 Hz, 1H), 6.85 (d, *J* = 7.8 Hz, 1H), 5.83 (dd, *J* = 2.6, 1.5 Hz, 1H), 5.34 (dd, *J* = 3.1, 1.4 Hz, 1H), 5.05 (dd, *J* = 2.7, 1.4 Hz, 1H), 3.38 (dd, *J* = 15.8, 2.7 Hz, 1H), 3.23 (dt, *J* = 15.3, 2.8 Hz, 1H), 2.72 (dt, *J* = 15.8, 1.9 Hz, 1H), 2.62 (dd, *J* = 15.2, 1.7 Hz, 1H), 0.48 (s, 3H), 0.47 (s, 3H).

<sup>13</sup>C NMR (101 MHz, CDCl<sub>3</sub>) δ 178.8, 156.3, 145.8, 142.4, 139.2, 135.0, 134.7, 133.9, 129.7, 129.1, 128.1, 128.0, 127.8, 126.6, 123.2, 122.9, 122.2, 112.7, 109.3, 50.9, 49.6, 45.8, -1.3, -1.5.

HRMS (ESI): *m/z* Calcd. for C<sub>28</sub>H<sub>28</sub>NOSi [M+H]<sup>+</sup>: 422.1940, found: 422.1939.

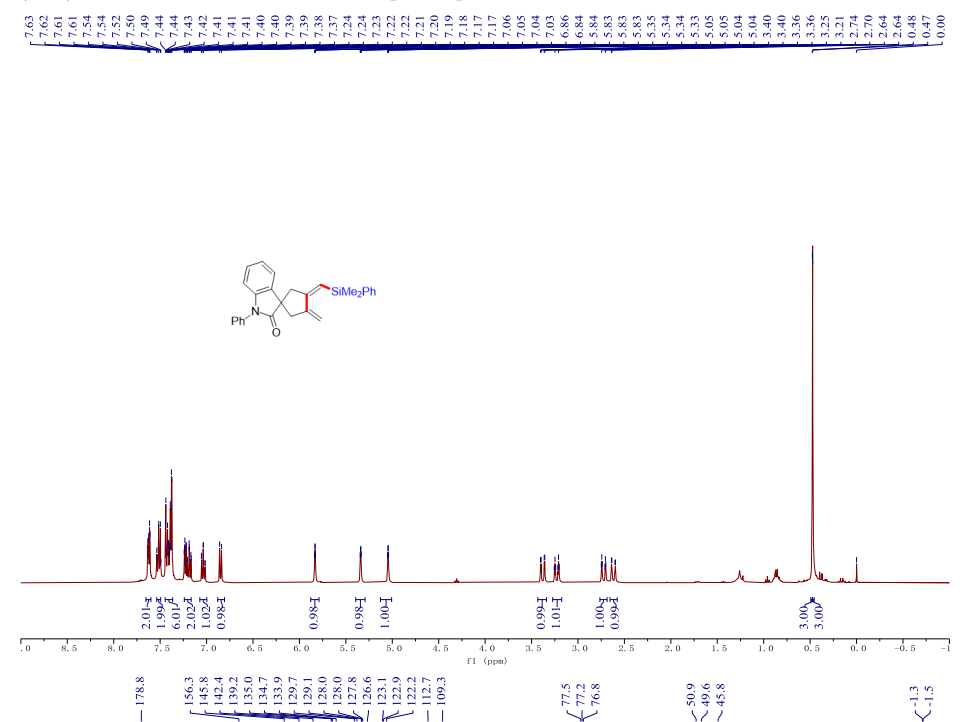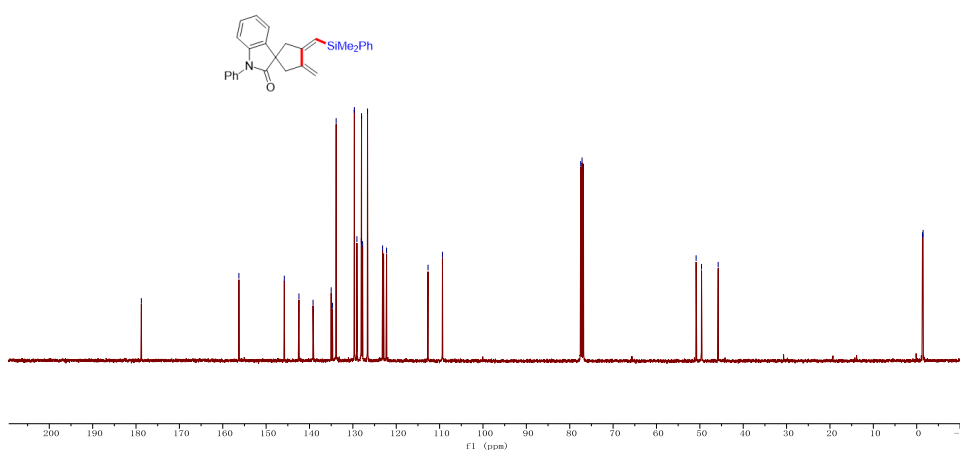

**(Z)-1'-acetyl-3-((dimethyl(phenyl)silyl)methylene)-4-methylenespiro[cyclopentane-1,3'-indolin]-2'-one (3I)**

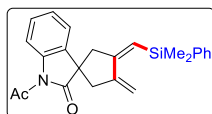

Prepared according to method E. The product **3I** was obtained as white solid in 49% yield (37.8 mg).

<sup>1</sup>H NMR (400 MHz, CDCl<sub>3</sub>) δ 8.24 (dt, *J* = 8.1, 0.8 Hz, 1H), 7.63 – 7.58 (m, 2H), 7.42 – 7.37 (m, 3H), 7.31 (ddd, *J* = 8.3, 7.2, 1.9 Hz, 1H), 7.21 – 7.13 (m, 2H), 5.82 (t, *J* = 2.1 Hz, 1H), 5.34 (dd, *J* = 3.0, 1.6 Hz, 1H), 5.03 (t, *J* = 2.1 Hz, 1H), 3.29 (dd, *J* = 15.9, 2.6 Hz, 1H), 3.14 (dt, *J* = 15.4, 2.8 Hz, 1H), 2.70 (s, 3H), 2.69 (dt, *J* = 15.7, 1.9 Hz, 1H), 2.60 (dd, *J* = 15.4, 1.8 Hz, 1H), 0.47 (s, 6H).

<sup>13</sup>C NMR (101 MHz, CDCl<sub>3</sub>) δ 180.6, 171.1, 155.4, 145.2, 139.0, 138.7, 134.1, 133.9, 129.2, 128.3, 128.1, 125.5, 122.9, 122.3, 116.5, 113.0, 51.2, 50.4, 46.6, 26.9, -1.4, -1.5.

HRMS (ESI): *m/z* Calcd. for C<sub>24</sub>H<sub>26</sub>NO<sub>2</sub>Si [M+H]<sup>+</sup>: 388.1733, found: 388.1724.

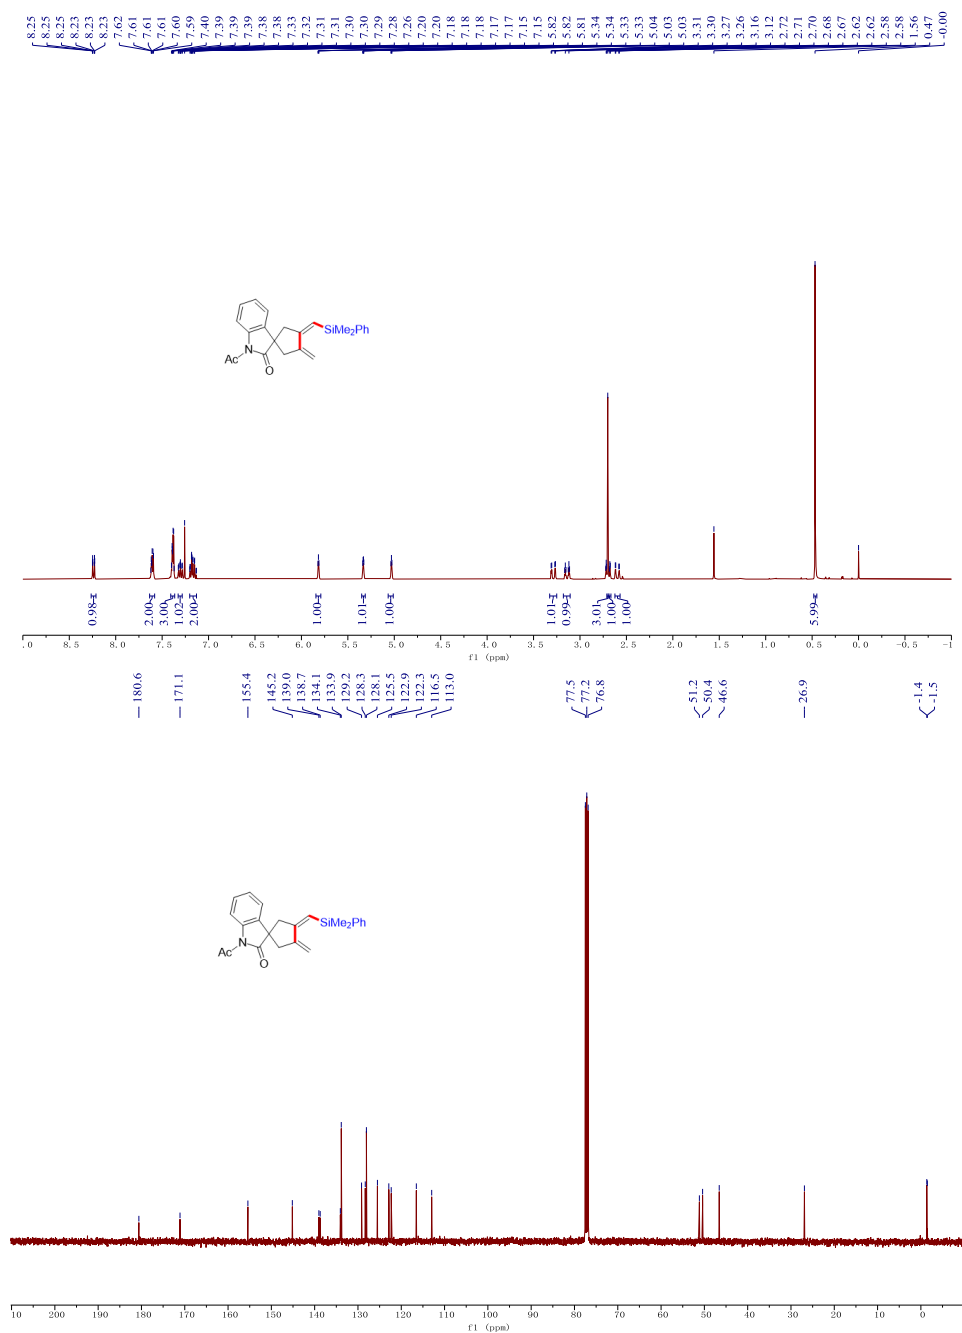

**(Z)-1'-allyl-3-((dimethyl(phenyl)silyl)methylene)-4-methylenespiro[cyclopentane-1,3'-indolin]-2'-one (3m)**

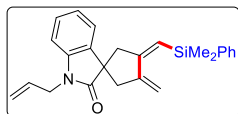

Prepared according to method **E**. The product **3m** was obtained as colorless crystal in 65% yield (50.1 mg).

**<sup>1</sup>H NMR** (400 MHz, CDCl<sub>3</sub>) δ 7.63 – 7.57 (m, 2H), 7.40 – 7.34 (m, 3H), 7.24 – 7.13 (m, 2H), 6.98 (tt, *J* = 7.5, 1.0 Hz, 1H), 6.83 (dt, *J* = 7.7, 0.8 Hz, 1H), 5.89 – 5.80 (m, 1H), 5.80 – 5.78 (m, 1H), 5.31 (dt, *J* = 2.9, 1.4 Hz, 1H), 5.24 – 5.14 (m, 2H), 5.00 (dt, *J* = 2.5, 1.2 Hz, 1H), 4.36 (ddd, *J* = 5.3, 2.2, 1.2 Hz, 2H), 3.29 (d, *J* = 15.9 Hz, 1H), 3.13 (d, *J* = 15.3 Hz, 1H), 2.60 (d, *J* = 17.0 Hz, 1H), 2.49 (d, *J* = 15.4 Hz, 1H), 0.46 (s, 6H).

**<sup>13</sup>C NMR** (101 MHz, CDCl<sub>3</sub>) δ 179.0, 156.4, 145.9, 141.7, 139.2, 135.1, 133.8, 131.6, 129.1, 128.0, 127.8, 122.6, 122.6, 122.1, 117.5, 112.6, 108.9, 50.6, 49.2, 45.4, 42.6, -1.4, -1.5.

**HRMS** (ESI): *m/z* Calcd. for C<sub>25</sub>H<sub>28</sub>NOSi [M+H]<sup>+</sup>: 386.1940, found: 386.1942.

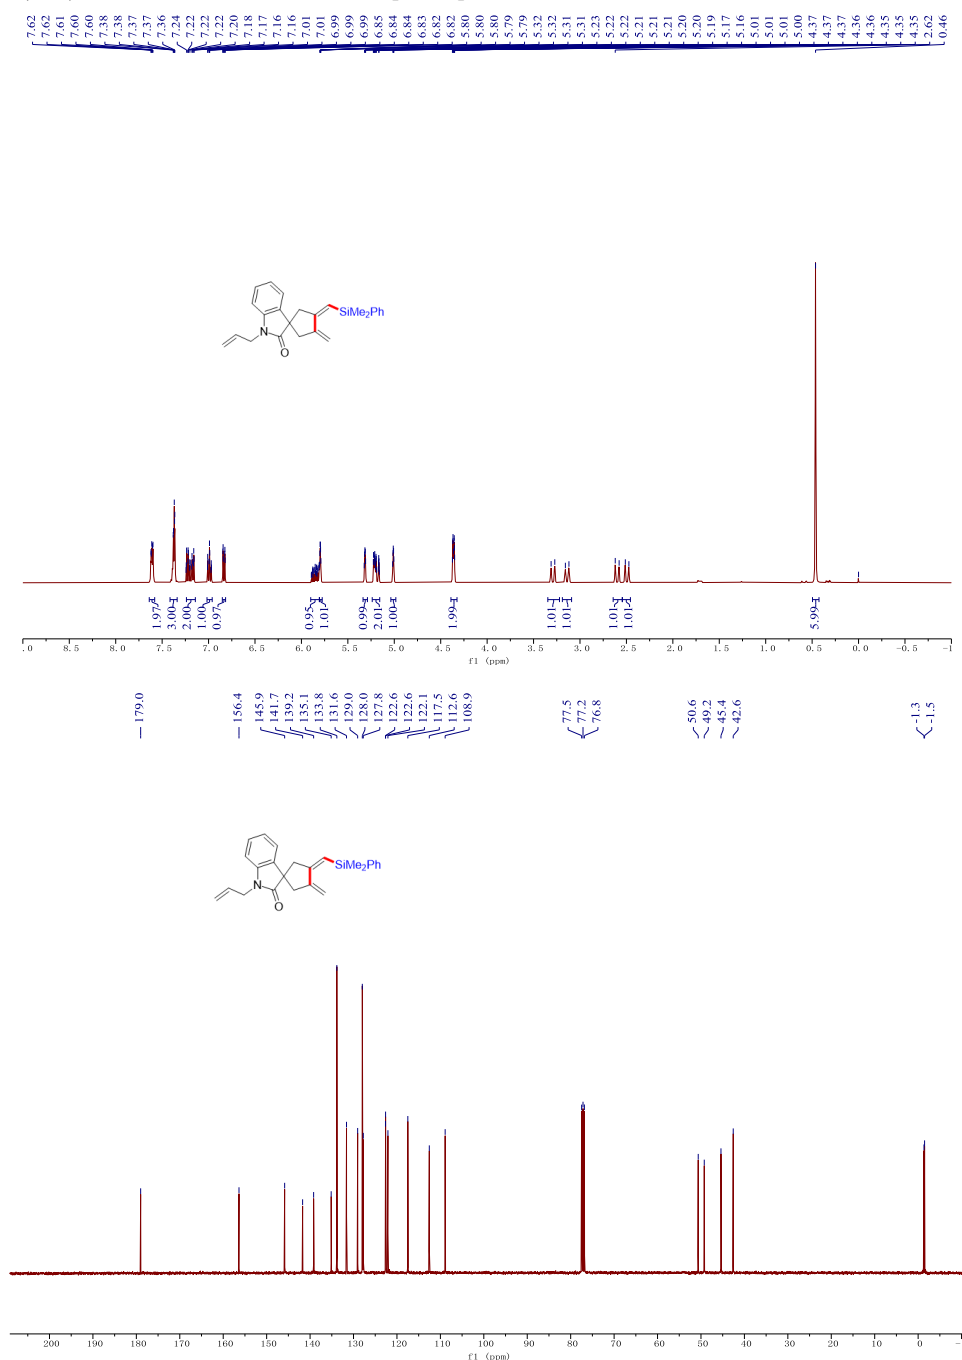

**(Z)-1'-(but-2-yn-1-yl)-3-((dimethyl(phenyl)silyl)methylene)-4-methylenespiro[cyclopentane-1,3'-indolin]-2'-one (3n)**

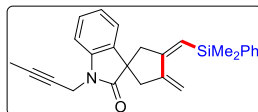

Prepared according to method E. The product **3n** was obtained as yellow oil in 78% yield (62.1 mg).

**<sup>1</sup>H NMR** (400 MHz, CDCl<sub>3</sub>) δ 7.63 – 7.57 (m, 2H), 7.39 – 7.34 (m, 3H), 7.28 (td, *J* = 7.7, 1.3 Hz, 1H), 7.18 – 7.15 (m, 1H), 7.06 (dt, *J* = 7.7, 0.8 Hz, 1H), 7.02 (td, *J* = 7.5, 1.0 Hz, 1H), 5.78 (dd, *J* = 2.6, 1.5 Hz, 1H), 5.30 (dd, *J* = 3.0, 1.5 Hz, 1H), 5.00 (dd, *J* = 2.8, 1.4 Hz, 1H), 4.46 (q, *J* = 2.4 Hz, 2H), 3.27 (dd, *J* = 15.8, 2.7 Hz, 1H), 3.11 (dt, *J* = 15.3, 2.8 Hz, 1H), 2.60 (dt, *J* = 15.8, 1.9 Hz, 1H), 2.49 (dq, *J* = 15.3, 1.7 Hz, 1H), 1.77 (t, *J* = 2.4 Hz, 3H), 0.46 (s, 6H).

**<sup>13</sup>C NMR** (101 MHz, CDCl<sub>3</sub>) δ 178.4, 156.3, 145.8, 141.1, 139.2, 135.1, 133.9, 129.1, 128.0, 127.8, 122.8, 122.6, 122.1, 112.6, 109.2, 80.1, 72.4, 50.7, 49.2, 45.3, 30.0, 3.7, -1.4, -1.5.

**HRMS** (ESI): *m/z* Calcd. for C<sub>26</sub>H<sub>28</sub>NOSi [M+H]<sup>+</sup>: 398.1940, found: 398.1940.

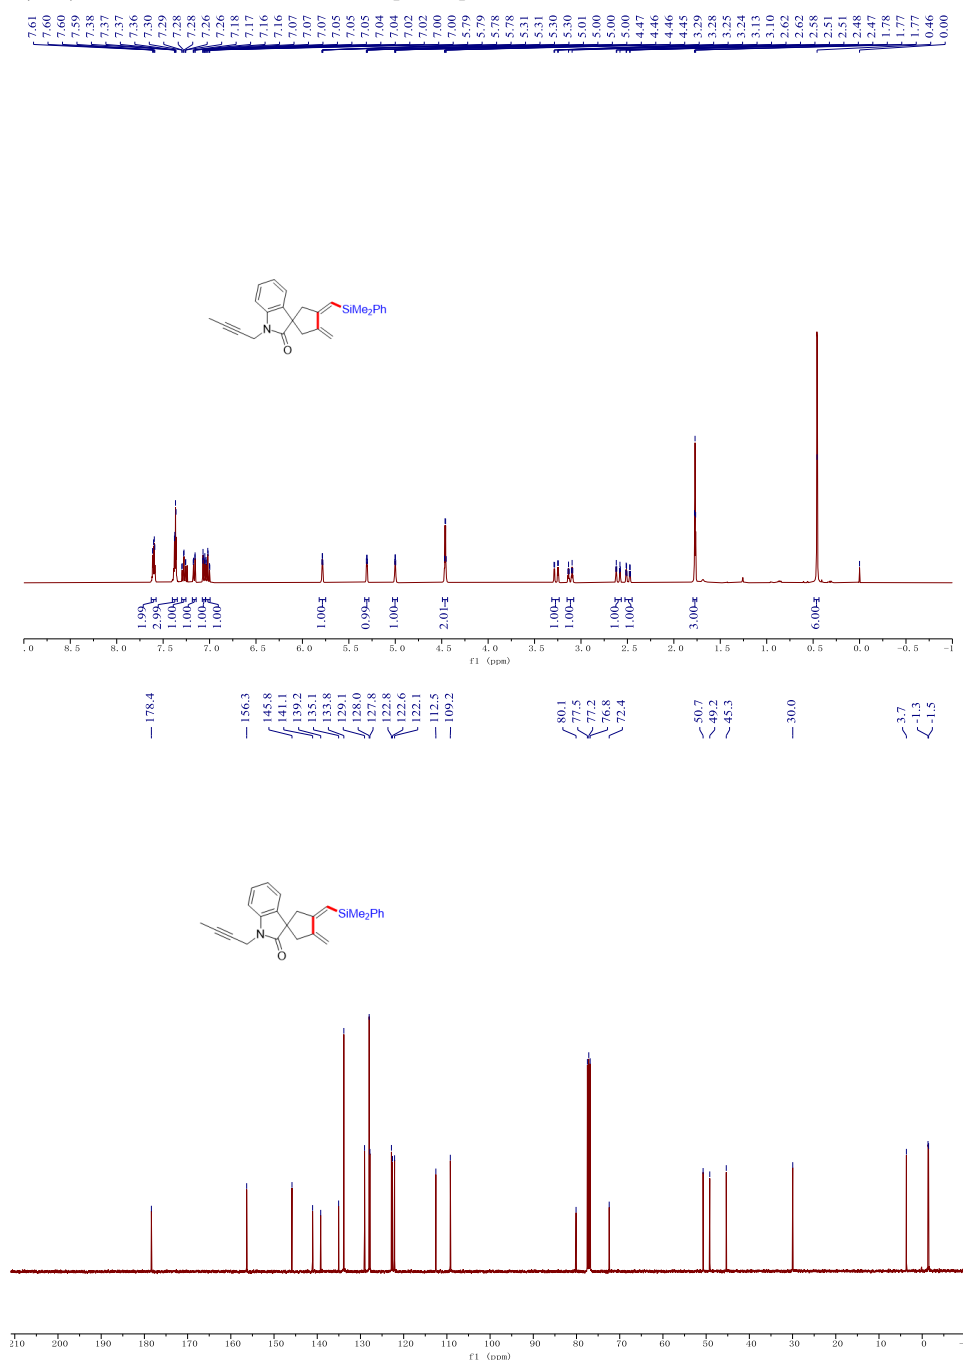

**(Z)-3-((dimethyl(phenyl)silyl)methylene)-4-methylenespiro[cyclopentane-1,2'-inden]-1'(3'H)-one (3o)**

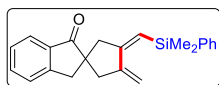

Prepared according to method E. The product **3o** was isolated in 79% yield (54.4 mg).

$^1\text{H NMR}$  (400 MHz,  $\text{CDCl}_3$ )  $\delta$  7.78 (d,  $J = 7.7$  Hz, 1H), 7.62 – 7.54 (m, 3H), 7.45 – 7.32 (m, 5H), 5.71 (s, 1H), 5.19 (d,  $J = 1.8$  Hz, 1H), 4.94 (s, 1H), 3.13 (dd,  $J = 15.6, 2.5$  Hz, 1H), 3.06 (d,  $J = 3.0$  Hz, 2H), 2.97 (dt,  $J = 14.9, 2.7$  Hz, 1H), 2.39 (d,  $J = 15.5$  Hz, 1H), 2.27 (d,  $J = 15.2$  Hz, 1H), 0.42 (s, 6H).

$^{13}\text{C NMR}$  (101 MHz,  $\text{CDCl}_3$ )  $\delta$  208.9, 157.2, 152.7, 146.6, 139.4, 136.5, 135.1, 133.9, 129.0, 127.9, 127.6, 126.7, 124.3, 121.1, 111.9, 53.9, 50.1, 46.4, 41.6, -1.2, -1.4.

**HRMS** (ESI):  $m/z$  Calcd. for  $\text{C}_{23}\text{H}_{25}\text{OSi}$   $[\text{M}+\text{H}]^+$ : 345.1675, found: 345.1674.

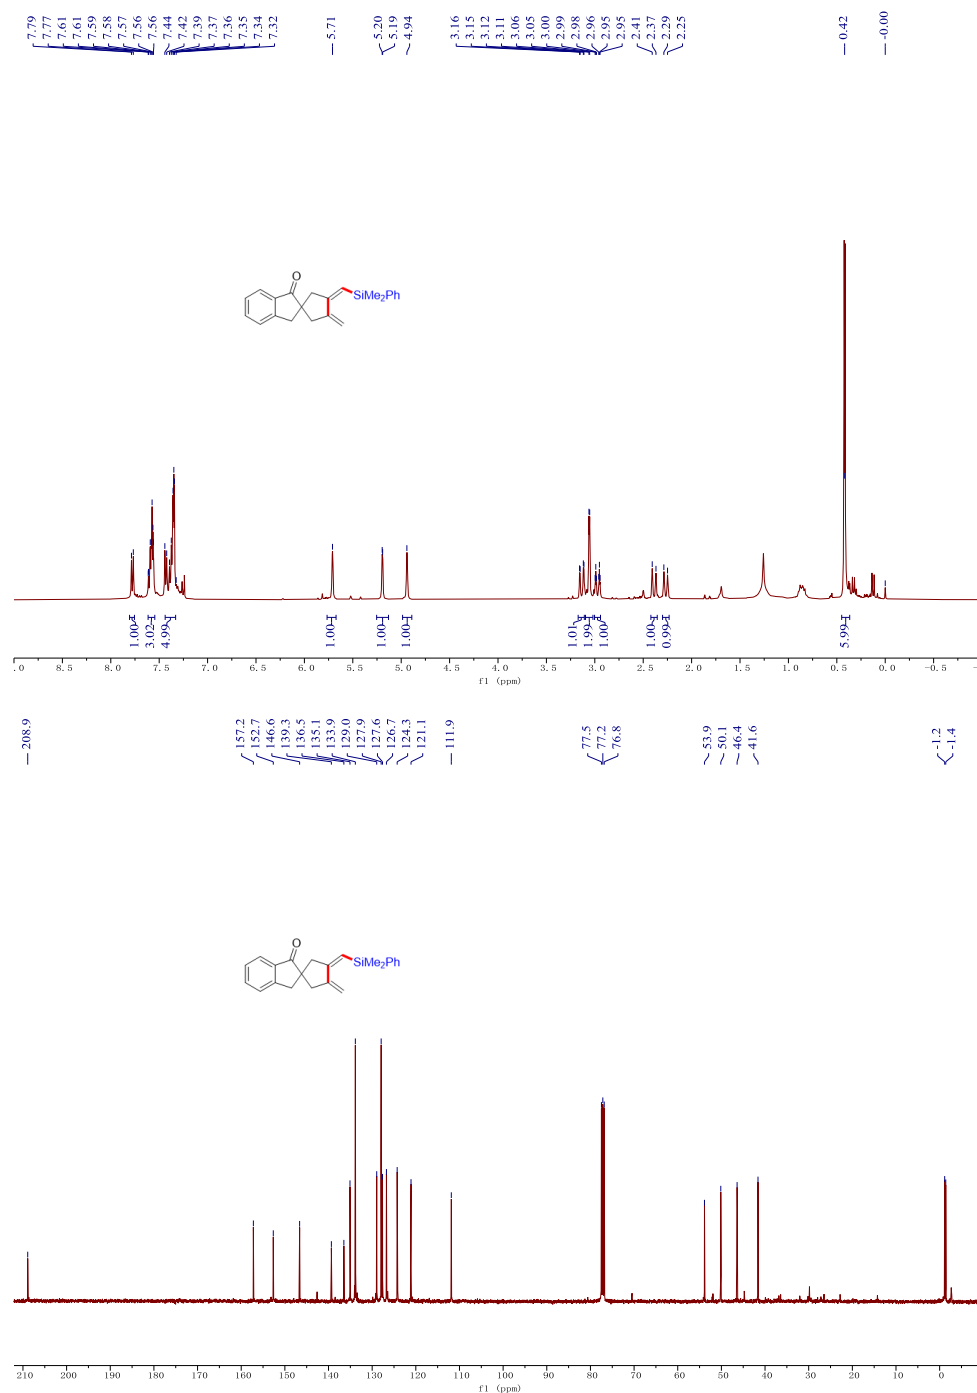

**(Z)-3-((dimethyl(phenyl)silyl)methylene)-6'-fluoro-4-methylenespiro[cyclopentane-1,2'-inden]-1'(3'H)-one (3p)**

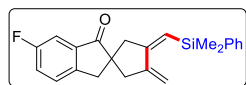

Prepared according to method **E**, and the product **3p** was obtained as yellow oil in 72% yield (51.9 mg).

**<sup>1</sup>H NMR** (400 MHz, CDCl<sub>3</sub>) δ 7.59 – 7.54 (m, 2H), 7.43 – 7.37 (m, 2H), 7.37 – 7.30 (m, 4H), 5.72 (s, 1H), 5.20 (d, *J* = 1.9 Hz, 1H), 4.95 (d, *J* = 1.1 Hz, 1H), 3.12 (dd, *J* = 15.6, 2.6 Hz, 1H), 3.02 (d, *J* = 3.2 Hz, 2H), 2.96 (dt, *J* = 14.9, 2.8 Hz, 1H), 2.40 (d, *J* = 15.5 Hz, 1H), 2.28 (d, *J* = 15.0 Hz, 1H), 0.42 (s, 3H), 0.41 (s, 3H).

**<sup>13</sup>C NMR** (101 MHz, CDCl<sub>3</sub>) δ 208.0 (d, *J* = 2.7 Hz), 162.6 (d, *J* = 248.2 Hz), 156.9, 148.0 (d, *J* = 2.0 Hz), 146.4, 139.3, 138.2 (d, *J* = 7.1 Hz), 133.9, 129.0, 128.1 (d, *J* = 7.9 Hz), 128.0, 122.8 (d, *J* = 23.7 Hz), 121.4, 112.0, 110.1 (d, *J* = 21.7 Hz), 54.9, 50.1, 46.4, 41.0, -1.2, -1.4.

**<sup>19</sup>F NMR** (376 MHz, CDCl<sub>3</sub>) δ -114.28.

**HRMS** (ESI): *m/z* Calcd. for C<sub>23</sub>H<sub>24</sub>FOSi [M+H]<sup>+</sup>: 363.1580, found: 363.1583.

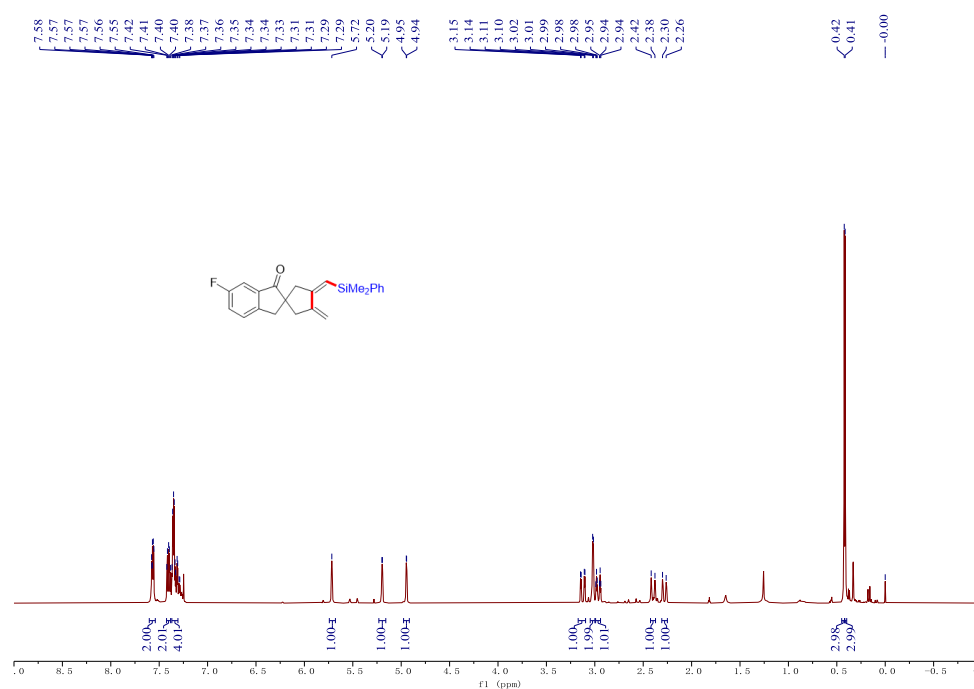

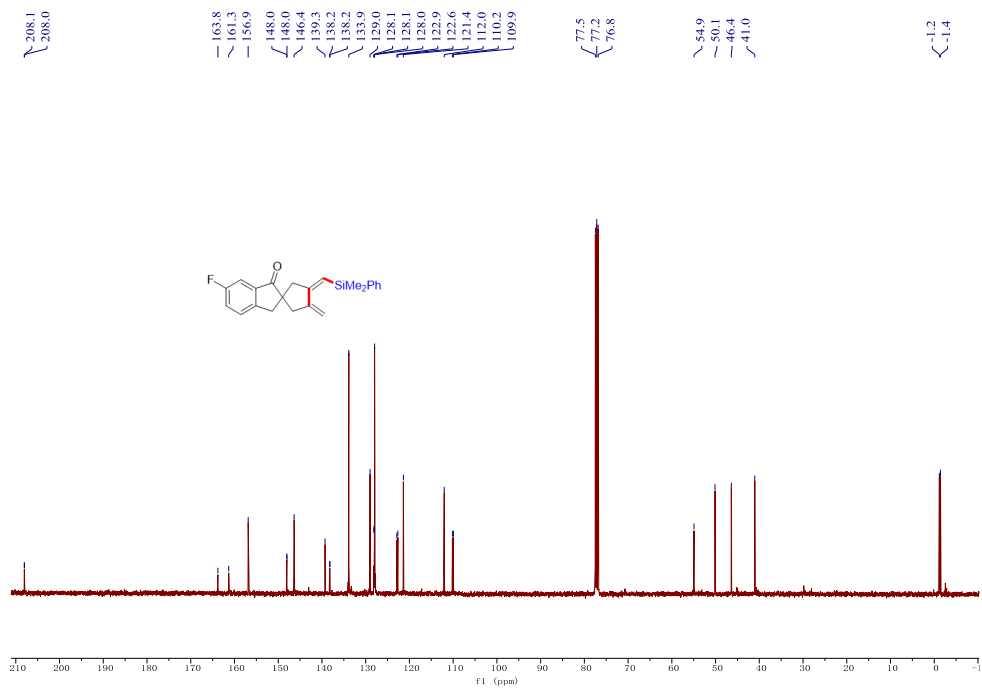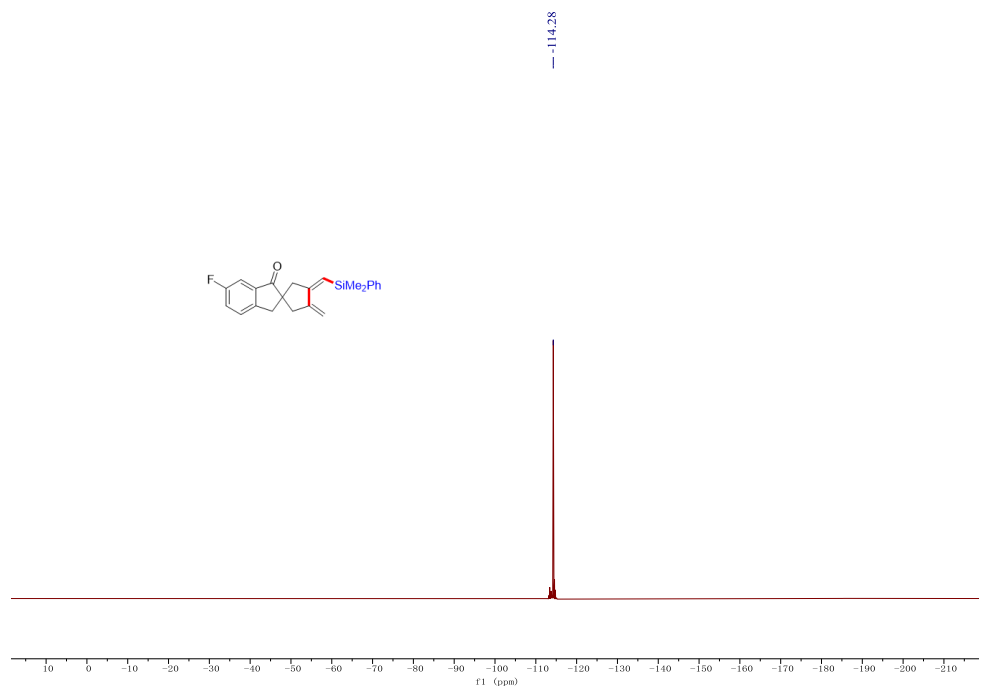



**(Z)-5'-bromo-3-((dimethyl(phenyl)silyl)methylene)-4-methylenespiro[cyclopentane-1,2'-inden]-1'(3'H)-one (3q)**

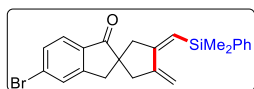

Prepared according to method E, and the product **3q** was obtained as yellow oil in 65% yield (55.0 mg).

$^1\text{H NMR}$  (400 MHz,  $\text{CDCl}_3$ )  $\delta$  7.65 – 7.60 (m, 2H), 7.59 – 7.48 (m, 3H), 7.38 – 7.33 (m, 3H), 5.71 (s, 1H), 5.19 (s, 1H), 4.95 (s, 1H), 3.12 (d,  $J = 15.5$  Hz, 1H), 3.04 (d,  $J = 1.8$  Hz, 2H), 2.96 (d,  $J = 15.1$  Hz, 1H), 2.38 (d,  $J = 15.8$  Hz, 1H), 2.26 (d,  $J = 15.0$  Hz, 1H), 0.42 (s, 6H).

$^{13}\text{C NMR}$  (101 MHz,  $\text{CDCl}_3$ )  $\delta$  207.7, 156.8, 154.3, 146.3, 139.3, 135.3, 133.9, 131.3, 130.5, 130.0, 129.0, 128.0, 125.5, 121.5, 112.1, 54.1, 50.1, 46.4, 41.3, -1.2, -1.4.

**HRMS** (ESI):  $m/z$  Calcd. for  $\text{C}_{23}\text{H}_{24}\text{OBrSi}$   $[\text{M}+\text{H}]^+$ : 423.0780, found: 423.0780.

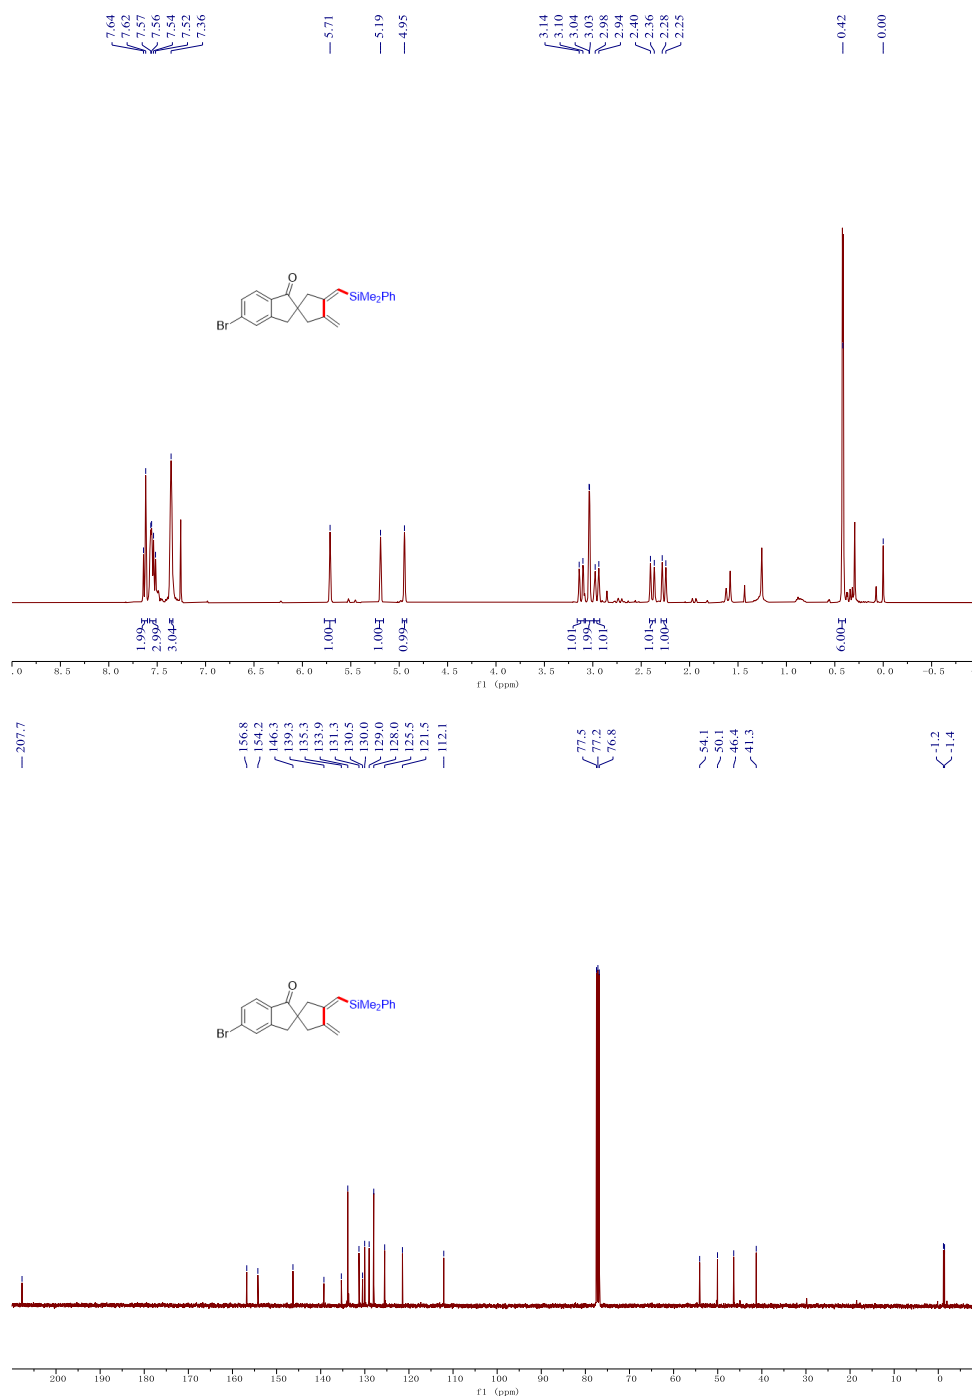

**(Z)-3-((dimethyl(phenyl)silyl)methylene)-6'-methoxy-4-methylenespiro[cyclopentane-1,2'-inden]-1'(3'H)-one (3r)**

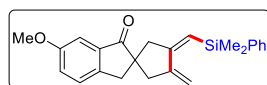

Prepared according to method E, and the product **3r** was obtained as yellow oil in 75% yield (55.8 mg).

**<sup>1</sup>H NMR** (400 MHz, CDCl<sub>3</sub>) δ 7.60 – 7.54 (m, 2H), 7.38 – 7.30 (m, 4H), 7.23 – 7.18 (m, 2H), 5.70 (s, 1H), 5.18 (d, *J* = 1.9 Hz, 1H), 4.94 (s, 1H), 3.84 (s, 3H), 3.13 (dd, *J* = 15.7, 2.4 Hz, 1H), 3.01 – 2.92 (m, 3H), 2.39 (d, *J* = 15.5 Hz, 1H), 2.27 (d, *J* = 14.9 Hz, 1H), 0.42 (s, 3H), 0.41 (s, 3H).

**<sup>13</sup>C NMR** (101 MHz, CDCl<sub>3</sub>) δ 209.0, 159.7, 157.3, 146.7, 145.5, 139.4, 137.6, 133.9, 129.0, 128.0, 127.5, 124.5, 121.0, 111.9, 105.4, 55.8, 54.8, 50.2, 46.5, 41.0, -1.2, -1.4.

**HRMS** (ESI): *m/z* Calcd. for C<sub>24</sub>H<sub>27</sub>O<sub>2</sub>Si [M+H]<sup>+</sup>: 375.1780, found: 375.1782.

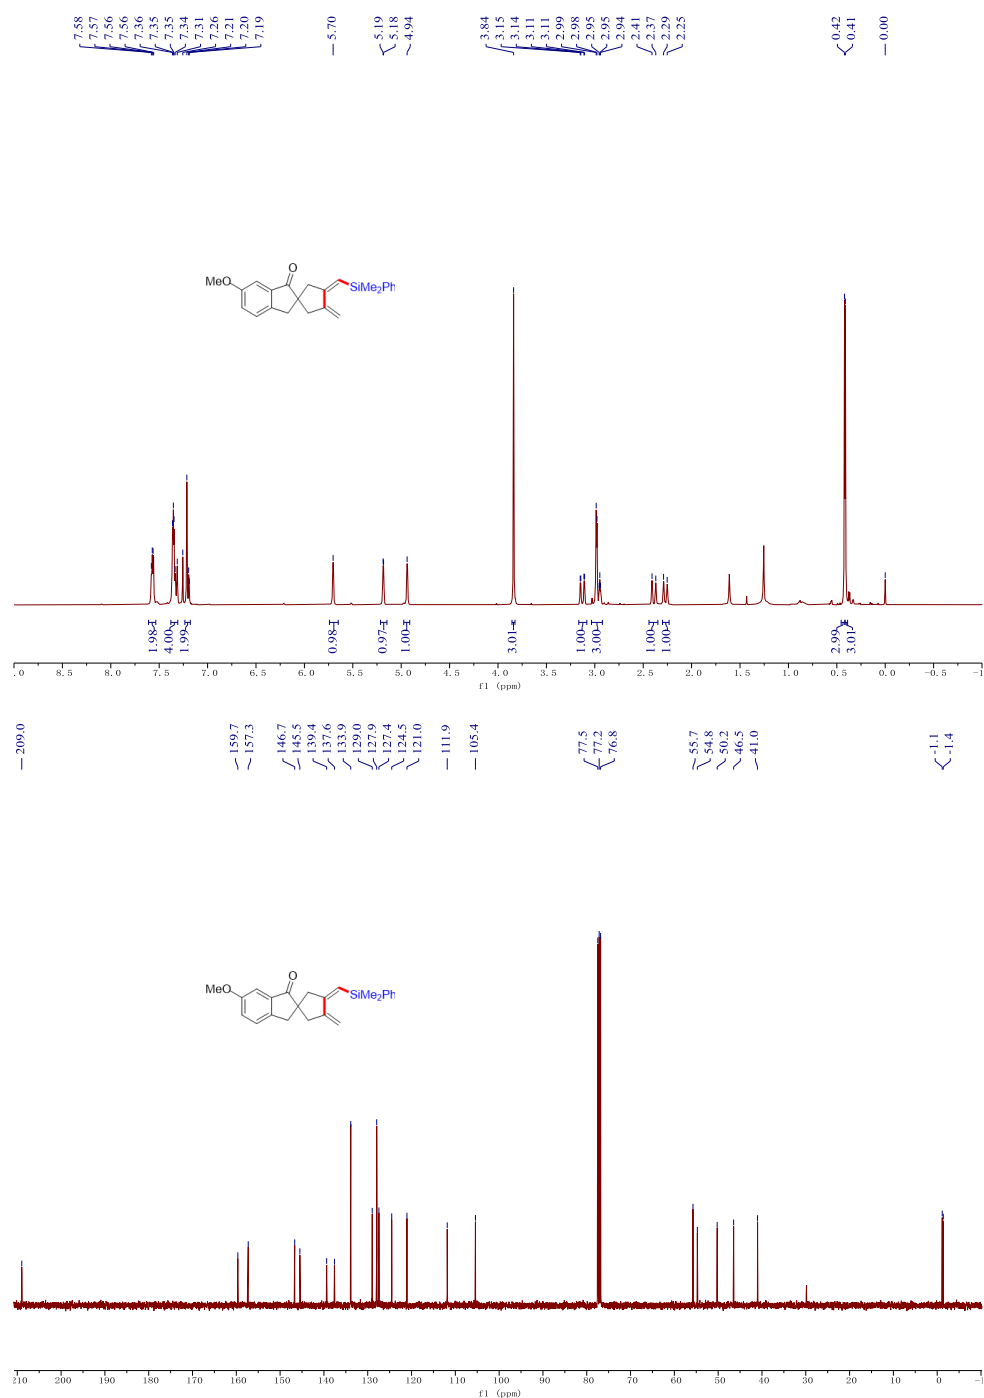

**(Z)-3-((dimethyl(phenyl)silyl)methylene)-4-methylene-3',4'-dihydro-2'H-spiro[cyclopentane-1,1'-naphthalen]-2'-one (3s)**

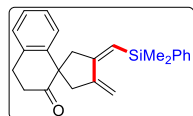

Prepared according to method E, and the product **3s** was obtained as yellow solid in 81% yield (58.2 mg).

**<sup>1</sup>H NMR** (400 MHz, CDCl<sub>3</sub>) δ 7.57 – 7.50 (m, 2H), 7.37 – 7.31 (m, 3H), 7.30 – 7.26 (m, 1H), 7.24 – 7.17 (m, 3H), 5.67 (d, *J* = 2.1 Hz, 1H), 5.18 (s, 1H), 4.91 (d, *J* = 2.2 Hz, 1H), 3.35 (dd, *J* = 16.0, 2.6 Hz, 1H), 3.26 (dt, *J* = 15.9, 2.8 Hz, 1H), 3.12 – 3.04 (m, 2H), 2.75 (d, *J* = 16.0 Hz, 1H), 2.70 – 2.62 (m, 3H), 0.40 (s, 3H), 0.38 (s, 3H).

**<sup>13</sup>C NMR** (101 MHz, CDCl<sub>3</sub>) δ 212.8, 157.1, 146.2, 141.6, 139.2, 136.1, 133.9, 128.9, 128.1, 127.9, 127.0, 126.8, 126.6, 121.1, 111.8, 55.9, 49.7, 45.2, 37.4, 28.2, -1.1, -1.5.

**HRMS** (ESI): *m/z* Calcd. for C<sub>24</sub>H<sub>27</sub>OSi [M+H]<sup>+</sup>: 359.1831, found: 359.1830.

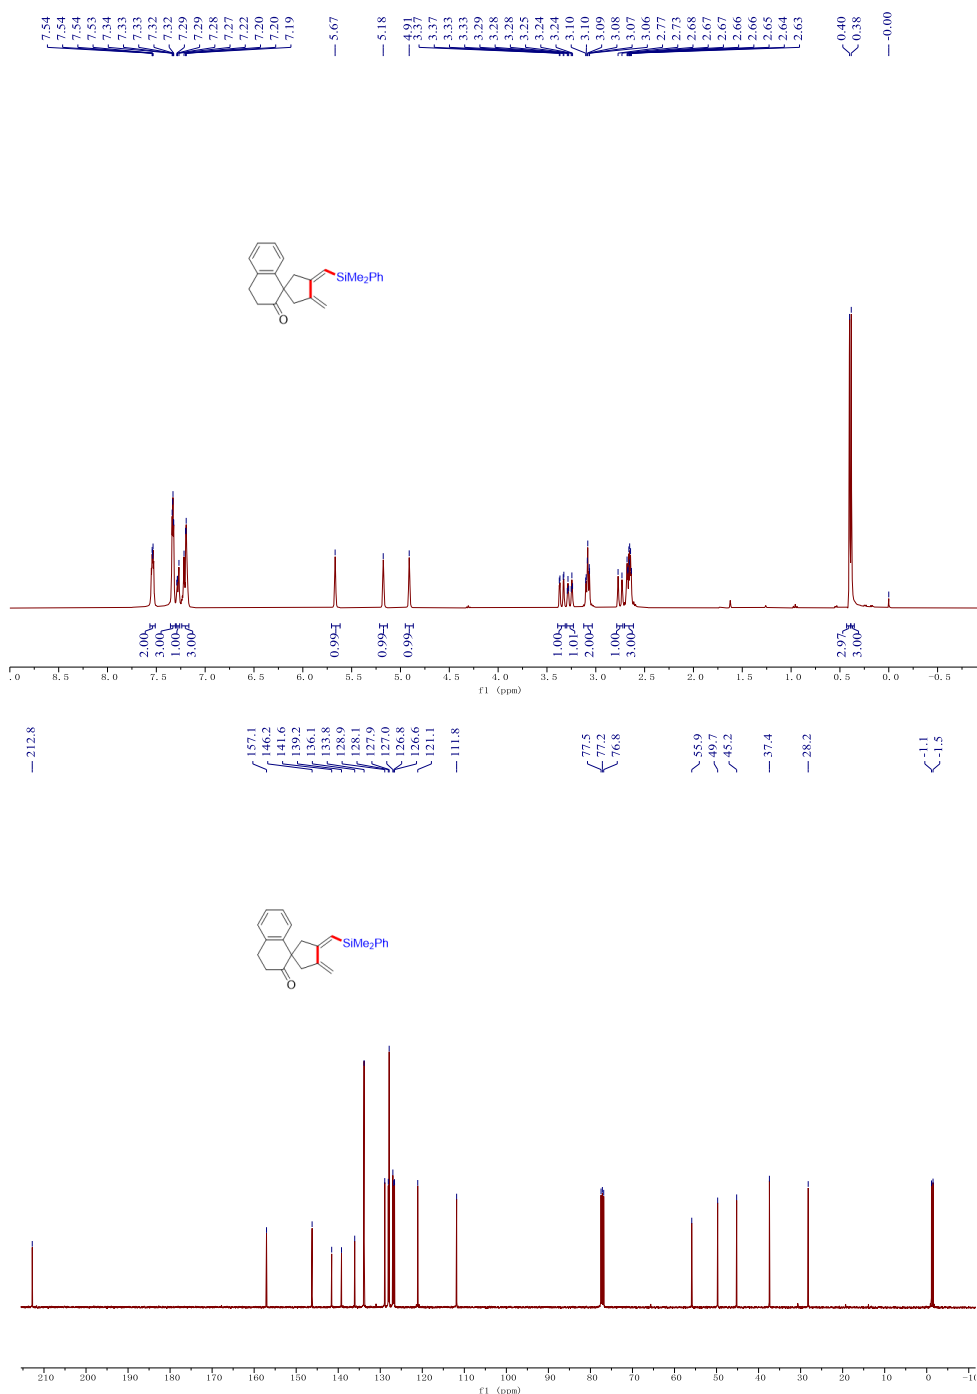

**(Z)-3-((dimethyl(phenyl)silyl)methylene)-4-methylene-3',4'-dihydro-1'H-spiro[cyclopentane-1,2'-naphthalen]-1'-one (3t)**

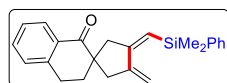

Prepared according to **E**, and the product **3t** was obtained as yellow oil in 94% yield (67.0 mg).

**<sup>1</sup>H NMR** (400 MHz, CDCl<sub>3</sub>) δ 8.05 (dd, *J* = 7.8, 1.0 Hz, 1H), 7.58 – 7.53 (m, 2H), 7.46 (td, *J* = 7.5, 1.4 Hz, 1H), 7.36 – 7.27 (m, 4H), 7.22 (d, *J* = 7.7 Hz, 1H), 5.68 (s, 1H), 5.17 (t, *J* = 2.0 Hz, 1H), 4.92 (s, 1H), 3.12 (dd, *J* = 16.1, 2.2 Hz, 1H), 3.02 – 2.95 (m, 3H), 2.53 (d, *J* = 16.1 Hz, 1H), 2.41 (dd, *J* = 15.5, 1.4 Hz, 1H), 2.08 – 2.02 (m, 2H), 0.41 (s, 3H), 0.40 (s, 3H).

**<sup>13</sup>C NMR** (101 MHz, CDCl<sub>3</sub>) δ 200.7, 157.2, 146.4, 143.6, 139.5, 133.9, 133.4, 132.0, 128.9, 128.8, 128.1, 127.9, 126.8, 121.1, 112.0, 49.8, 46.9, 43.1, 32.6, 26.0, -1.2, -1.4.

**HRMS** (ESI): *m/z* Calcd. for C<sub>24</sub>H<sub>27</sub>OSi [M+H]<sup>+</sup>: 359.1831, found: 359.1831.

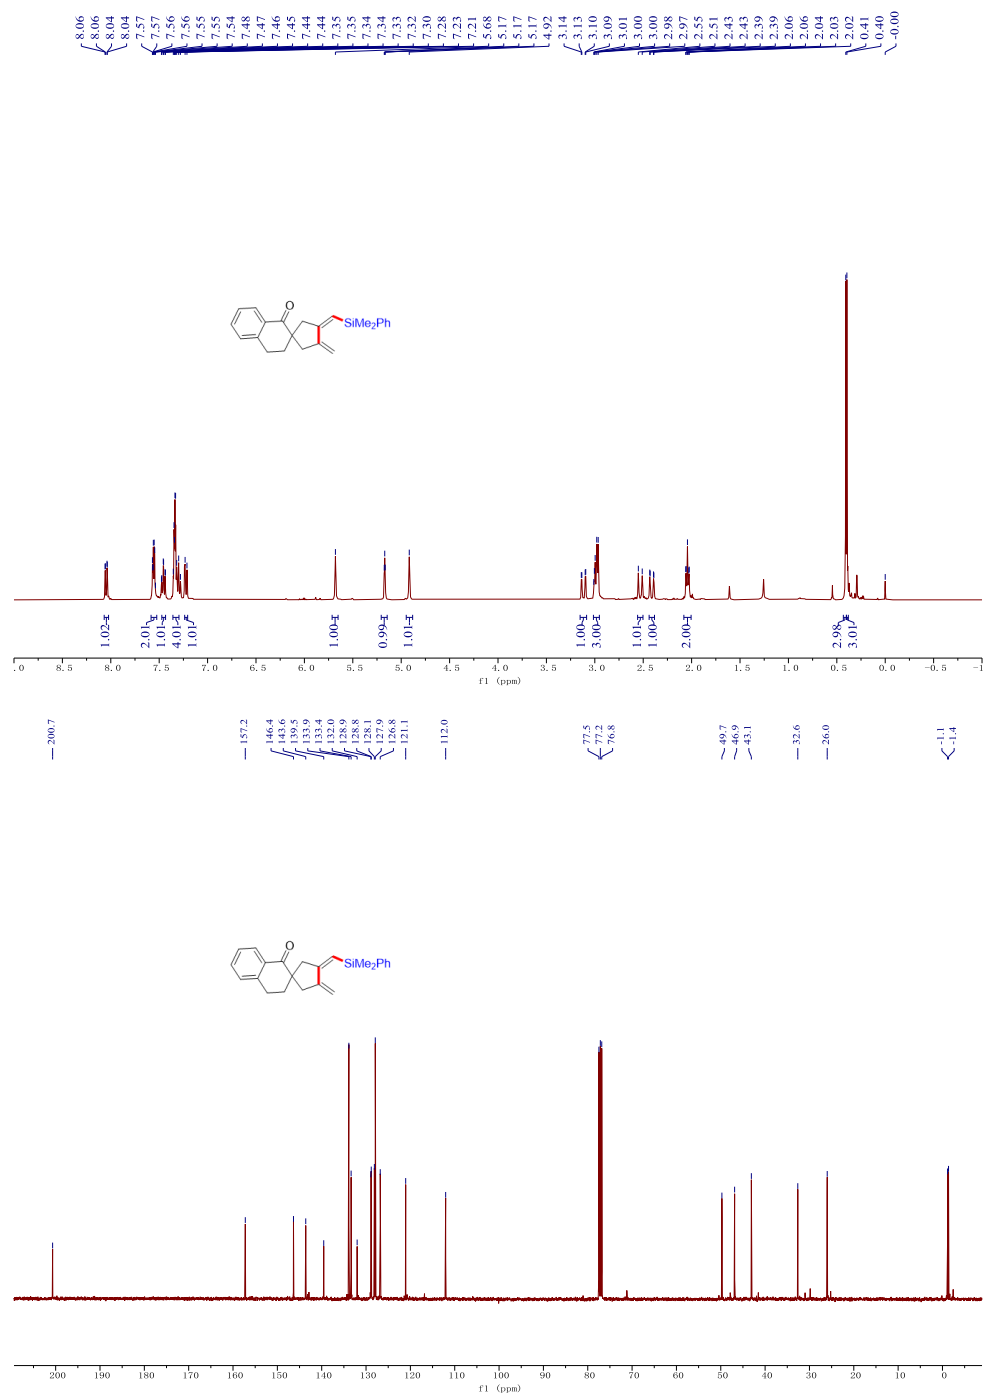

**(Z)-7'-chloro-3-((dimethyl(phenyl)silyl)methylene)-4-methylene-3',4'-dihydro-1'H-spiro[cyclopentane-1,2'-naphthalen]-1'-one (3u)**

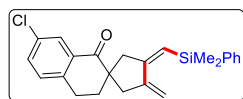

Prepared according to method **E**, and the product **3u** was obtained as yellow oil in 92% yield (71.9 mg).

**<sup>1</sup>H NMR** (400 MHz, CDCl<sub>3</sub>) δ 8.00 (d, *J* = 2.3 Hz, 1H), 7.58 – 7.52 (m, 2H), 7.41 (dd, *J* = 8.2, 2.3 Hz, 1H), 7.36 – 7.32 (m, 3H), 7.18 (d, *J* = 8.2 Hz, 1H), 5.68 (s, 1H), 5.17 (t, *J* = 2.0 Hz, 1H), 4.92 (s, 1H), 3.08 (dd, *J* = 16.1, 2.2 Hz, 1H), 2.99 – 2.91 (m, 3H), 2.52 (d, *J* = 16.2 Hz, 1H), 2.40 (dd, *J* = 15.5, 1.4 Hz, 1H), 2.06 – 2.01 (m, 2H), 0.41 (s, 3H), 0.39 (s, 3H).

**<sup>13</sup>C NMR** (101 MHz, CDCl<sub>3</sub>) δ 199.5, 156.8, 146.1, 141.8, 139.5, 133.9, 133.3, 133.2, 133.0, 130.4, 128.9, 127.9, 127.8, 121.3, 112.2, 49.6, 46.7, 43.0, 32.4, 25.5, -1.2, -1.4.

**HRMS** (ESI): *m/z* Calcd. for C<sub>24</sub>H<sub>26</sub>OCISi [M+H]<sup>+</sup>: 393.1441, found: 393.1432.

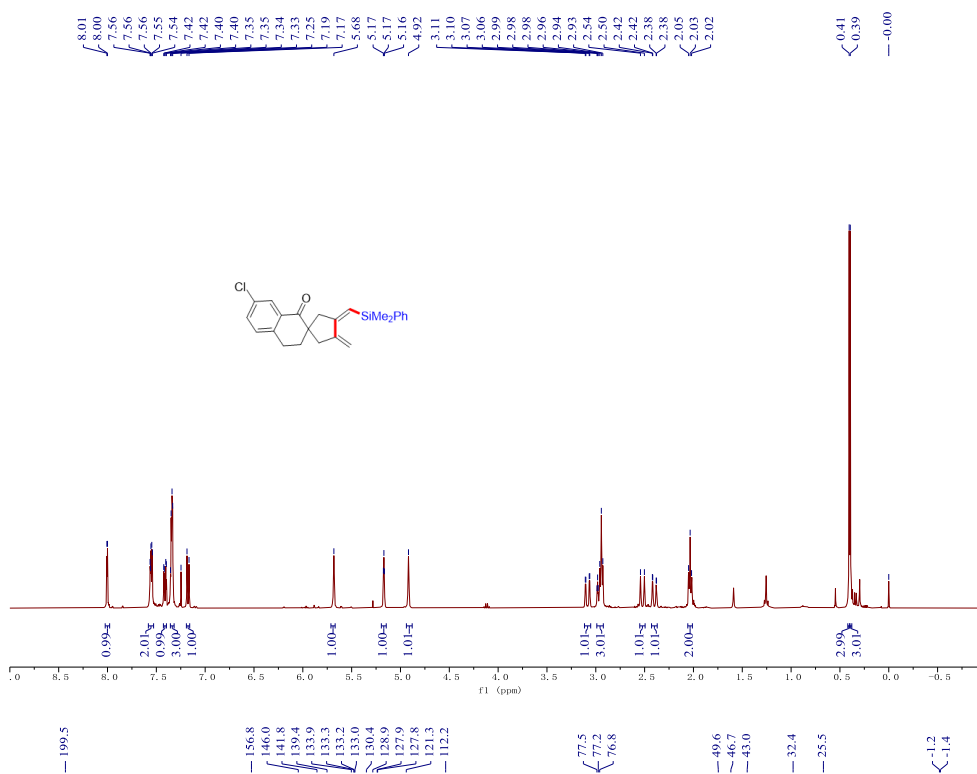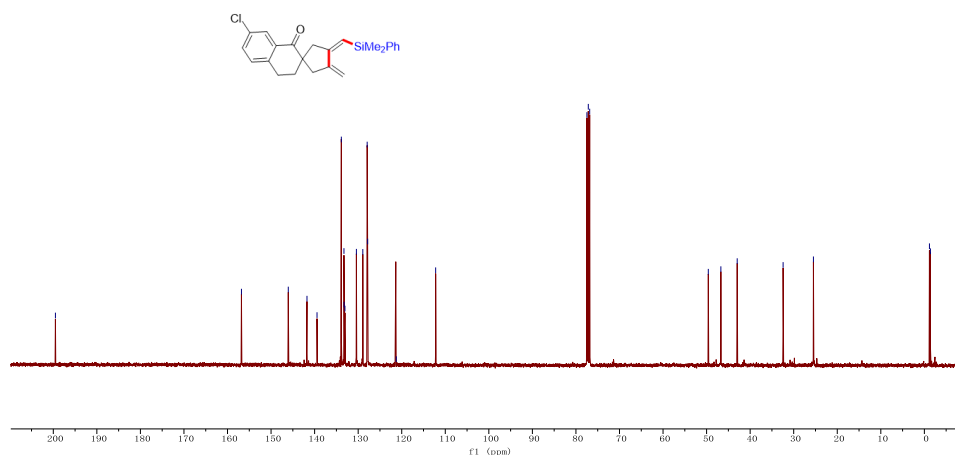

**(Z)-3-((dimethyl(phenyl)silyl)methylene)-6'-methoxy-4-methylene-3',4'-dihydro-1'H-spiro[cyclopentane-1,2'-naphthalen]-1'-one (3v)**

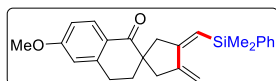

Prepared according to method E, and the product **3v** was obtained as yellow oil in 89% yield (69.0 mg).

**<sup>1</sup>H NMR** (400 MHz, CDCl<sub>3</sub>) δ 8.02 (d, *J* = 8.8 Hz, 1H), 7.59 – 7.53 (m, 2H), 7.37 – 7.29 (m, 3H), 6.82 (dd, *J* = 8.8, 2.6 Hz, 1H), 6.67 (d, *J* = 2.5 Hz, 1H), 5.67 (d, *J* = 1.9 Hz, 1H), 5.16 (t, *J* = 2.1 Hz, 1H), 4.91 (s, 1H), 3.84 (s, 3H), 3.12 (dd, *J* = 16.1, 2.4 Hz, 1H), 3.02 – 2.91 (m, 3H), 2.50 (d, *J* = 16.1 Hz, 1H), 2.39 (dd, *J* = 15.5, 1.5 Hz, 1H), 2.04 – 1.98 (m, 2H), 0.41 (s, 3H), 0.39 (s, 3H).  
**<sup>13</sup>C NMR** (101 MHz, CDCl<sub>3</sub>) δ 199.5, 163.6, 157.5, 146.5, 146.1, 139.6, 133.9, 130.6, 128.9, 127.9, 125.7, 120.9, 113.4, 112.5, 112.0, 55.5, 49.5, 47.0, 43.2, 32.7, 26.4, -1.1, -1.4.

**HRMS** (ESI): *m/z* Calcd. for C<sub>25</sub>H<sub>29</sub>O<sub>2</sub>Si [M+H]<sup>+</sup>: 389.1937, found: 389.1937.

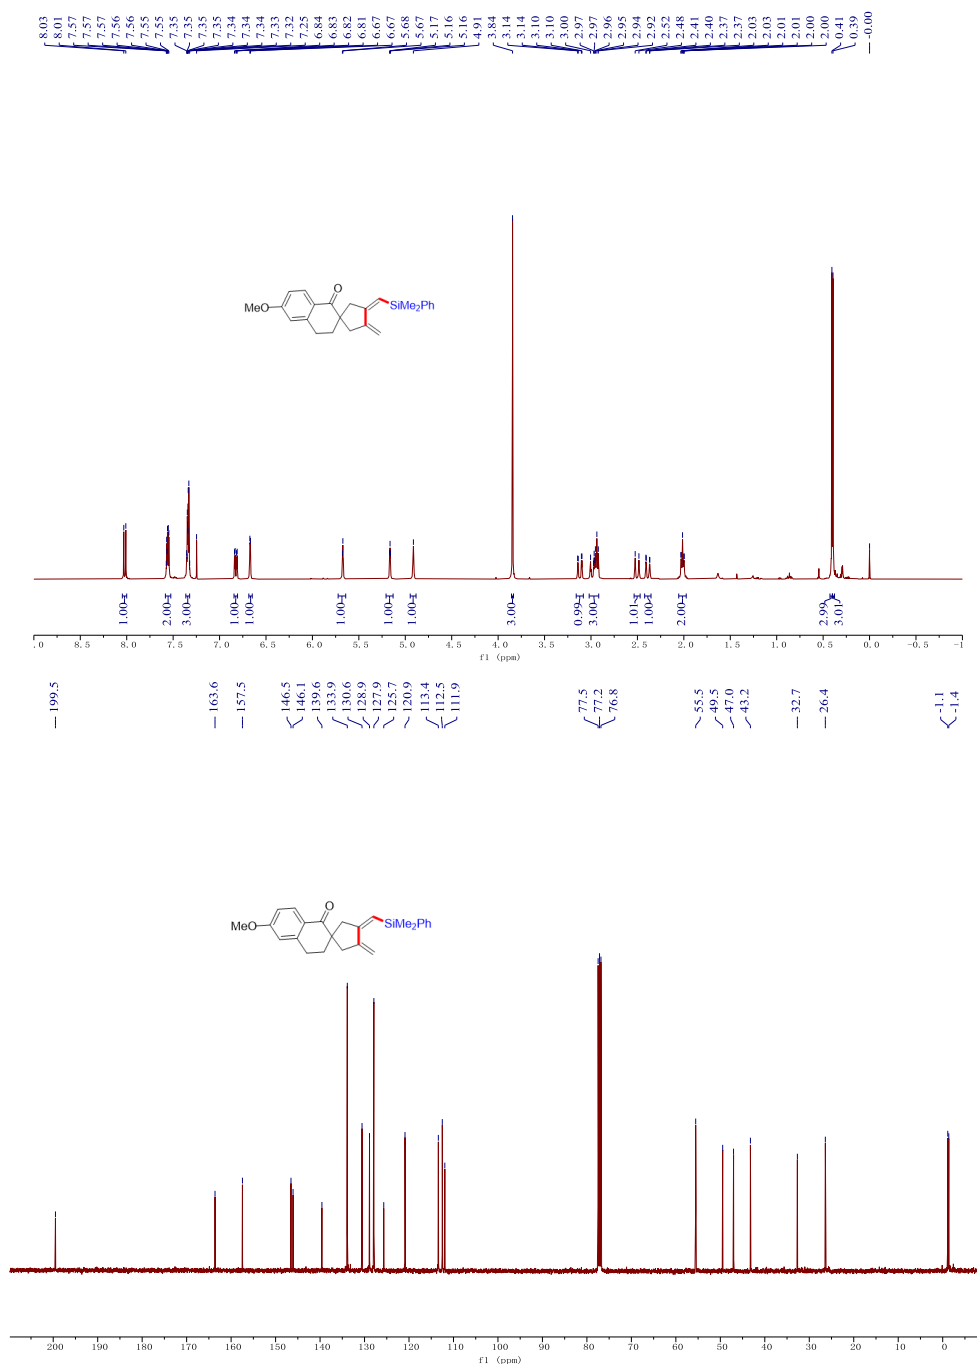

**(Z)-2'-benzyl-3-((dimethyl(phenyl)silyl)methylene)-4-methylene-1',2'-dihydro-3'H-spiro[cyclopentane-1,4'-isoquinolin]-3'-one (3w)**

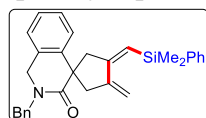

Prepared according to method E. The product **3w** was obtained as colorless oil in 67% yield (60.2 mg).

$^1\text{H NMR}$  (400 MHz,  $\text{CDCl}_3$ )  $\delta$  7.57 – 7.51 (m, 2H), 7.36 – 7.16 (m, 11H), 7.08 – 7.03 (m, 1H), 5.74 – 5.66 (m, 1H), 5.20 (dd,  $J = 3.2, 1.5$  Hz, 1H), 4.93 (dd,  $J = 2.8, 1.4$  Hz, 1H), 4.77 (s, 2H), 4.38 (d,  $J = 15.7$  Hz, 1H), 4.33 (d,  $J = 15.8$  Hz, 1H), 3.58 (dd,  $J = 15.9, 2.7$  Hz, 1H), 3.51 (dt,  $J = 15.8, 2.9$  Hz, 1H), 2.76 (dt,  $J = 15.9, 1.8$  Hz, 1H), 2.69 (dq,  $J = 15.8, 1.7$  Hz, 1H), 0.41 (s, 3H), 0.39 (s, 3H).

$^{13}\text{C NMR}$  (101 MHz,  $\text{CDCl}_3$ )  $\delta$  173.1, 157.2, 146.3, 140.4, 139.3, 137.0, 133.9, 131.4, 129.0, 128.9, 128.0, 127.9, 127.7, 127.6, 126.7, 125.8, 125.5, 121.1, 111.9, 51.1, 50.1, 49.7, 48.7, 44.4, -1.1, -1.5.

**HRMS** (ESI):  $m/z$  Calcd. for  $\text{C}_{30}\text{H}_{32}\text{NOSi}$   $[\text{M}+\text{H}]^+$ : 450.2253, found: 450.2256.

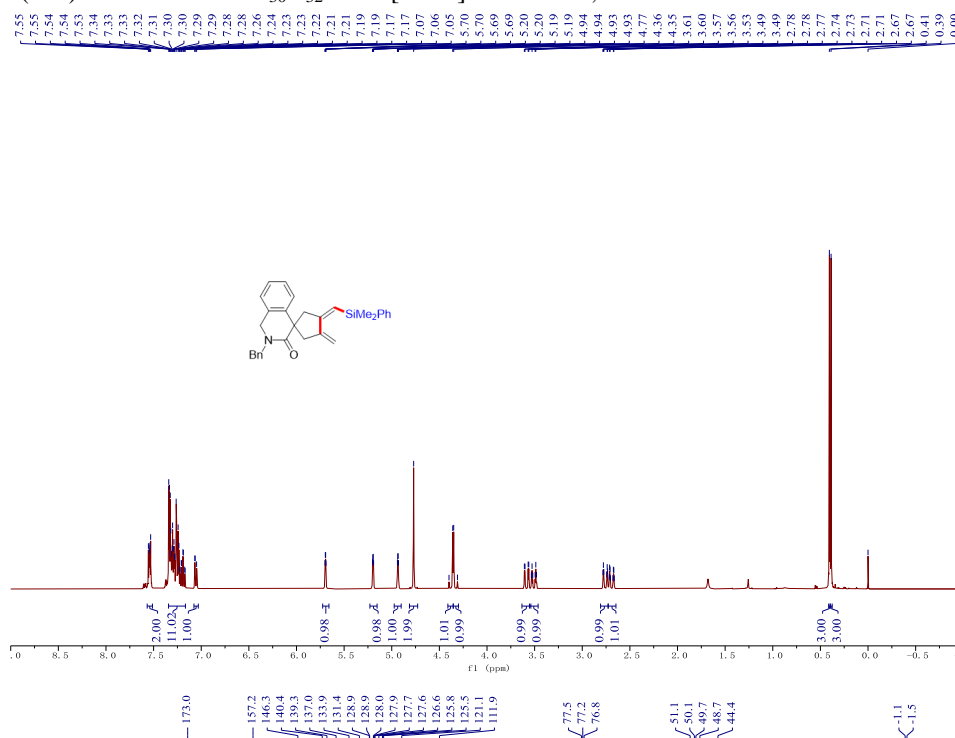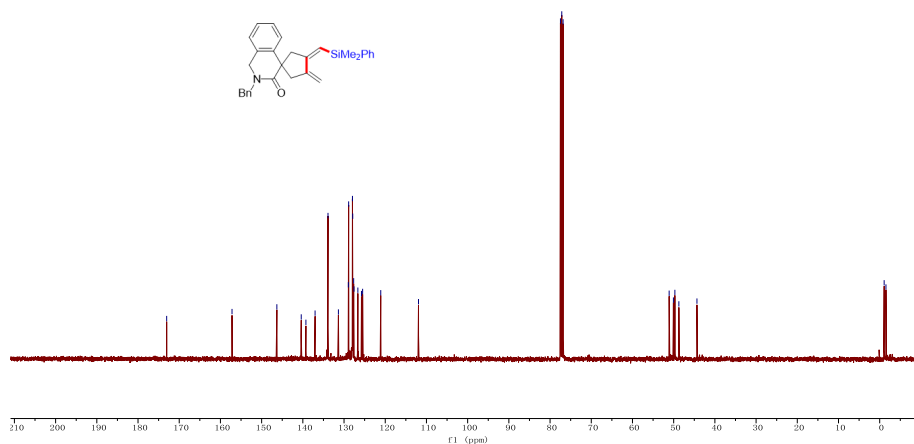

**(Z)-dimethyl((3-methylenespiro[cyclopentane-1,9'-fluoren]-4-ylidene)methyl)(phenyl)silane**  
**(3x)**

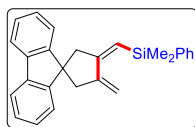

Prepared according to method E. The product **3x** was obtained as yellow oil in 99% yield (74.8 mg).

$^1\text{H NMR}$  (400 MHz,  $\text{CDCl}_3$ )  $\delta$  7.70 (d,  $J = 7.4$  Hz, 2H), 7.67 – 7.62 (m, 2H), 7.45 – 7.37 (m, 5H), 7.33 (t,  $J = 7.4$  Hz, 2H), 7.27 (t,  $J = 7.3$  Hz, 2H), 5.82 (s, 1H), 5.38 (s, 1H), 5.04 (s, 1H), 3.01 (s, 2H), 2.89 (s, 2H), 0.50 (s, 6H).

$^{13}\text{C NMR}$  (101 MHz,  $\text{CDCl}_3$ )  $\delta$  158.4, 151.5, 147.5, 139.8, 139.4, 133.9, 129.1, 128.0, 127.5, 127.3, 123.0, 121.6, 119.9, 112.3, 53.6, 51.3, 47.1, -1.4.

**HRMS** (ESI):  $m/z$  Calcd. for  $\text{C}_{27}\text{H}_{27}\text{Si}$   $[\text{M}+\text{H}]^+$ : 379.1882, found: 379.1890.

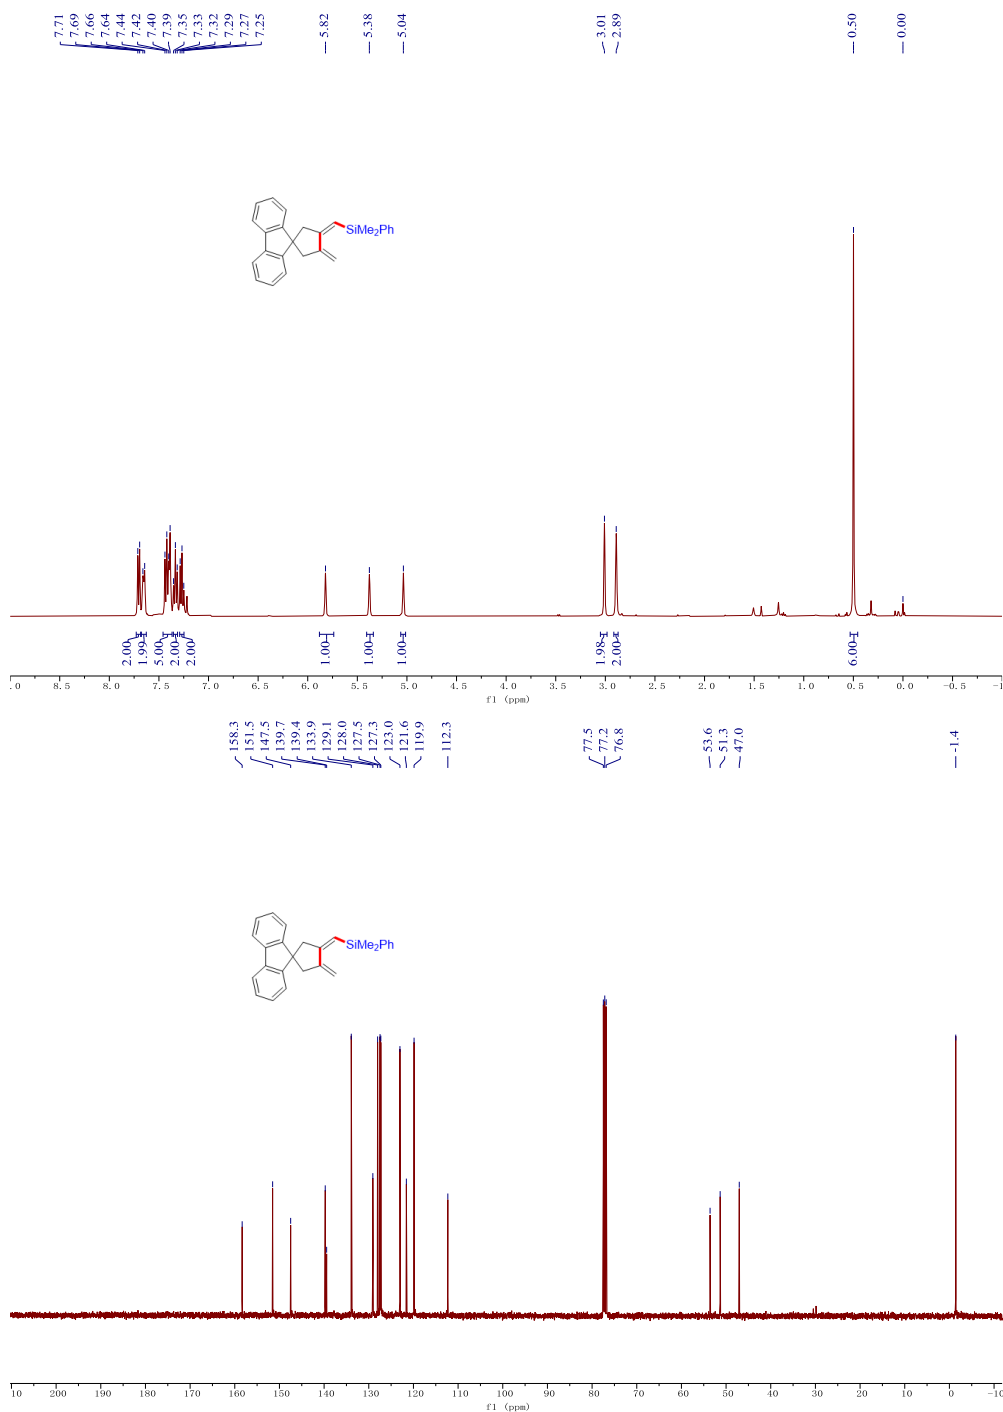



**(Z)-2-((dimethyl(phenyl)silyl)methylene)-8,8-dimethyl-3-methylenespiro[4.5]decane-6,10-dione (3y)**

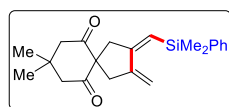

Prepared according to method E, and the product **3y** was obtained as white solid in 96% yield (67.6 mg).

$^1\text{H NMR}$  (400 MHz,  $\text{CDCl}_3$ )  $\delta$  7.55 – 7.49 (m, 2H), 7.35 – 7.31 (m, 3H), 5.64 (t,  $J = 1.9$  Hz, 1H), 5.09 (t,  $J = 2.2$  Hz, 1H), 4.89 (t,  $J = 1.9$  Hz, 1H), 3.00 (d,  $J = 1.9$  Hz, 2H), 2.89 (t,  $J = 2.0$  Hz, 2H), 2.64 – 2.60 (m, 4H), 1.01 (s, 3H), 0.99 (s, 3H), 0.37 (s, 6H).

$^{13}\text{C NMR}$  (101 MHz,  $\text{CDCl}_3$ )  $\delta$  207.1, 155.2, 144.9, 139.3, 133.9, 129.0, 127.9, 121.4, 112.0, 68.0, 51.8, 44.1, 40.1, 30.9, 28.7, 28.5, -1.3.

**HRMS** (ESI):  $m/z$  Calcd. for  $\text{C}_{22}\text{H}_{29}\text{O}_2\text{Si}$   $[\text{M}+\text{H}]^+$ : 353.1937, found: 353.1940.

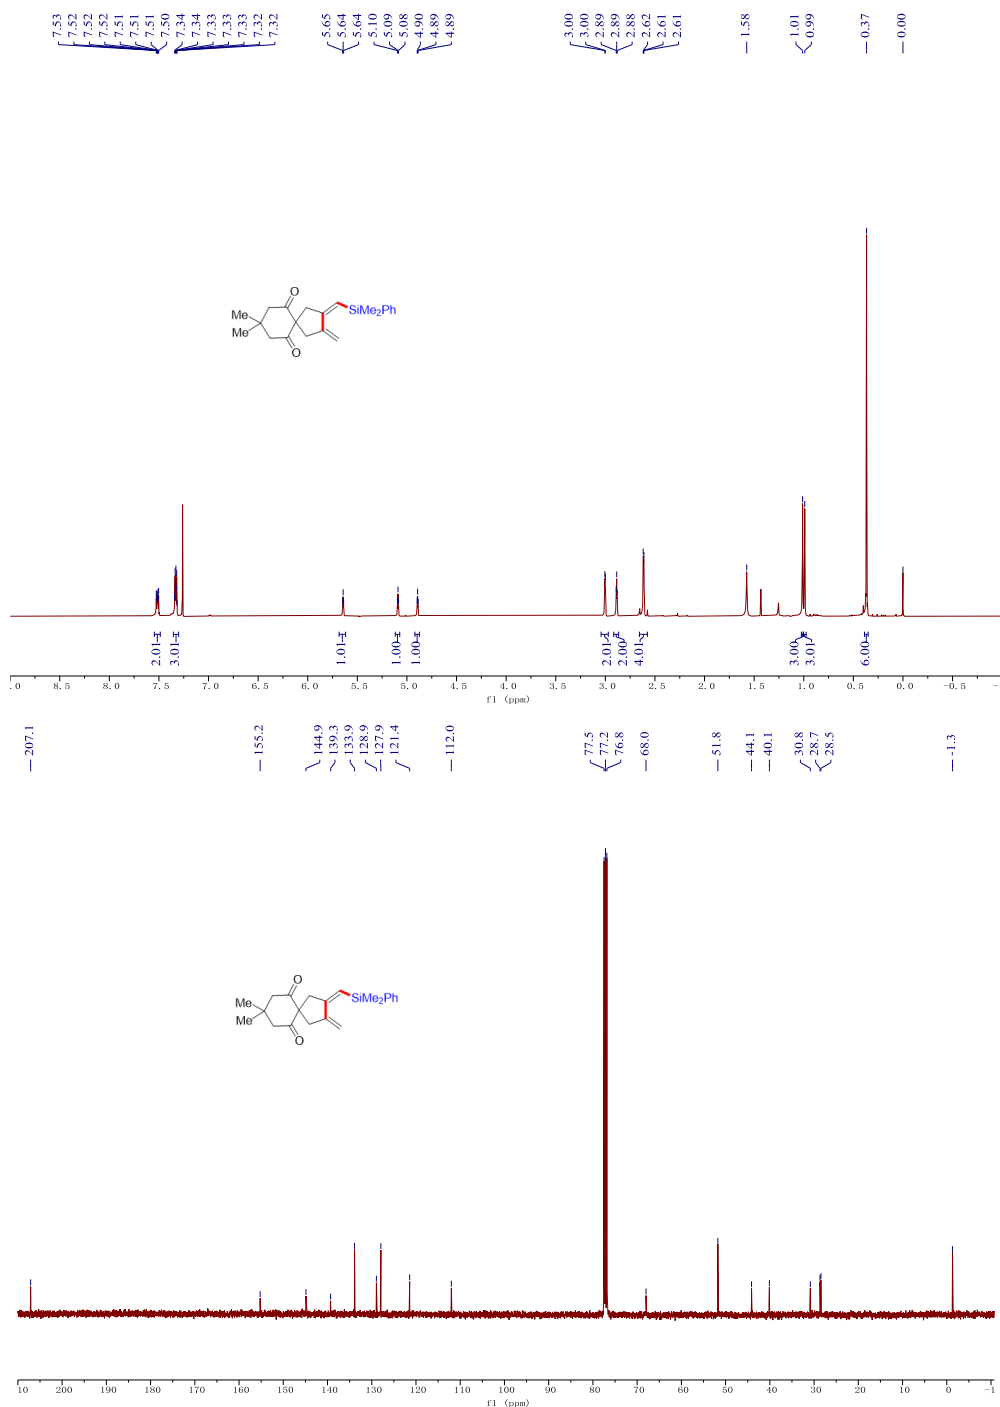

**(Z)-((8,8-dimethyl-3-methylene-7,9-dioxaspiro[4.5]decan-2-ylidene)methyl)dimethyl(phenyl)silane (3z)**

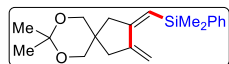

Prepared according to method E. The product **3z** was obtained as yellow oil in 82% yield (53.7 mg).

$^1\text{H NMR}$  (400 MHz,  $\text{CDCl}_3$ )  $\delta$  7.54 – 7.49 (m, 2H), 7.36 – 7.29 (m, 3H), 5.67 (t,  $J = 2.0$  Hz, 1H), 5.12 (t,  $J = 2.3$  Hz, 1H), 4.89 (t,  $J = 2.0$  Hz, 1H), 3.62 (s, 4H), 2.50 (d,  $J = 2.0$  Hz, 2H), 2.38 (d,  $J = 2.3$  Hz, 2H), 1.43 (d,  $J = 3.3$  Hz, 6H), 0.37 (s, 6H).

$^{13}\text{C NMR}$  (101 MHz,  $\text{CDCl}_3$ )  $\delta$  157.2, 146.2, 139.5, 133.8, 128.9, 127.9, 121.6, 112.4, 98.0, 68.3, 45.6, 41.6, 38.4, 24.0, 23.9, -1.3.

**HRMS** (ESI):  $m/z$  Calcd. for  $\text{C}_{20}\text{H}_{29}\text{O}_2\text{Si}$   $[\text{M}+\text{H}]^+$ : 329.1937, found: 329.1922.

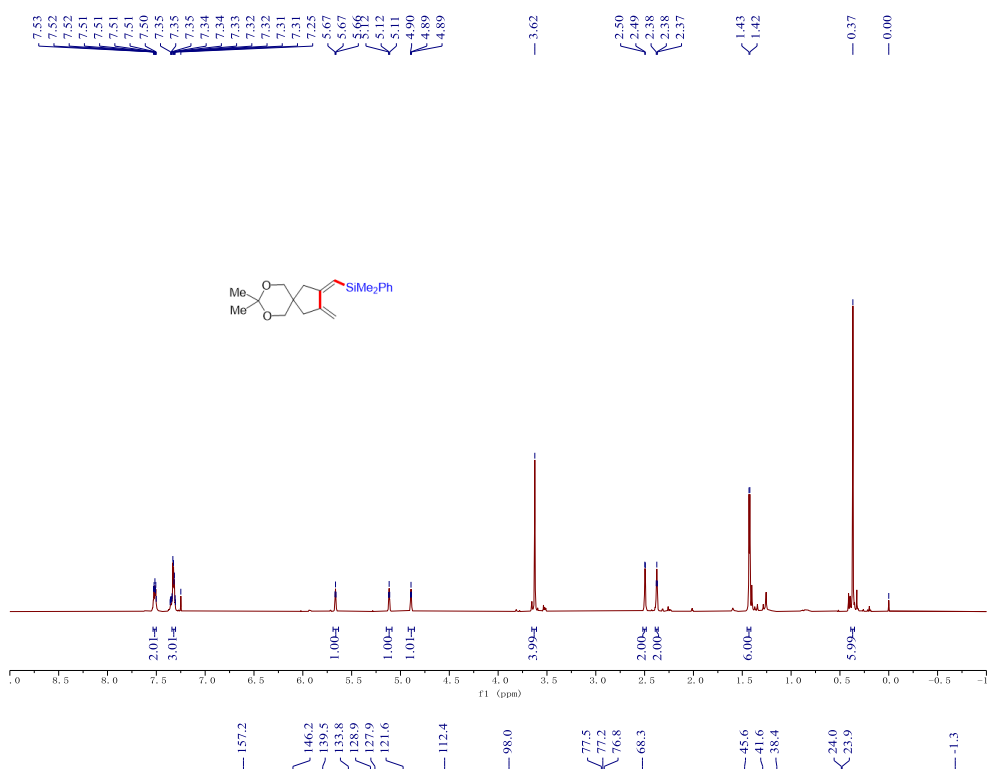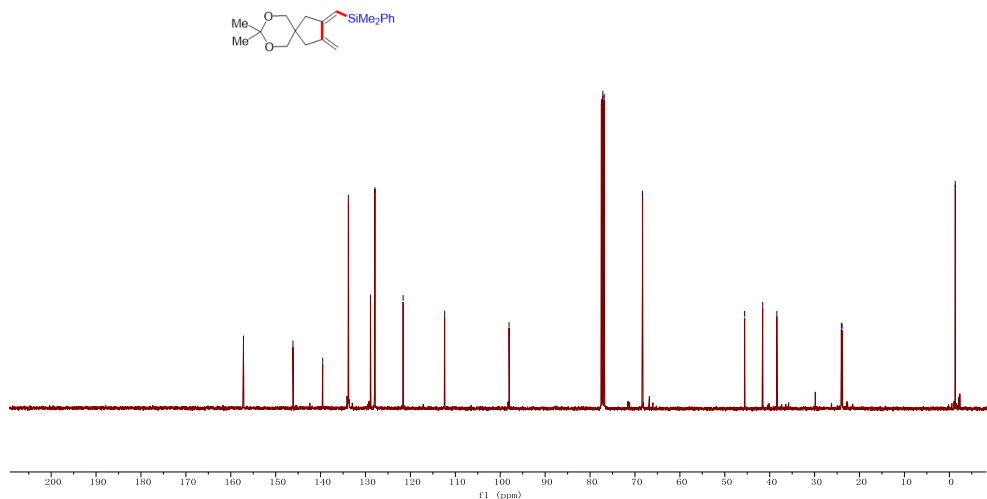

**dimethyl (Z)-3-((dimethyl(phenyl)silyl)methylene)-4-methylenecyclopentane-1,1-dicarboxylate (3aa)**

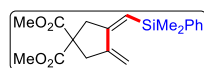

Prepared according to method **E** and the product **3aa** was obtained as colorless oil in 90% yield (61.8 mg).

**<sup>1</sup>H NMR** (400 MHz, CDCl<sub>3</sub>) δ 7.53 – 7.49 (m, 2H), 7.36 – 7.31 (m, 3H), 5.69 (s, 1H), 5.11 (s, 1H), 4.92 (s, 1H), 3.74 (s, 6H), 3.15 (s, 2H), 3.02 (s, 2H), 0.37 (s, 6H).

**<sup>13</sup>C NMR** (101 MHz, CDCl<sub>3</sub>) δ 171.9, 155.0, 144.6, 139.2, 133.9, 129.0, 127.9, 121.6, 112.2, 57.1, 53.0, 45.6, 42.2, -1.4.

**HRMS** (ESI): m/z Calcd. for C<sub>19</sub>H<sub>25</sub>O<sub>4</sub>Si [M+H]<sup>+</sup>: 345.1522, found: 345.1523.

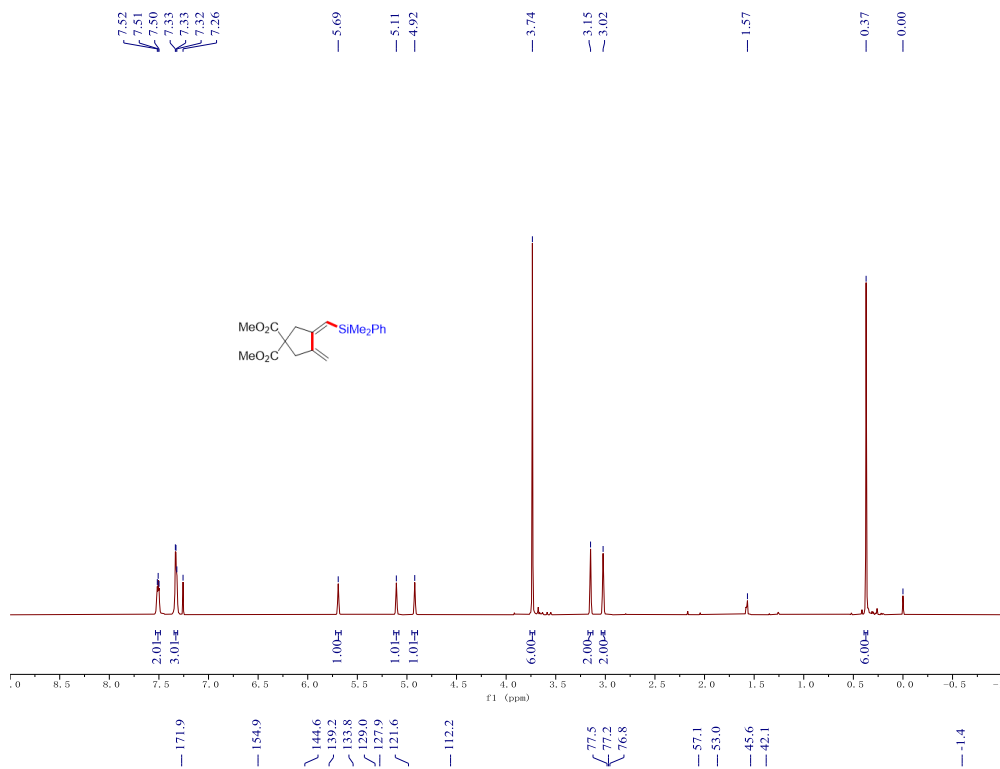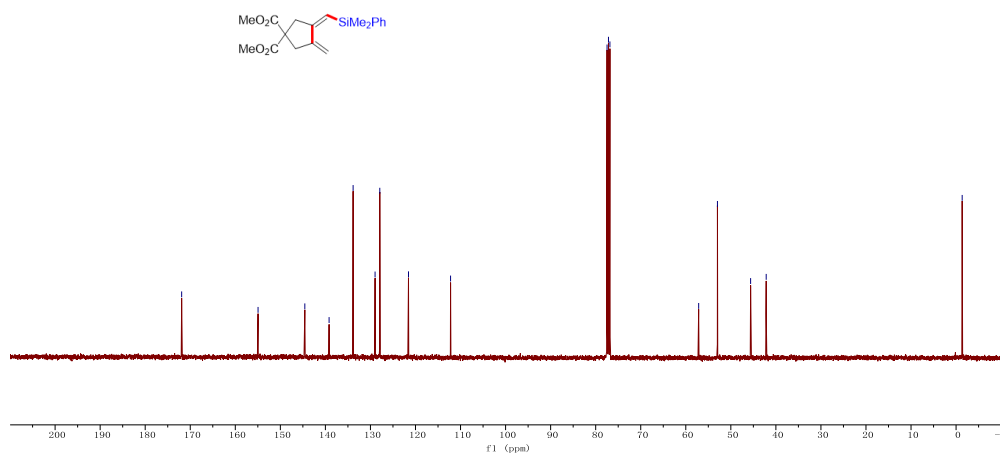

**(Z)-1-acetyl-3-((dimethyl(phenyl)silyl)methylene)-4-methylene-N-phenylcyclopentane-1-carboxamide (3ab)**

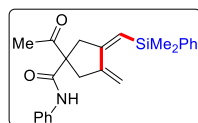

Prepared according to method E. The product **3ab** was obtained as white solid in 92% yield (71.4 mg).

**<sup>1</sup>H NMR** (400 MHz, CDCl<sub>3</sub>) δ 7.60 (s, 1H), 7.53 – 7.49 (m, 2H), 7.46 (d, *J* = 8.1 Hz, 2H), 7.36 – 7.29 (m, 5H), 7.12 (t, *J* = 7.3 Hz, 1H), 5.80 (s, 1H), 5.17 (s, 1H), 5.00 (s, 1H), 3.24 (d, *J* = 18.3 Hz, 1H), 3.19 (d, *J* = 17.4 Hz, 1H), 3.12 (d, *J* = 16.1 Hz, 1H), 3.05 (d, *J* = 15.8 Hz, 1H), 2.29 (s, 3H), 0.39 (s, 6H).

**<sup>13</sup>C NMR** (101 MHz, CDCl<sub>3</sub>) δ 207.8, 168.3, 154.7, 144.6, 138.9, 137.6, 133.8, 129.2, 129.1, 128.0, 124.8, 122.8, 120.0, 112.9, 65.0, 45.0, 41.3, 27.4, -1.4, -1.5.

**HRMS** (ESI): *m/z* Calcd. for C<sub>24</sub>H<sub>28</sub>NO<sub>2</sub>Si [M+H]<sup>+</sup>: 390.1889, found: 390.1891.

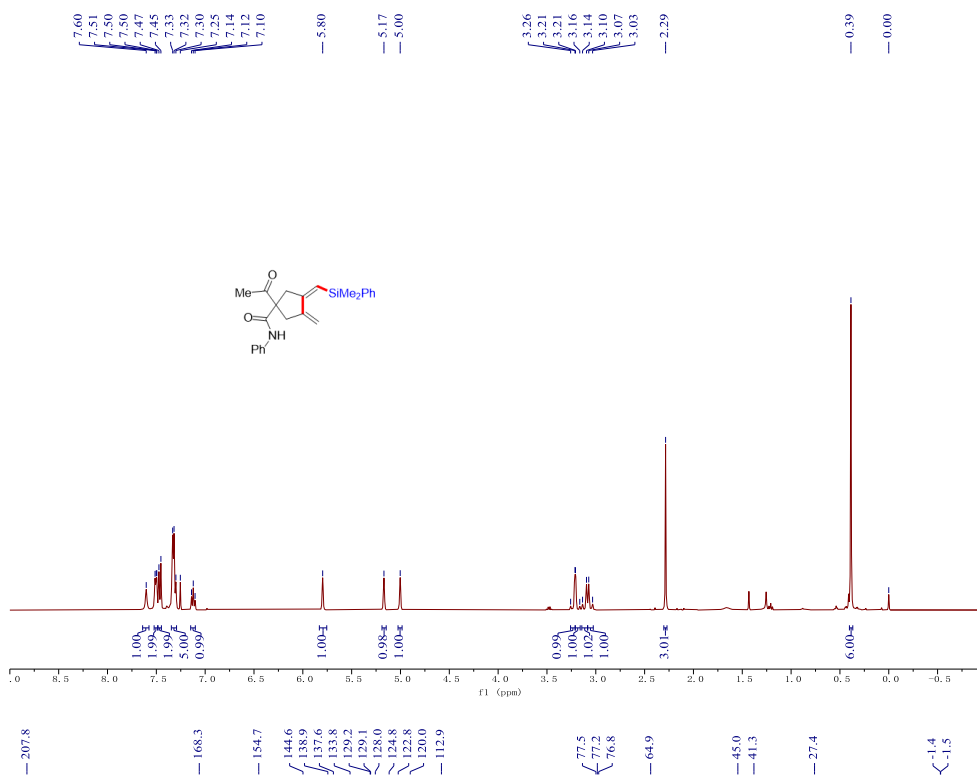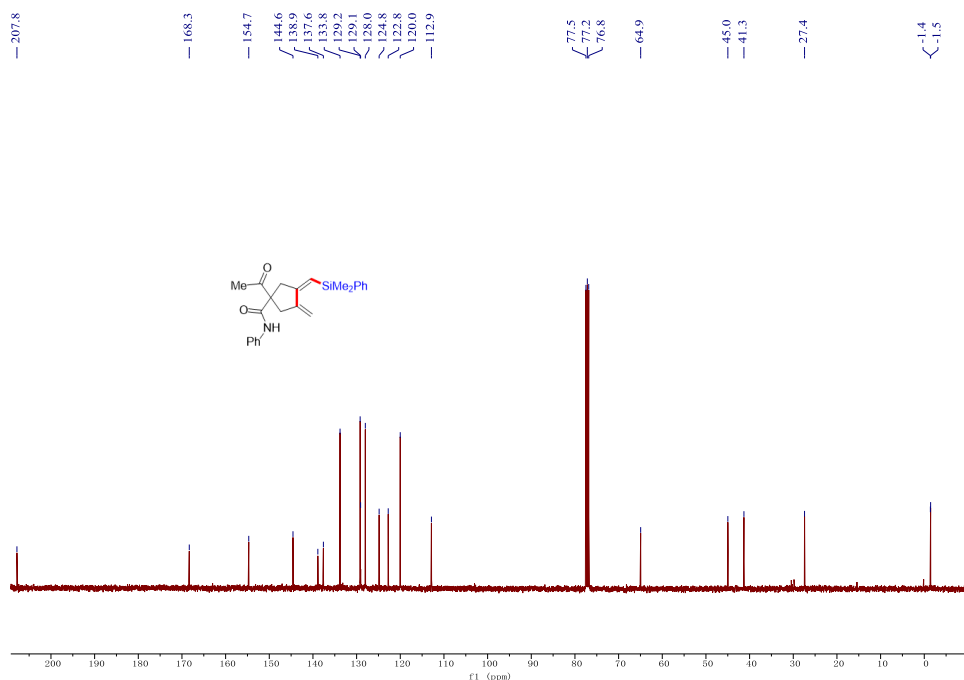

**methyl (Z)-3-((dimethyl(phenyl)silyl)methylene)-4-methylene-1-(phenylsulfonyl)cyclopentane-1-carboxylate (3ac)**

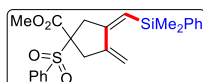

Prepared according to method E. The product **3ac** was obtained as colorless oil in 92% yield (78.4 mg).

$^1\text{H NMR}$  (400 MHz,  $\text{CDCl}_3$ )  $\delta$  7.83 (d,  $J = 8.0$  Hz, 2H), 7.68 (t,  $J = 7.3$  Hz, 1H), 7.55 (t,  $J = 7.6$  Hz, 2H), 7.51 – 7.46 (m, 2H), 7.35 – 7.30 (m, 3H), 5.71 (s, 1H), 5.09 (s, 1H), 4.91 (s, 1H), 3.67 (s, 3H), 3.43 (d,  $J = 16.6$  Hz, 1H), 3.28 (d,  $J = 15.9$  Hz, 1H), 3.22 (d,  $J = 16.7$  Hz, 1H), 3.09 (d,  $J = 16.1$  Hz, 1H), 0.36 (s, 3H), 0.35 (s, 3H).

$^{13}\text{C NMR}$  (101 MHz,  $\text{CDCl}_3$ )  $\delta$  168.3, 152.9, 143.0, 138.7, 136.6, 134.4, 133.8, 129.9, 129.1, 129.0, 128.0, 122.9, 113.0, 75.4, 53.5, 43.0, 39.8, -1.4, -1.6.

**HRMS** (ESI):  $m/z$  Calcd. for  $\text{C}_{23}\text{H}_{27}\text{SO}_4\text{Si}$   $[\text{M}+\text{H}]^+$ : 427.1399, found: 427.1395.

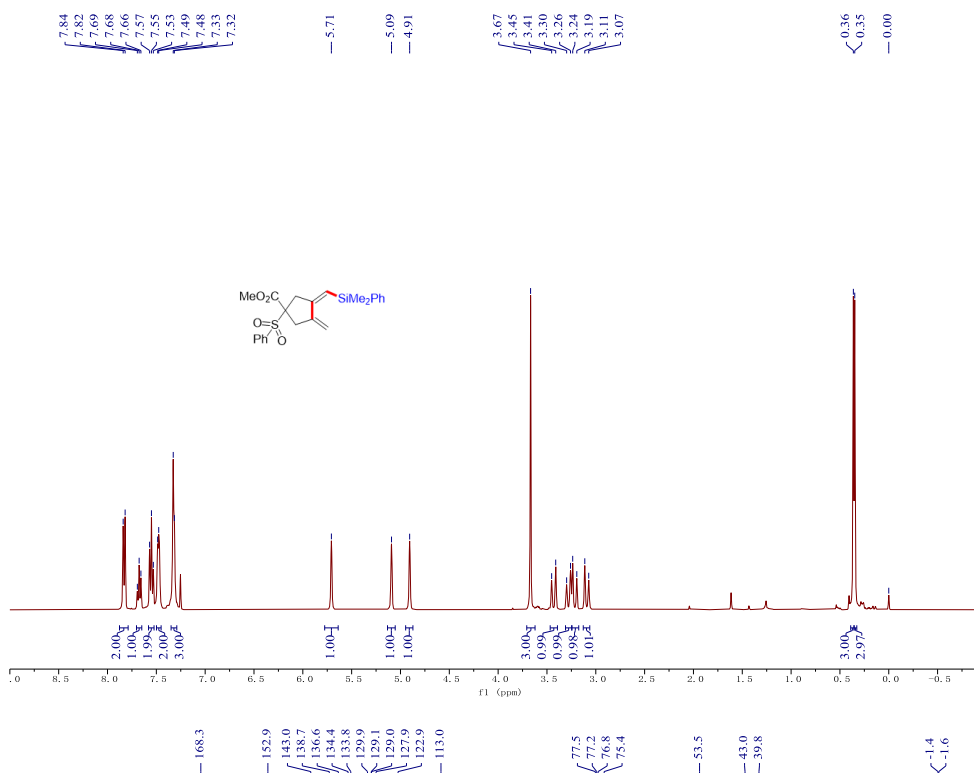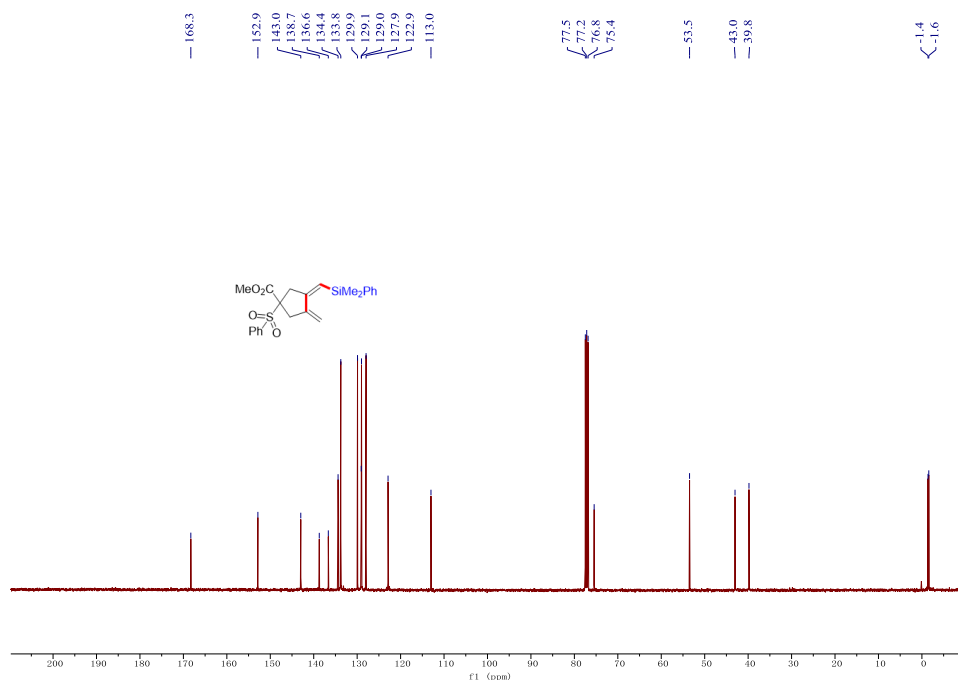

**ethyl (Z)-1-(diethoxyphosphoryl)-3-((dimethyl(phenyl)silyl)methylene)-4-methylenecyclopentane-1-carboxylate (3ad)**

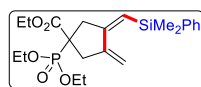

Prepared according to method E. The product **3ad** was obtained as colorless oil in 88% yield (76.9 mg).

$^1\text{H NMR}$  (400 MHz,  $\text{CDCl}_3$ )  $\delta$  7.55 – 7.47 (m, 2H), 7.35 – 7.29 (m, 3H), 5.69 (s, 1H), 5.09 (s, 1H), 4.92 (s, 1H), 4.25 – 4.09 (m, 6H), 3.30 – 2.94 (m, 4H), 1.32 (t,  $J = 7.0$  Hz, 6H), 1.26 (t,  $J = 7.0$  Hz, 3H), 0.37 (s, 3H), 0.36 (s, 3H).

$^{13}\text{C NMR}$  (101 MHz,  $\text{CDCl}_3$ )  $\delta$  171.0, 155.2 (d,  $J = 9.7$  Hz), 144.7 (d,  $J = 9.6$  Hz), 139.2, 133.8, 128.9, 127.9, 121.1, 111.9, 63.0 (d,  $J = 2.5$  Hz), 63.0 (d,  $J = 2.5$  Hz), 61.9, 51.6 (d,  $J = 141.2$  Hz), 43.9 (d,  $J = 2.4$  Hz), 40.4 (d,  $J = 2.4$  Hz), 16.6, 16.5, 14.2, -1.4, -1.5.

**HRMS** (ESI):  $m/z$  Calcd. for  $\text{C}_{22}\text{H}_{34}\text{O}_5\text{PSi}$   $[\text{M}+\text{H}]^+$ : 437.1913, found: 437.1912.

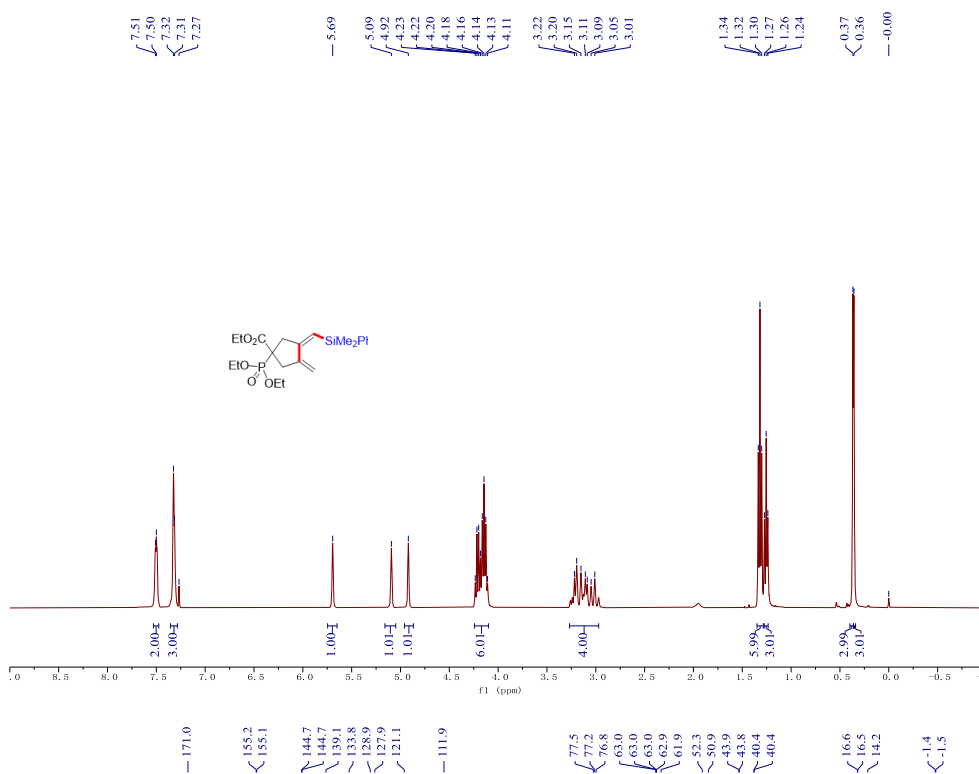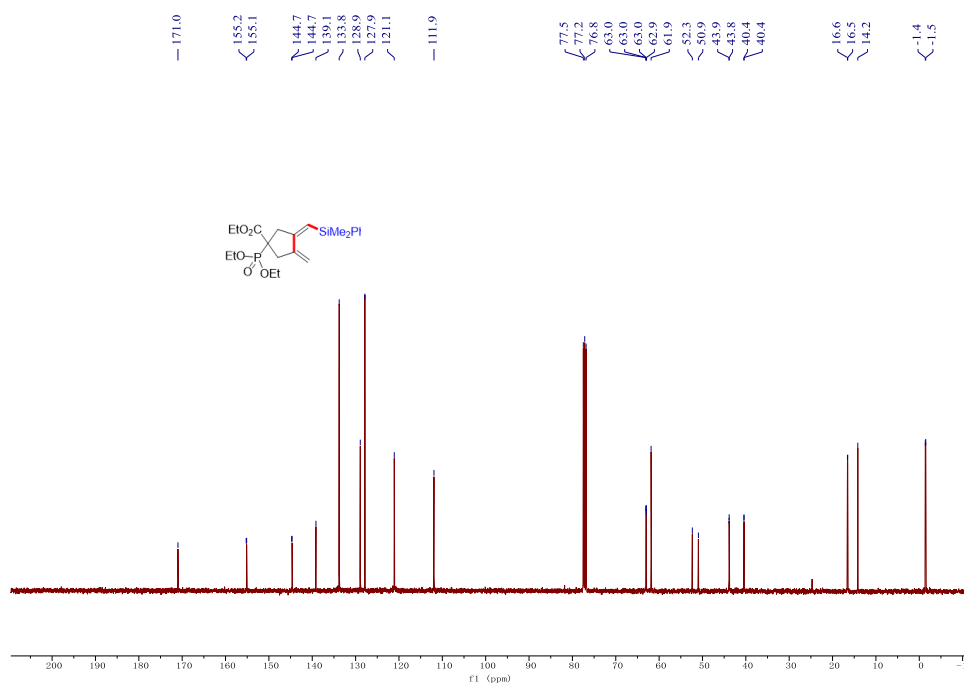

**ethyl (Z)-3-((dimethyl(phenyl)silyl)methylene)-4-methylene-1-phenylcyclopentane-1-carboxylate (3ae)**

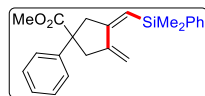

Prepared according to method E. The product **3ae** was obtained as colorless oil in 97% yield (73.3 mg).

**<sup>1</sup>H NMR** (400 MHz, CDCl<sub>3</sub>) δ 7.50 (d, *J* = 4.1 Hz, 2H), 7.37 – 7.28 (m, 7H), 7.27 – 7.22 (m, 1H), 5.75 (s, 1H), 5.12 (s, 1H), 4.96 (s, 1H), 4.08 (q, *J* = 7.0 Hz, 2H), 3.51 (d, *J* = 15.7 Hz, 1H), 3.40 (d, *J* = 15.4 Hz, 1H), 2.97 (d, *J* = 15.6 Hz, 1H), 2.83 (d, *J* = 15.2 Hz, 1H), 1.14 (t, *J* = 7.1 Hz, 3H), 0.37 (s, 6H).

**<sup>13</sup>C NMR** (101 MHz, CDCl<sub>3</sub>) δ 174.9, 156.4, 145.6, 142.3, 139.2, 133.9, 128.9, 128.5, 127.9, 127.1, 126.7, 121.0, 112.0, 61.2, 55.0, 48.8, 44.8, 14.2, -1.3, -1.4.

**HRMS** (ESI): *m/z* Calcd. for C<sub>24</sub>H<sub>29</sub>O<sub>2</sub>Si [M+H]<sup>+</sup>: 377.1937, found: 377.1942.

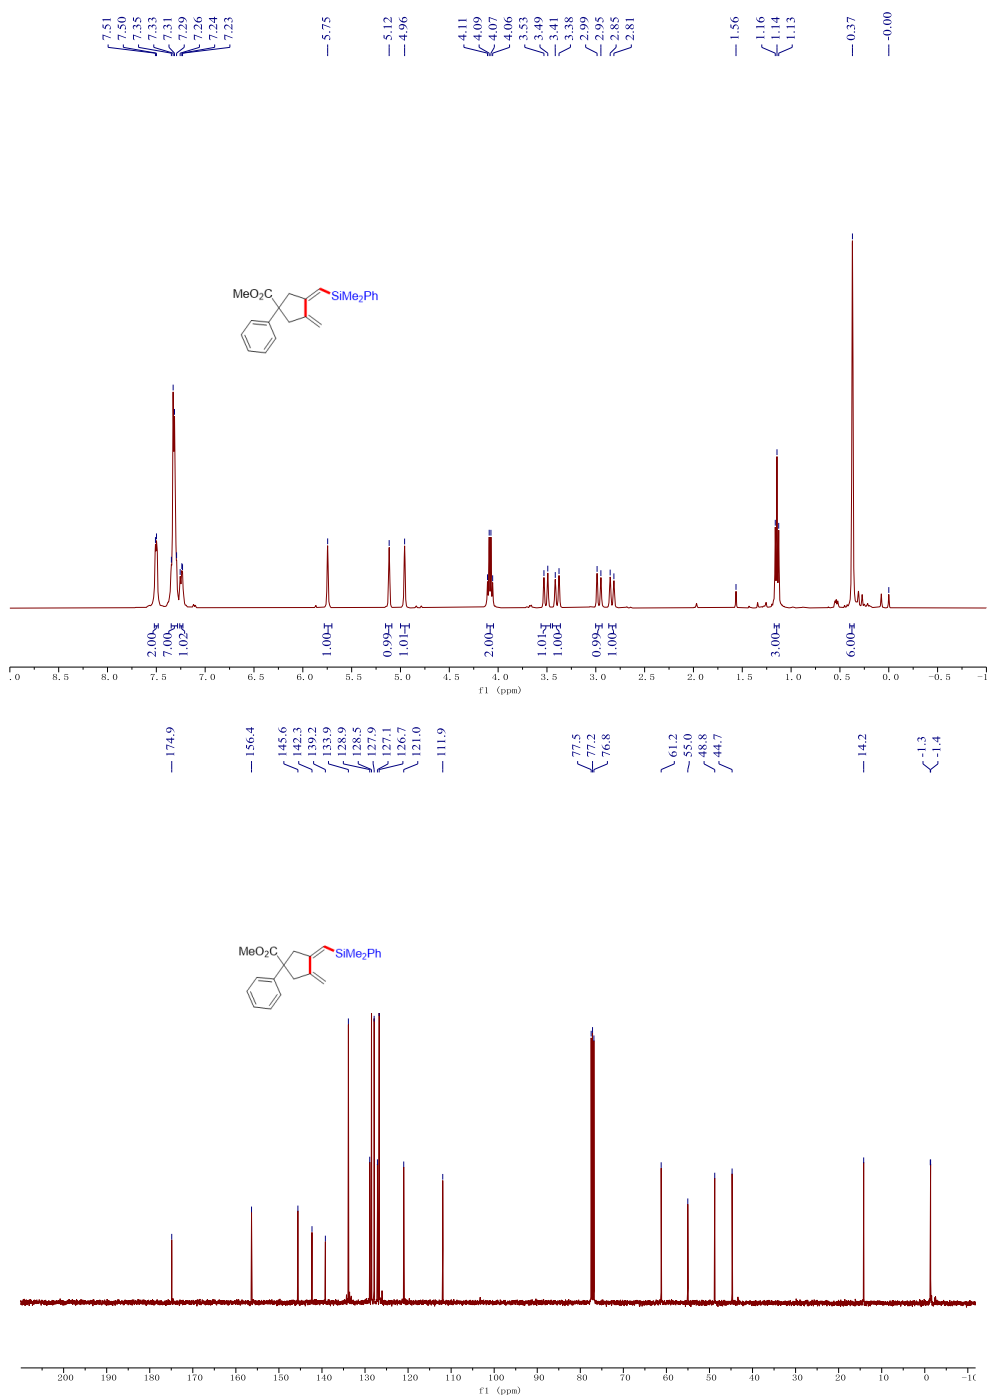

**methyl (Z)-3-((dimethyl(phenyl)silyl)methylene)-4-methylene-1-(p-tolyl)cyclopentane-1-carboxylate (3af)**

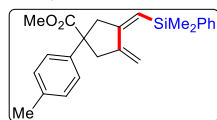

Prepared according to method E. The product **3af** was obtained as yellow oil in 95% yield (71.7 mg).

$^1\text{H NMR}$  (400 MHz,  $\text{CDCl}_3$ )  $\delta$  7.52 – 7.47 (m, 2H), 7.34 – 7.28 (m, 3H), 7.25 – 7.18 (m, 2H), 7.12 (d,  $J = 7.9$  Hz, 2H), 5.73 (s, 1H), 5.11 (s, 1H), 4.95 (s, 1H), 3.61 (s, 3H), 3.48 (d,  $J = 15.8$  Hz, 1H), 3.36 (d,  $J = 15.4$  Hz, 1H), 2.96 (d,  $J = 15.9$  Hz, 1H), 2.82 (d,  $J = 15.3$  Hz, 1H), 2.32 (s, 3H), 0.37 (s, 6H).

$^{13}\text{C NMR}$  (101 MHz,  $\text{CDCl}_3$ )  $\delta$  175.7, 156.3, 145.6, 139.3, 139.2, 136.8, 133.9, 129.3, 128.9, 127.9, 126.6, 121.0, 112.0, 54.7, 52.6, 48.8, 44.8, 21.1, -1.3, -1.3.

**HRMS** (ESI):  $m/z$  Calcd. for  $\text{C}_{24}\text{H}_{29}\text{O}_2\text{Si}$   $[\text{M}+\text{H}]^+$ : 377.1937, found: 377.1945.

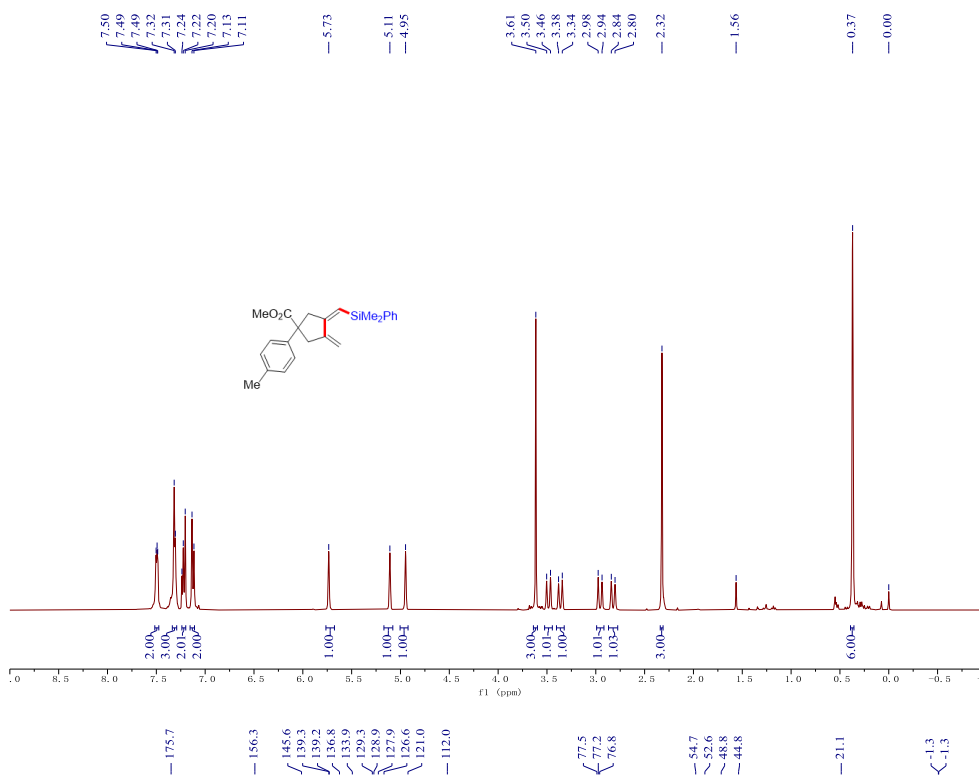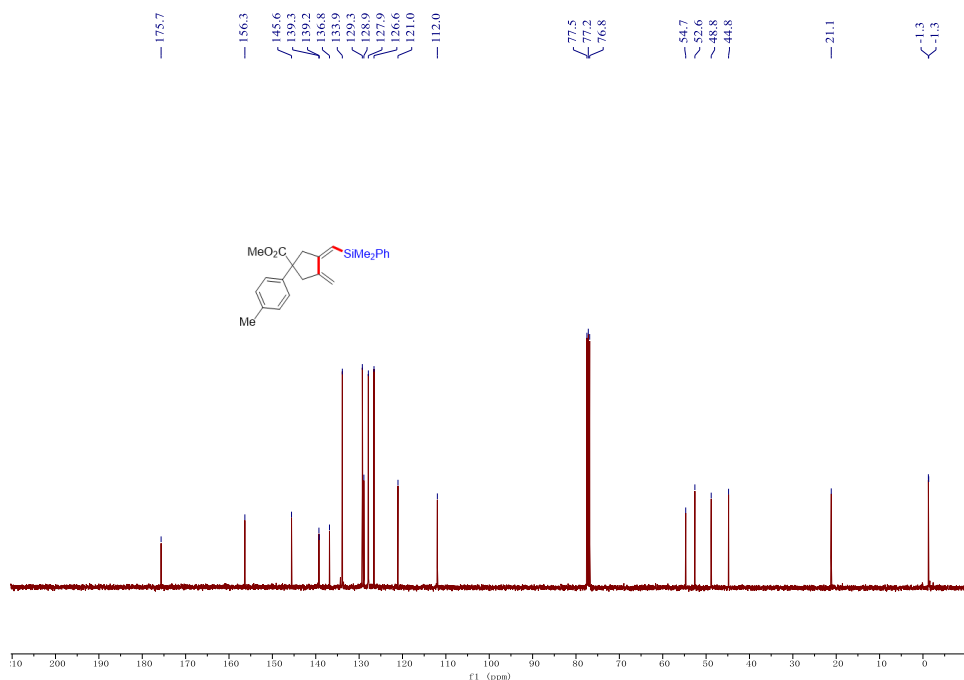



**methyl (Z)-3-((dimethyl(phenyl)silyl)methylene)-1-(4-methoxyphenyl)-4-methylenecyclopentane-1-carboxylate (3ag)**

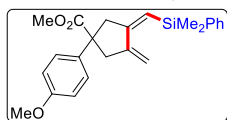

Prepared according to method E. The product **3ag** was obtained as yellow oil in 80% yield (62.4 mg).

$^1\text{H NMR}$  (400 MHz,  $\text{CDCl}_3$ )  $\delta$  7.52 – 7.46 (m, 2H), 7.34 – 7.29 (m, 3H), 7.25 (d,  $J = 8.1$  Hz, 2H), 6.85 (d,  $J = 8.4$  Hz, 2H), 5.73 (s, 1H), 5.11 (s, 1H), 4.95 (s, 1H), 3.79 (s, 3H), 3.62 (s, 3H), 3.48 (d,  $J = 15.7$  Hz, 1H), 3.35 (d,  $J = 15.4$  Hz, 1H), 2.94 (d,  $J = 15.7$  Hz, 1H), 2.81 (d,  $J = 15.1$  Hz, 1H), 0.37 (s, 6H).

$^{13}\text{C NMR}$  (101 MHz,  $\text{CDCl}_3$ )  $\delta$  175.7, 158.7, 156.3, 145.6, 139.2, 134.3, 133.9, 128.9, 127.9, 127.8, 121.1, 113.9, 112.0, 55.4, 54.3, 52.6, 48.9, 44.9, -1.3, -1.3.

**HRMS** (ESI):  $m/z$  Calcd. for  $\text{C}_{24}\text{H}_{29}\text{O}_3\text{Si}$   $[\text{M}+\text{H}]^+$ : 393.1886, found: 393.1884.

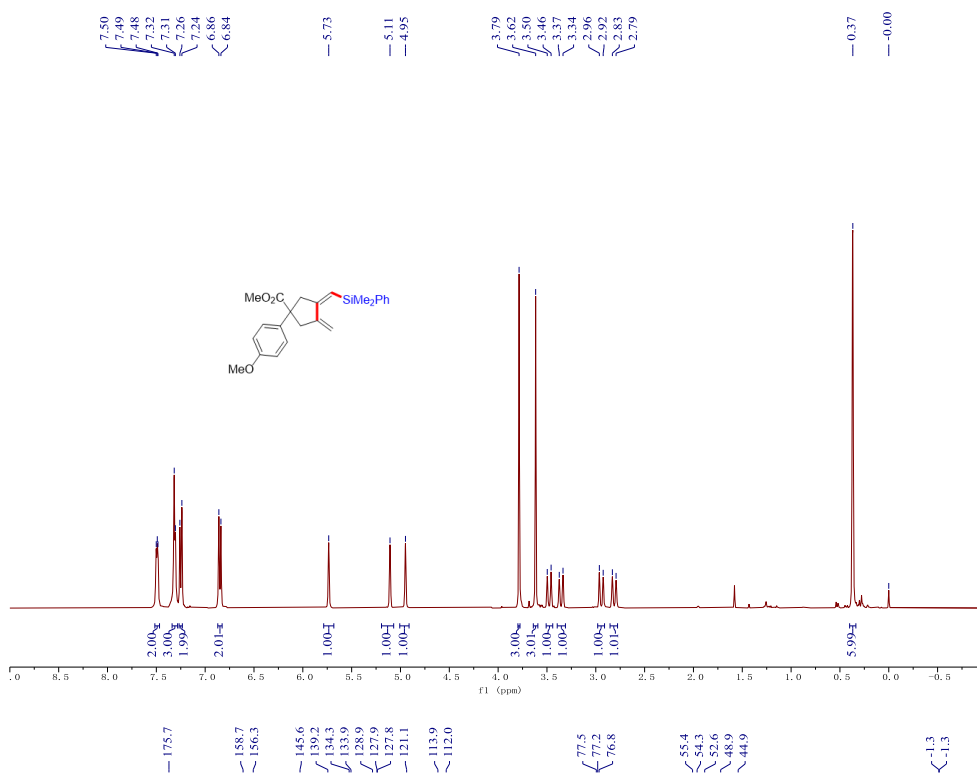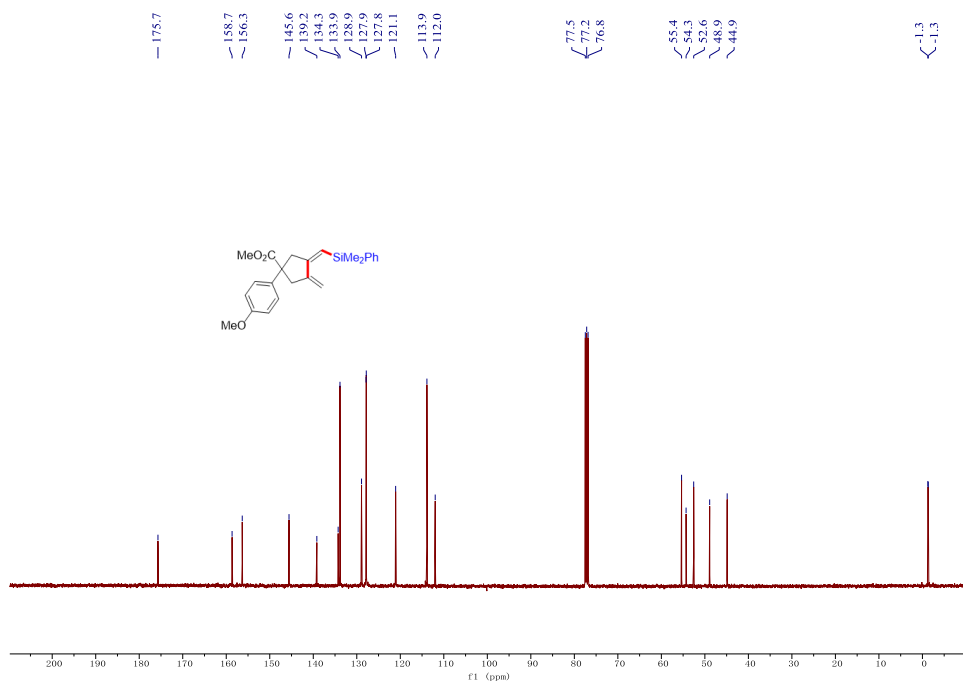

**(Z)-3-((dimethyl(phenyl)silyl)methylene)-4-methylene-1-phenylcyclopentane-1-carbonitrile (3ah)**

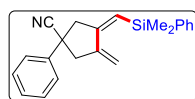

Prepared according to method E. The product **3ah** was obtained as yellow oil in 85% yield (55.9 mg).

$^1\text{H NMR}$  (400 MHz,  $\text{CDCl}_3$ )  $\delta$  7.57 – 7.52 (m, 2H), 7.45 (d,  $J = 7.6$  Hz, 2H), 7.42 – 7.32 (m, 6H), 5.84 (s, 1H), 5.26 (s, 1H), 5.04 (s, 1H), 3.33 (d,  $J = 15.9$  Hz, 1H), 3.22 (d,  $J = 15.7$  Hz, 1H), 3.12 (d,  $J = 15.8$  Hz, 1H), 3.00 (d,  $J = 15.5$  Hz, 1H), 0.42 (s, 3H), 0.41 (s, 3H).

$^{13}\text{C NMR}$  (101 MHz,  $\text{CDCl}_3$ )  $\delta$  153.5, 143.5, 139.0, 138.6, 133.9, 129.2, 129.1, 128.3, 128.1, 126.1, 123.7, 113.7, 51.6, 47.8, 44.2, -1.4, -1.5.

**HRMS** (ESI):  $m/z$  Calcd. for  $\text{C}_{22}\text{H}_{24}\text{NSi}$   $[\text{M}+\text{H}]^+$ : 330.1678, found: 330.1679.

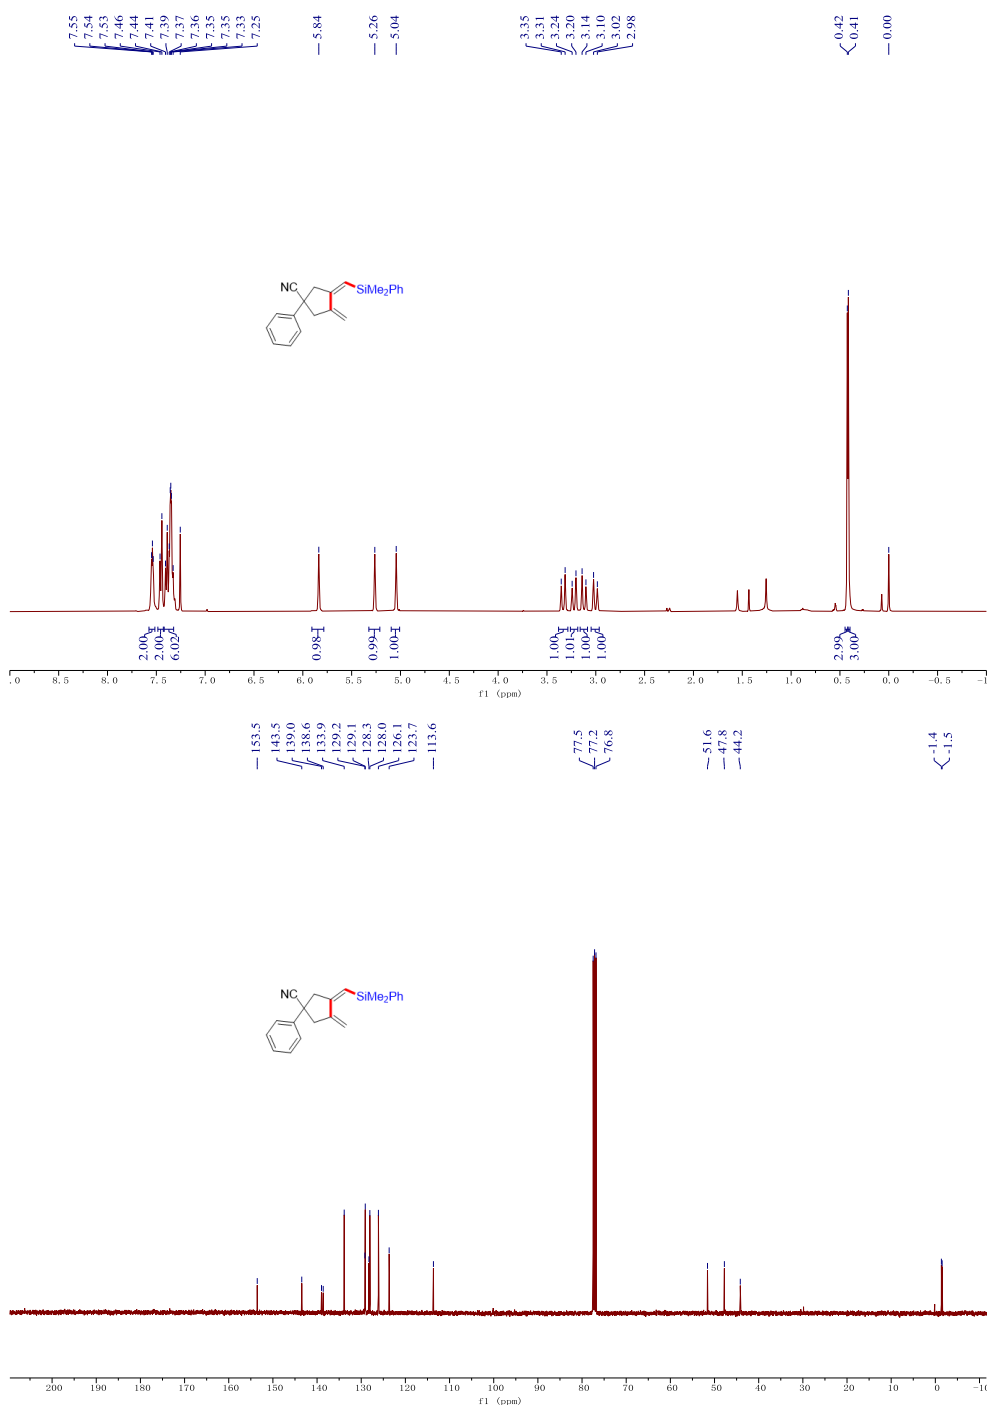

**(E)-1-benzyl-3-((dimethyl(phenyl)silyl)methylene)-4-methylenepyrrolidine (3ai)**

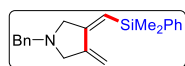

Prepared according to method **E**. The product **3ai** was obtained as colorless oil in 93% yield (59.2 mg).

**<sup>1</sup>H NMR** (400 MHz, CDCl<sub>3</sub>) δ 7.57 – 7.50 (m, 2H), 7.38 – 7.26 (m, 8H), 5.66 (s, 1H), 5.11 (s, 1H), 4.90 (s, 1H), 3.63 (s, 2H), 3.41 (s, 2H), 3.31 (s, 2H), 0.38 (s, 6H).

**<sup>13</sup>C NMR** (101 MHz, CDCl<sub>3</sub>) δ 154.7, 144.5, 138.9, 138.5, 133.9, 129.1, 129.0, 128.5, 128.0, 127.3, 119.1, 110.2, 64.5, 61.3, 60.8, -1.6.

**HRMS** (ESI): m/z Calcd. for C<sub>21</sub>H<sub>26</sub>NSi [M+H]<sup>+</sup>: 320.1835, found: 320.1836.

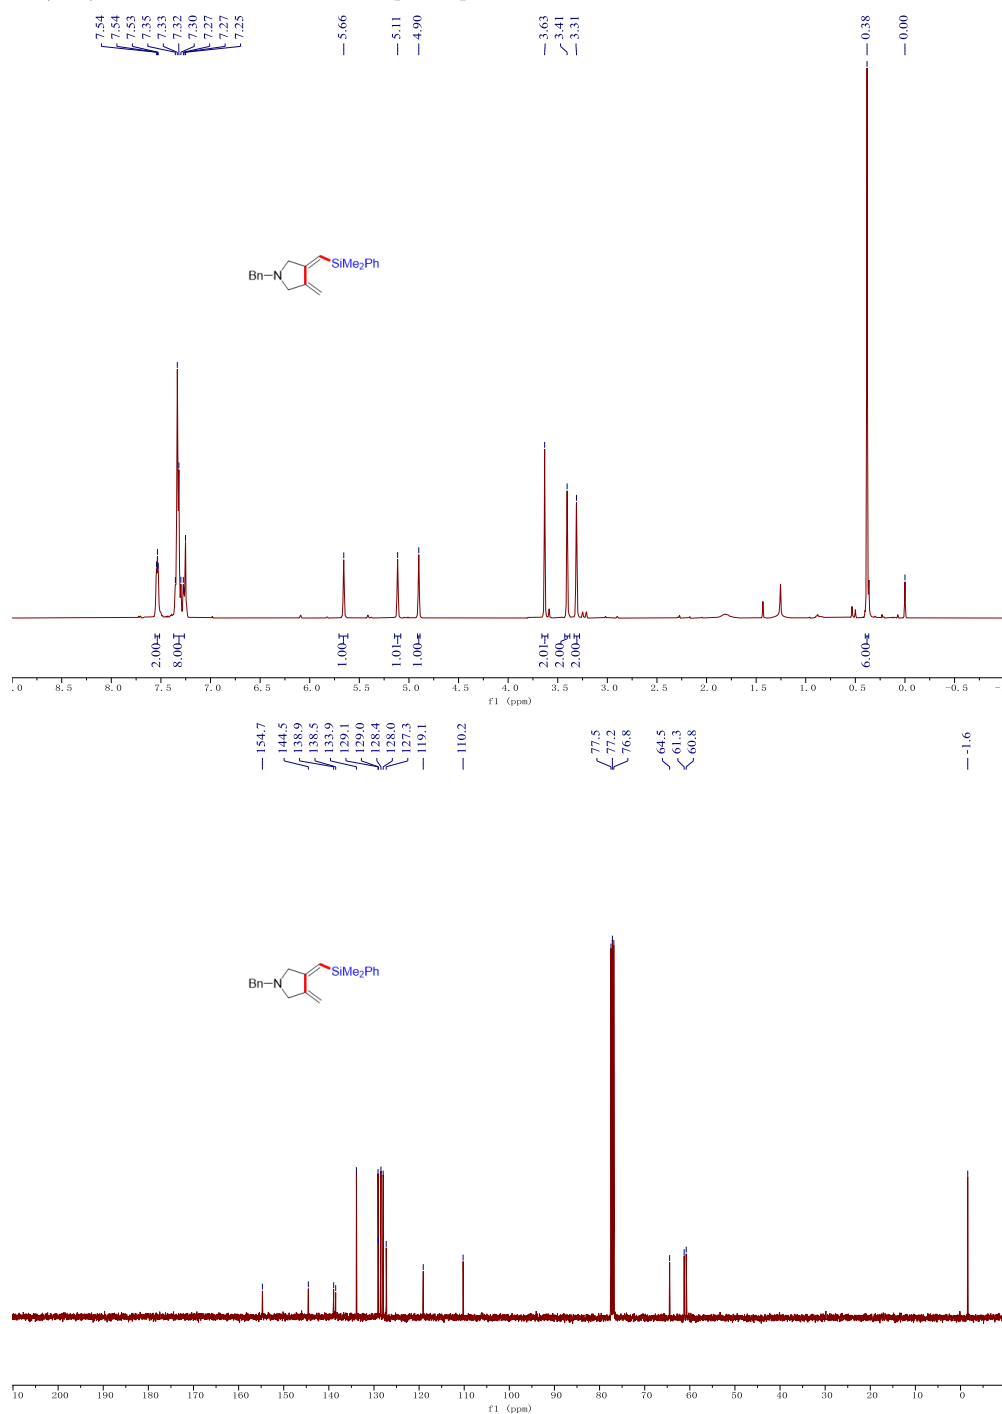

**(E)-3-((dimethyl(phenyl)silyl)methylene)-4-methylene-1-tosylpyrrolidine (3aj)**

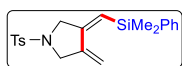

Prepared according to method **E**. The product **3aj** was obtained as colorless oil in 72% yield (55.2 mg).

**<sup>1</sup>H NMR** (400 MHz, CDCl<sub>3</sub>) δ 7.71 (d, *J* = 8.0 Hz, 2H), 7.50 – 7.42 (m, 2H), 7.37 – 7.28 (m, 5H), 5.69 (s, 1H), 5.11 (s, 1H), 4.91 (s, 1H), 4.01 (s, 2H), 3.94 (s, 2H), 2.43 (s, 3H), 0.34 (s, 6H).

**<sup>13</sup>C NMR** (101 MHz, CDCl<sub>3</sub>) δ 150.5, 143.9, 141.1, 138.1, 133.7, 132.7, 129.8, 129.3, 128.1, 128.1, 122.1, 112.1, 56.7, 54.1, 21.7, -1.8.

**HRMS** (ESI): *m/z* Calcd. for C<sub>21</sub>H<sub>26</sub>NO<sub>2</sub>SSi [M+H]<sup>+</sup>: 384.1454, found: 384.1458.

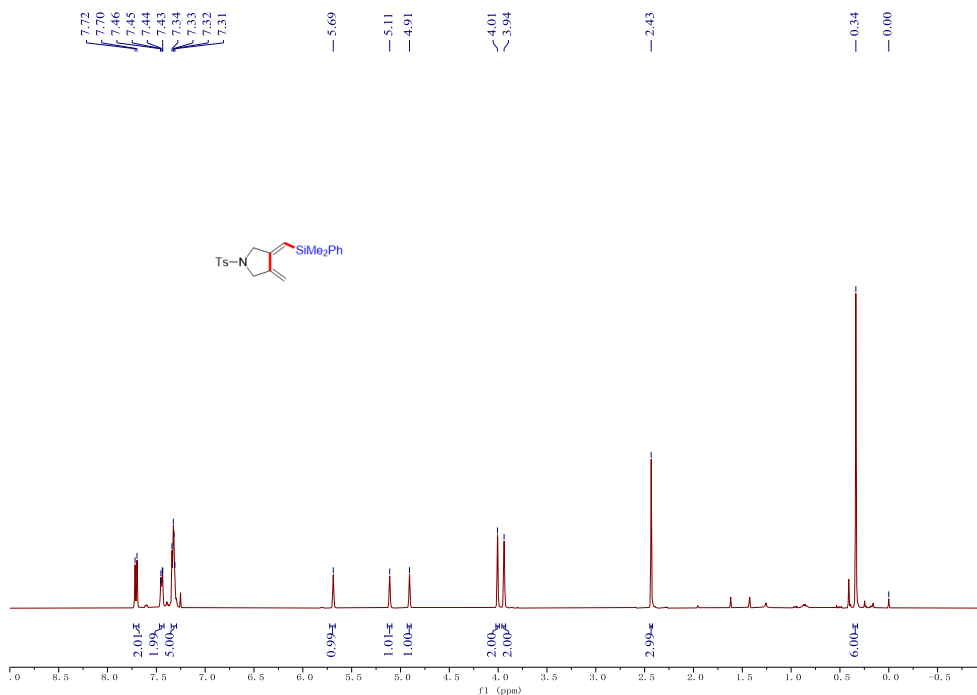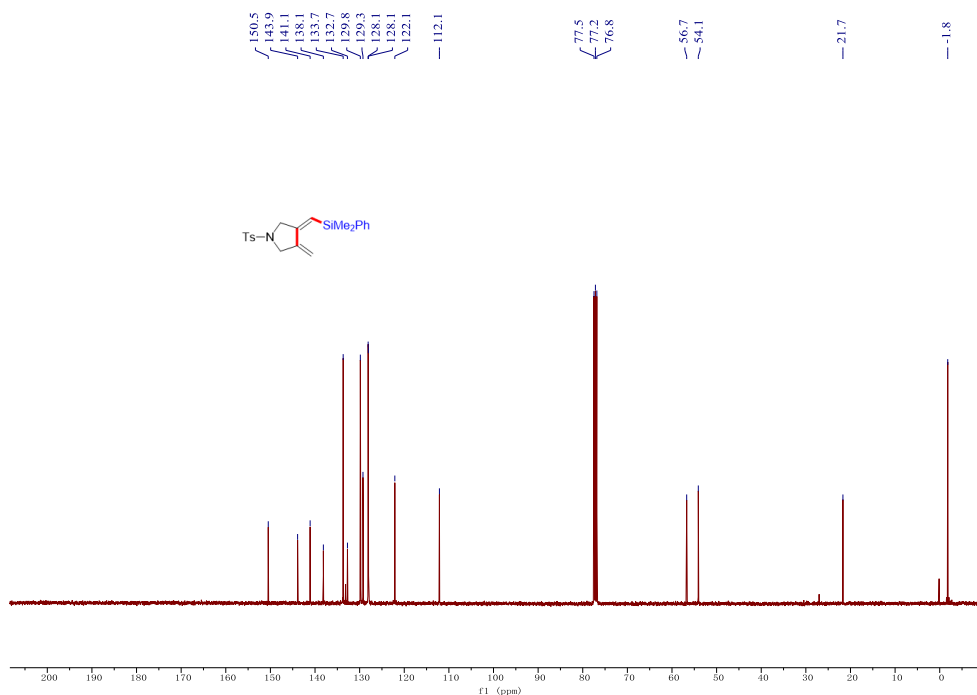

**(*S,Z*)-1'-benzyl-3-((dimethyl(phenyl)silyl)methylene)-4-methylenespiro[cyclopentane-1,3'-indolin]-2'-one (**4a**)**

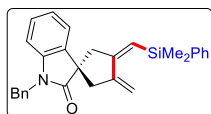

Prepared according to method F. The product **4a** was isolated in 74% yield (64.5 mg) with 92% ee.

The characterization data and spectrums of **4a** are same to **3a**

$[\alpha]_D^{20} +7.9^\circ$  (*c* 1.35, CHCl<sub>3</sub>)

The enantiomeric excess of **4a** was determined by chiral HPLC analysis on IC-3 column.

Conditions: hexane/isopropanol = 95:5, flow rate = 0.5 mL/min, T = 25 °C, UV-Vis detection at  $\lambda = 254$  nm,  $t_{R1} = 28.3$  min (minor),  $t_{R2} = 32.2$  min (major).

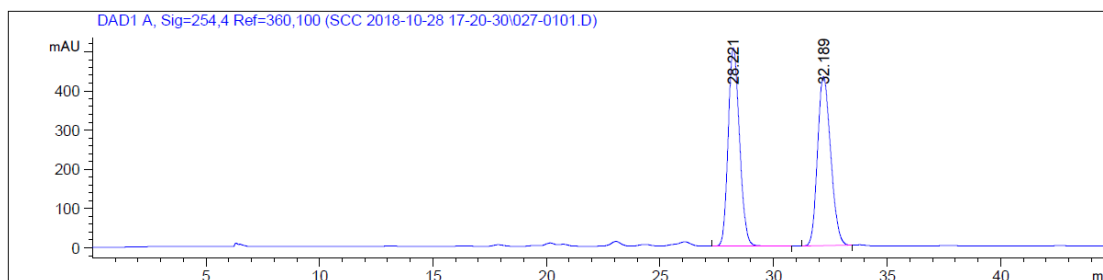

Signal 1: DAD1 A, Sig=254,4 Ref=360,100

| Peak # | RetTime [min] | Type | Width [min] | Area [mAU*s] | Height [mAU] | Area %  |
|--------|---------------|------|-------------|--------------|--------------|---------|
| 1      | 28.221        | BB   | 0.5405      | 1.75231e4    | 505.45673    | 50.2562 |
| 2      | 32.189        | BB   | 0.6272      | 1.73445e4    | 431.28418    | 49.7438 |

Totals : 3.48676e4 936.74091

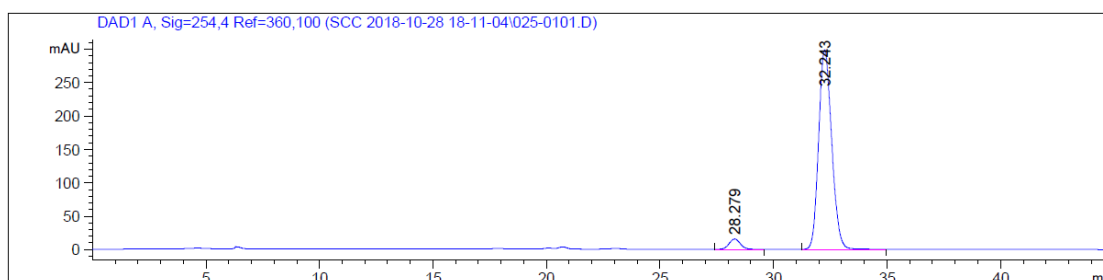

Signal 1: DAD1 A, Sig=254,4 Ref=360,100

| Peak # | RetTime [min] | Type | Width [min] | Area [mAU*s] | Height [mAU] | Area %  |
|--------|---------------|------|-------------|--------------|--------------|---------|
| 1      | 28.279        | BB   | 0.5288      | 523.55487    | 15.54896     | 4.2113  |
| 2      | 32.243        | BB   | 0.6213      | 1.19086e4    | 298.59094    | 95.7887 |

Totals : 1.24322e4 314.13990

**(*S,Z*)-1'-benzyl-3-((dimethyl(phenyl)silyl)methylene)-5'-methyl-4-methylenespiro[cyclopentane-1,3'-indolin]-2'-one (**4b**)**

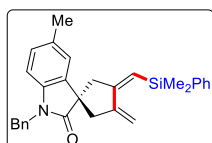

Prepared according to method **F**. The product **4b** was isolated in 80% yield (71.9 mg) and 94% ee.

The characterization data and spectrums of **4b** are same to **3b**.

$[\alpha]_D^{20} +12.6^\circ$  (*c* 1.14, CHCl<sub>3</sub>)

The enantiomeric excess of **4b** was determined by chiral HPLC analysis on IC-3 column.

Conditions: hexane/isopropanol = 90:10, flow rate = 0.4 mL/min, T = 25 °C, UV-Vis detection at  $\lambda = 260$  nm,  $t_{R1} = 28.1$  min (minor),  $t_{R2} = 32.4$  min (major).

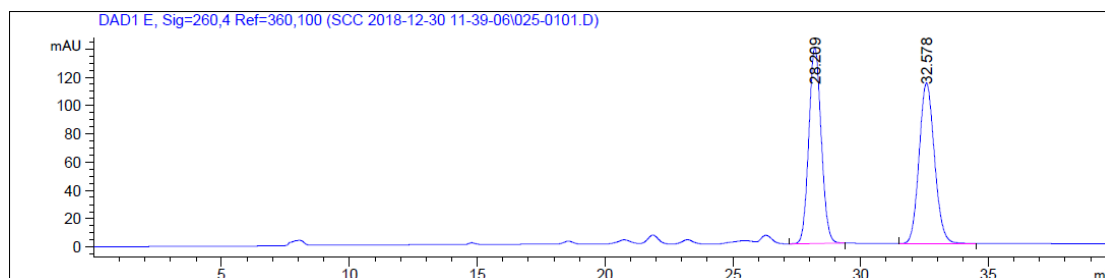

Signal 5: DAD1 E, Sig=260,4 Ref=360,100

| Peak # | RetTime [min] | Type | Width [min] | Area [mAU*s] | Height [mAU] | Area %  |
|--------|---------------|------|-------------|--------------|--------------|---------|
| 1      | 28.209        | BB   | 0.5252      | 4672.03516   | 138.63710    | 49.6211 |
| 2      | 32.578        | BB   | 0.6475      | 4743.39258   | 113.52082    | 50.3789 |

Totals : 9415.42773 252.15792

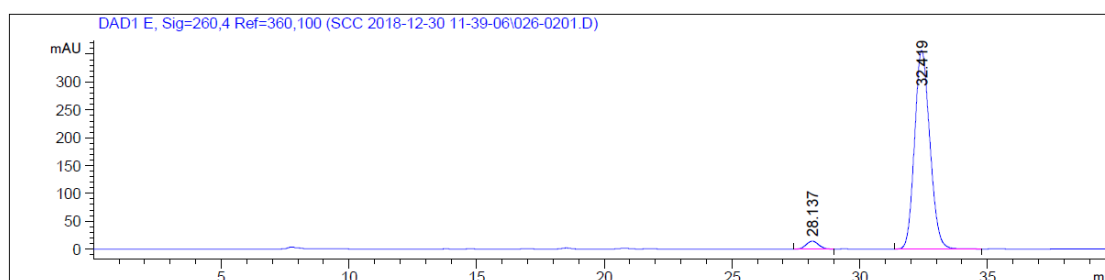

Signal 5: DAD1 E, Sig=260,4 Ref=360,100

| Peak # | RetTime [min] | Type | Width [min] | Area [mAU*s] | Height [mAU] | Area %  |
|--------|---------------|------|-------------|--------------|--------------|---------|
| 1      | 28.137        | BB   | 0.5125      | 471.56274    | 14.16234     | 3.0847  |
| 2      | 32.419        | BB   | 0.6445      | 1.48155e4    | 356.72794    | 96.9153 |

Totals : 1.52871e4 370.89027

**(*S,Z*)-1'-benzyl-3-((dimethyl(phenyl)silyl)methylene)-5',7'-dimethyl-4-methylenespiro[cyclopentane-1,3'-indolin]-2'-one (**4c**)**

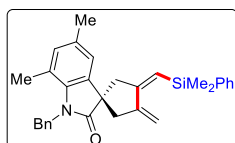

Prepared according to method F. The product **4c** was isolated in 72% yield (66.4 mg) and 96% ee.

The characterization data and spectrums of **4c** are same to **3c**.

$[\alpha]_D^{20} +8.7^\circ$  (*c* 2.30, CHCl<sub>3</sub>)

The enantiomeric excess of **4c** was determined by chiral HPLC analysis on Chiralpak IC-3 column. Conditions: hexane/isopropanol = 92:8, flow rate = 0.5 mL/min, T = 25 °C, UV-Vis detection at λ = 254 nm, *t*<sub>R1</sub> = 34.0 min (minor), *t*<sub>R2</sub> = 36.1 min (major).

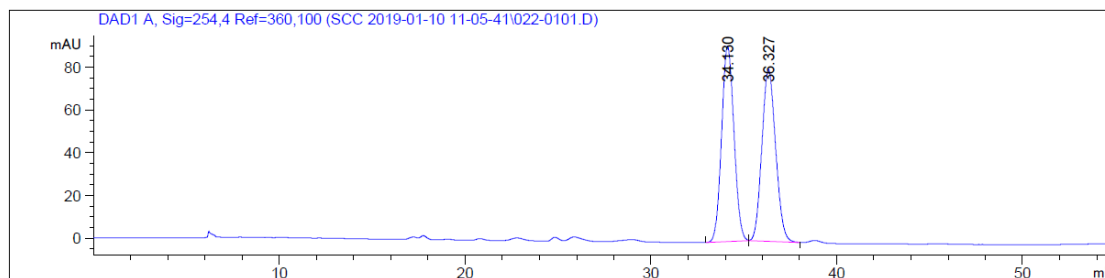

Signal 1: DAD1 A, Sig=254,4 Ref=360,100

| Peak # | RetTime [min] | Type | Width [min] | Area [mAU*s] | Height [mAU] | Area %  |
|--------|---------------|------|-------------|--------------|--------------|---------|
| 1      | 34.130        | BB   | 0.7170      | 4220.34033   | 91.34421     | 50.5122 |
| 2      | 36.327        | BB   | 0.8073      | 4134.75879   | 80.22382     | 49.4878 |

Totals : 8355.09912 171.56802

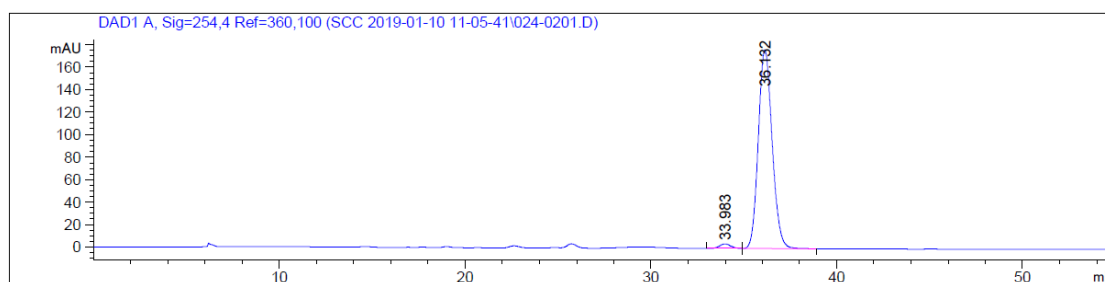

Signal 1: DAD1 A, Sig=254,4 Ref=360,100

| Peak # | RetTime [min] | Type | Width [min] | Area [mAU*s] | Height [mAU] | Area %  |
|--------|---------------|------|-------------|--------------|--------------|---------|
| 1      | 33.983        | BB   | 0.6166      | 176.31381    | 3.95137      | 1.8932  |
| 2      | 36.132        | BB   | 0.8031      | 9136.66113   | 176.75449    | 98.1068 |

Totals : 9312.97495 180.70585

**(*S,Z*)-1'-benzyl-3-((dimethyl(phenyl)silyl)methylene)-5'-fluoro-4-methylenespiro[cyclopentane-1,3'-indolin]-2'-one (**4d**)**

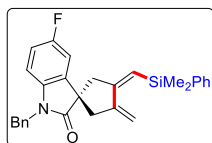

Prepared according to method F. The product **4d** was isolated in 67% yield (60.4 mg) with 91% ee.

The characterization data and spectrums of **4d** are same to **3d**.

$[\alpha]_D^{20} +27.3^\circ$  (*c* 3.20, CHCl<sub>3</sub>)

The enantiomeric excess of **4d** was determined by chiral HPLC analysis on IC-3 column.

Conditions: hexane/isopropanol = 95:5, flow rate = 0.4 mL/min, T = 25 °C, UV-Vis detection at  $\lambda = 260$  nm,  $t_{R1} = 30.1$  min (minor),  $t_{R2} = 34.0$  min (major).

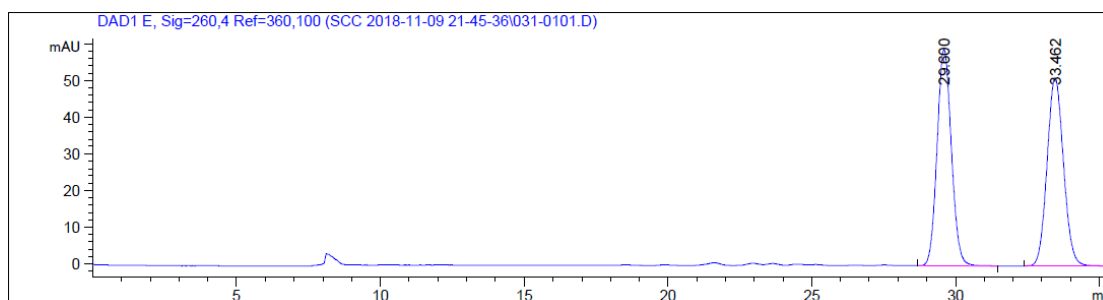

Signal 5: DAD1 E, Sig=260,4 Ref=360,100

| Peak # | RetTime [min] | Type | Width [min] | Area [mAU*s] | Height [mAU] | Area %  |
|--------|---------------|------|-------------|--------------|--------------|---------|
| 1      | 29.600        | BB   | 0.5357      | 2044.32739   | 59.07508     | 50.0249 |
| 2      | 33.462        | BBA  | 0.6223      | 2042.29297   | 51.31702     | 49.9751 |

Totals : 4086.62036 110.39211

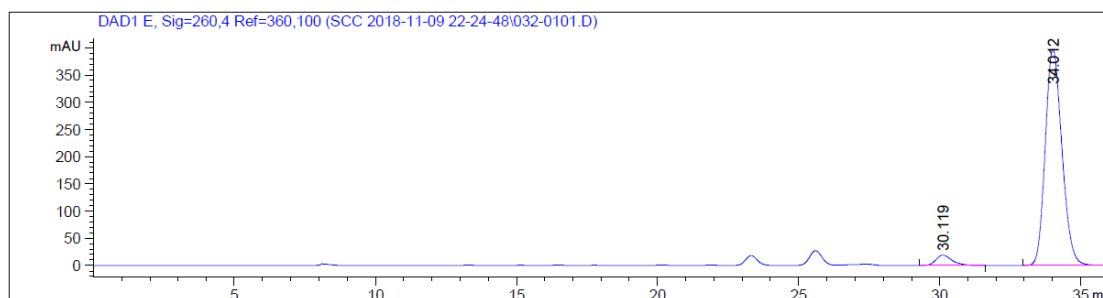

Signal 5: DAD1 E, Sig=260,4 Ref=360,100

| Peak # | RetTime [min] | Type | Width [min] | Area [mAU*s] | Height [mAU] | Area %  |
|--------|---------------|------|-------------|--------------|--------------|---------|
| 1      | 30.119        | BB   | 0.6049      | 767.74963    | 19.10295     | 4.4870  |
| 2      | 34.012        | BBA  | 0.6372      | 1.63429e4    | 397.92712    | 95.5130 |



**(*S,Z*)-1'-benzyl-5'-chloro-3-((dimethyl(phenyl)silyl)methylene)-4-methylenespiro[cyclopentane-1,3'-indolin]-2'-one (**4e**)**

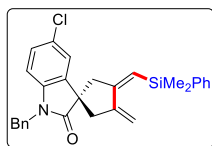

Prepared according to method F. The product **4e** was isolated in 56% yield (52.4 mg) and 92% ee.

The characterization data and spectra of **4e** are same to **3e**.

$[\alpha]_D^{20} +28.9^\circ$  (*c* 1.01, CHCl<sub>3</sub>)

The enantiomeric excess of **4e** was determined by chiral HPLC analysis on IC-3 column.

Conditions: hexane/isopropanol = 94:6, flow rate = 0.5 mL/min, T = 25 °C, UV-Vis detection at λ = 254 nm, *t*<sub>R1</sub> = 18.6 min (minor), *t*<sub>R2</sub> = 21.7 min (major).

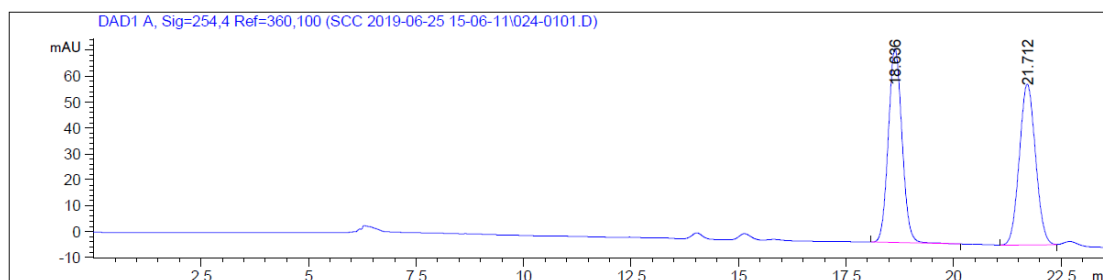

Signal 1: DAD1 A, Sig=254,4 Ref=360,100

| Peak # | RetTime [min] | Type | Width [min] | Area [mAU*s] | Height [mAU] | Area %  |
|--------|---------------|------|-------------|--------------|--------------|---------|
| 1      | 18.636        | BB   | 0.3449      | 1661.94470   | 74.88974     | 50.5844 |
| 2      | 21.712        | BB   | 0.4072      | 1623.54663   | 62.05556     | 49.4156 |

Totals : 3285.49133 136.94530

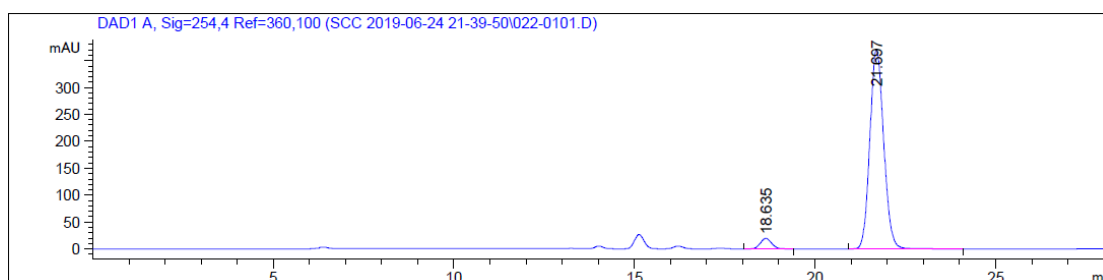

Signal 1: DAD1 A, Sig=254,4 Ref=360,100

| Peak # | RetTime [min] | Type | Width [min] | Area [mAU*s] | Height [mAU] | Area %  |
|--------|---------------|------|-------------|--------------|--------------|---------|
| 1      | 18.635        | BB   | 0.3444      | 430.87222    | 19.60421     | 4.1824  |
| 2      | 21.697        | BB   | 0.4131      | 9871.22949   | 370.15411    | 95.8176 |

Totals : 1.03021e4 389.75833

**(*S,Z*)-1'-benzyl-5'-bromo-3-((dimethyl(phenyl)silyl)methylene)-4-methylenespiro[cyclopentane-1,3'-indolin]-2'-one (**4f**)**

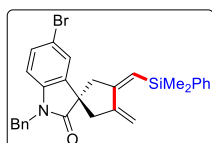

Prepared according to method F. The product **4f** was isolated in 72% yield (73.7 mg) and 91% ee.

The characterization data and spectrums of **4f** are same to **3f**.

$[\alpha]_D^{20} +32.9^\circ$  (*c* 2.03, CHCl<sub>3</sub>)

The enantiomeric excess of **4f** was determined by chiral HPLC analysis on IC-3 column.

Conditions: hexane/isopropanol = 94:6, flow rate = 0.5 mL/min, T = 25 °C, UV-Vis detection at  $\lambda = 254$  nm,  $t_{R1} = 19.6$  min (minor),  $t_{R2} = 23.4$  min (major).

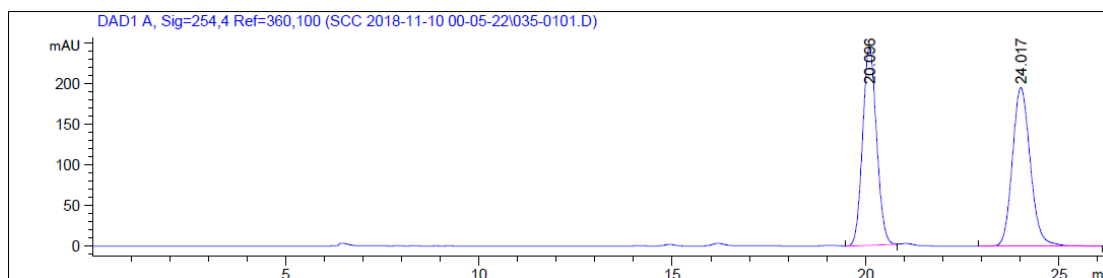

Signal 1: DAD1 A, Sig=254,4 Ref=360,100

| Peak # | RetTime [min] | Type | Width [min] | Area [mAU*s] | Height [mAU] | Area %  |
|--------|---------------|------|-------------|--------------|--------------|---------|
| 1      | 20.096        | BB   | 0.3906      | 6106.10498   | 243.43355    | 49.2254 |
| 2      | 24.017        | BB   | 0.4984      | 6298.26660   | 195.21004    | 50.7746 |

Totals : 1.24044e4 438.64359

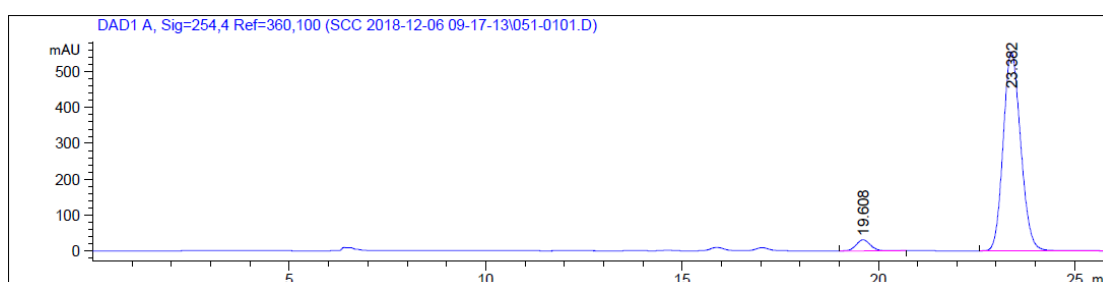

Signal 1: DAD1 A, Sig=254,4 Ref=360,100

| Peak # | RetTime [min] | Type | Width [min] | Area [mAU*s] | Height [mAU] | Area %  |
|--------|---------------|------|-------------|--------------|--------------|---------|
| 1      | 19.608        | BB   | 0.3947      | 779.69208    | 30.86169     | 4.3450  |
| 2      | 23.382        | BBA  | 0.4830      | 1.71647e4    | 554.77472    | 95.6550 |

Totals : 1.79444e4 585.63641

**(*S,Z*)-1'-benzyl-7'-bromo-3-((dimethyl(phenyl)silyl)methylene)-4-methylenespiro[cyclopentane-1,3'-indolin]-2'-one (4g)**

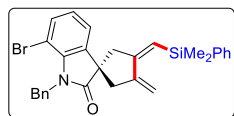

Prepared according to method F. The product **4g** was isolated in 62% yield (63.7 mg) and 94% ee.

The characterization data and spectrums of **4g** are same to **3g**.

$[\alpha]_D^{20} +26.4^\circ$  (*c* 3.10, CHCl<sub>3</sub>)

The enantiomeric excess of **4g** was determined by chiral HPLC analysis on IC-3 column.

Conditions: hexane/isopropanol = 98.8:1.2, flow rate = 0.5 mL/min, T = 25 °C, UV-Vis detection at  $\lambda = 254$  nm,  $t_{R1} = 32.3$  min (minor),  $t_{R2} = 35.0$  min (major).

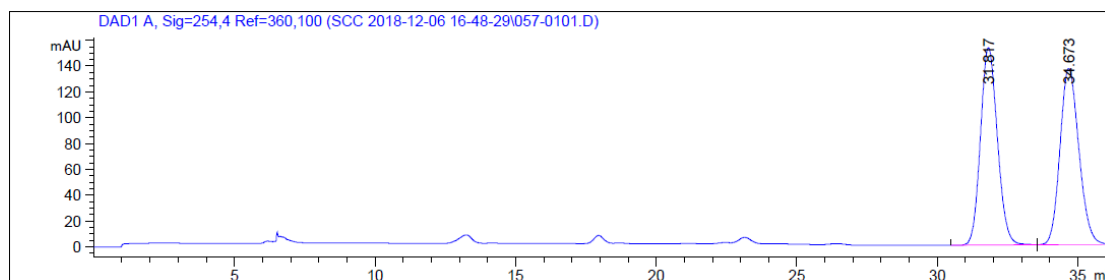

Signal 1: DAD1 A, Sig=254,4 Ref=360,100

| Peak # | RetTime [min] | Type | Width [min] | Area [mAU*s] | Height [mAU] | Area %  |
|--------|---------------|------|-------------|--------------|--------------|---------|
| 1      | 31.817        | BB   | 0.6536      | 6388.25830   | 152.85295    | 50.0958 |
| 2      | 34.673        | BBA  | 0.7240      | 6363.81348   | 136.46954    | 49.9042 |

Totals : 1.27521e4 289.32249

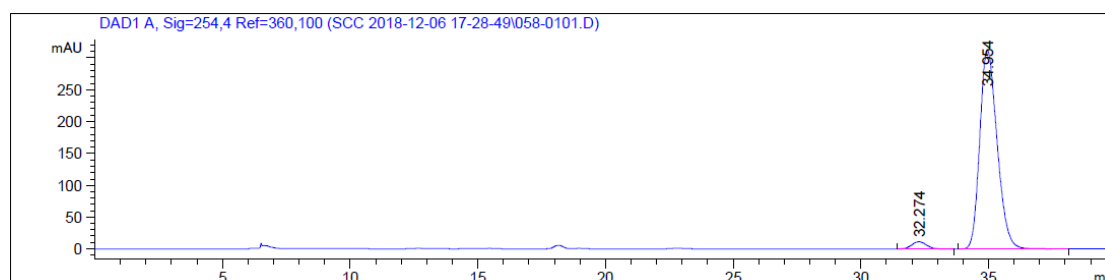

Signal 1: DAD1 A, Sig=254,4 Ref=360,100

| Peak # | RetTime [min] | Type | Width [min] | Area [mAU*s] | Height [mAU] | Area %  |
|--------|---------------|------|-------------|--------------|--------------|---------|
| 1      | 32.274        | BB   | 0.6384      | 464.55576    | 11.47335     | 3.0475  |
| 2      | 34.954        | BB   | 0.7314      | 1.47791e4    | 312.70972    | 96.9525 |

Totals : 1.52436e4 324.18307

**(*S,Z*)-1'-benzyl-3-((dimethyl(phenyl)silyl)methylene)-5'-methoxy-4-methylenespiro[cyclopentane-1,3'-indolin]-2'-one (**4h**)**

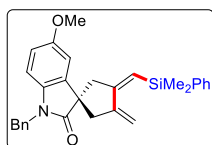

Prepared according to method F. The product **4h** was isolated in 68% yield (63.2 mg) and 92% ee.

The characterization data and spectrums of **4h** are same to **3h**.

$[\alpha]_D^{20} +16.3^\circ$  (*c* 2.06, CHCl<sub>3</sub>)

The enantiomeric excess of **4h** was determined by chiral HPLC analysis on IC-3 column.

Conditions: hexane/isopropanol = 90:10, flow rate = 0.4 mL/min, T = 25 °C, UV-Vis detection at  $\lambda = 254$  nm,  $t_{R1} = 35.5$  min (minor),  $t_{R2} = 40.4$  min (major).

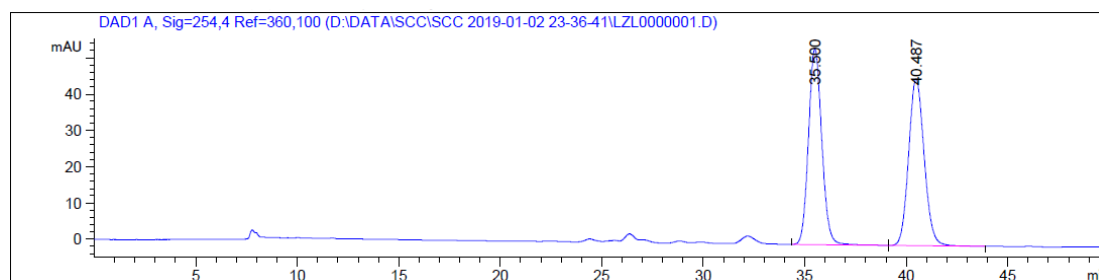

Signal 1: DAD1 A, Sig=254,4 Ref=360,100

| Peak # | RetTime [min] | Type | Width [min] | Area [mAU*s] | Height [mAU] | Area %  |
|--------|---------------|------|-------------|--------------|--------------|---------|
| 1      | 35.500        | BB   | 0.7028      | 2456.62573   | 53.99958     | 50.1020 |
| 2      | 40.487        | BB   | 0.8185      | 2446.62012   | 46.00107     | 49.8980 |

Totals : 4903.24585 100.00065

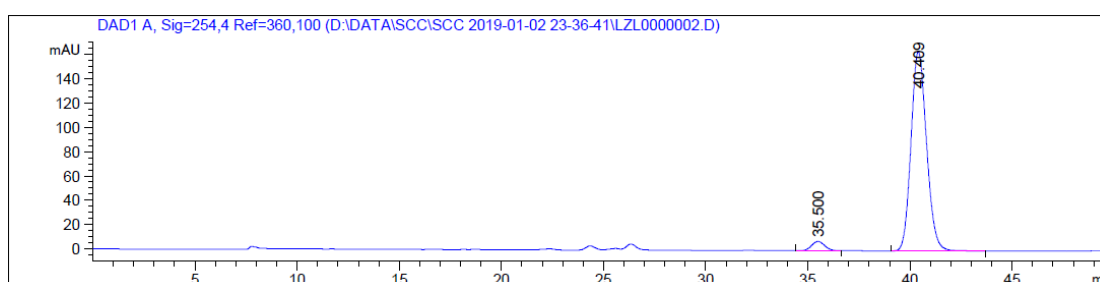

Signal 1: DAD1 A, Sig=254,4 Ref=360,100

| Peak # | RetTime [min] | Type | Width [min] | Area [mAU*s] | Height [mAU] | Area %  |
|--------|---------------|------|-------------|--------------|--------------|---------|
| 1      | 35.500        | BB   | 0.6890      | 343.56180    | 7.69335      | 3.8135  |
| 2      | 40.409        | BB   | 0.8171      | 8665.59375   | 163.82230    | 96.1865 |

Totals : 9009.15555 171.51564

**(*S,Z*)-3-((dimethyl(phenyl)silyl)methylene)-4-methylene-1'-phenylspiro[cyclopentane-1,3'-indolin]-2'-one (**4i**)**

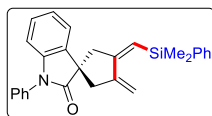

Prepared according to method F. The product **4i** was isolated in 70% yield (58.9 mg) and 92% ee. (ee value improved to 95% after recrystallization in Et<sub>2</sub>O at room temperature)

The characterization data and spectrums of **4i** are same to **3k**.

$[\alpha]_D^{20} +10.8^\circ$  (*c* 1.28, CHCl<sub>3</sub>)

The enantiomeric excess of **4i** was determined by chiral HPLC analysis on IC-3 column.

Conditions: hexane/isopropanol = 95:5, flow rate = 0.5 mL/min, T = 25 °C, UV-Vis detection at λ = 260 nm, *t*<sub>R1</sub> = 36.7 min (minor), *t*<sub>R2</sub> = 41.9 min (major).

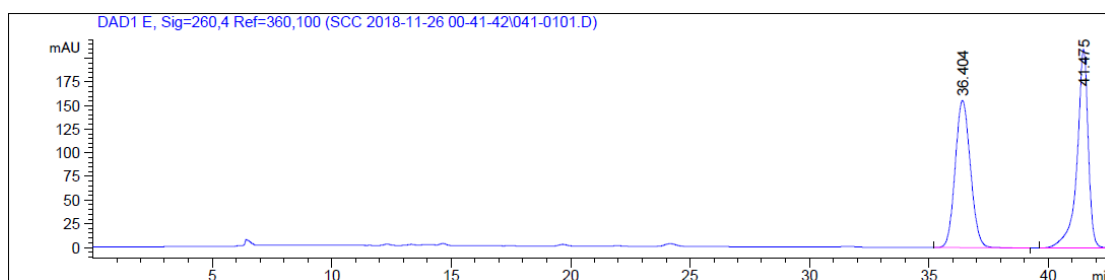

Signal 5: DAD1 E, Sig=260,4 Ref=360,100

| Peak # | RetTime [min] | Type | Width [min] | Area [mAU*s] | Height [mAU] | Area %  |
|--------|---------------|------|-------------|--------------|--------------|---------|
| 1      | 36.404        | BB   | 0.6891      | 6897.40137   | 155.60748    | 50.1393 |
| 2      | 41.475        | BBA  | 0.4809      | 6859.08838   | 210.09293    | 49.8607 |

Totals : 1.37565e4 365.70041

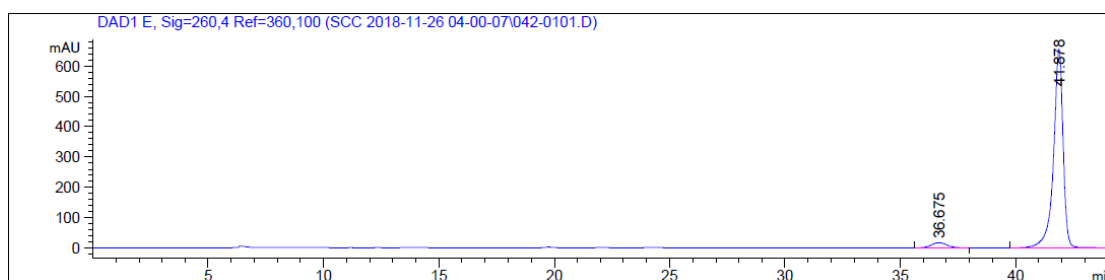

Signal 5: DAD1 E, Sig=260,4 Ref=360,100

| Peak # | RetTime [min] | Type | Width [min] | Area [mAU*s] | Height [mAU] | Area %  |
|--------|---------------|------|-------------|--------------|--------------|---------|
| 1      | 36.675        | BB   | 0.6939      | 779.98395    | 17.23628     | 3.9409  |
| 2      | 41.878        | BBA  | 0.4350      | 1.90122e4    | 654.36096    | 96.0591 |

Totals : 1.97921e4 671.59725

**(*S,Z*)-1'-acetyl-3-((dimethyl(phenyl)silyl)methylene)-4-methylenespiro[cyclopentane-1,3'-indolin]-2'-one (4j)**

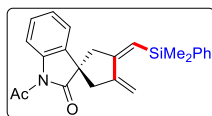

Prepared according to method F. The product **4j** was isolated in 42% yield (32.5 mg) and 69% ee.

The characterization data and spectrums of **4j** are same to **3l**.

$[\alpha]_D^{20} +8.0^\circ$  (*c* 1.04, CHCl<sub>3</sub>)

The enantiomeric excess of **4j** was determined by chiral HPLC analysis on IC-3 column.

Conditions: hexane/isopropanol = 99:1, flow rate = 0.5 mL/min, T = 25 °C, UV-Vis detection at  $\lambda = 260$  nm,  $t_{R1} = 16.7$  min (minor),  $t_{R2} = 18.2$  min (major).

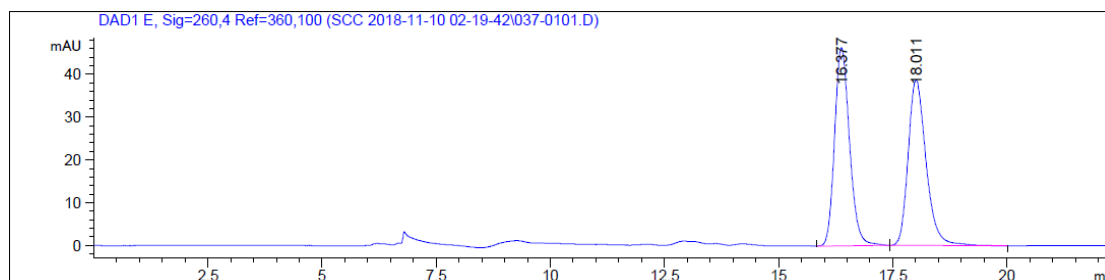

Signal 5: DAD1 E, Sig=260,4 Ref=360,100

| Peak # | RetTime [min] | Type | Width [min] | Area [mAU*s] | Height [mAU] | Area %  |
|--------|---------------|------|-------------|--------------|--------------|---------|
| 1      | 16.377        | BB   | 0.3506      | 1050.74756   | 46.32187     | 49.9254 |
| 2      | 18.011        | BB   | 0.4160      | 1053.88916   | 38.66420     | 50.0746 |

Totals : 2104.63672 84.98607

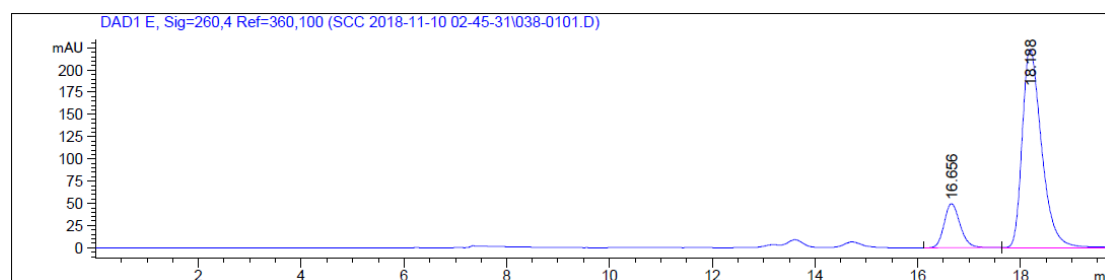

Signal 5: DAD1 E, Sig=260,4 Ref=360,100

| Peak # | RetTime [min] | Type | Width [min] | Area [mAU*s] | Height [mAU] | Area %  |
|--------|---------------|------|-------------|--------------|--------------|---------|
| 1      | 16.656        | BB   | 0.3307      | 1069.39160   | 49.75622     | 15.4793 |
| 2      | 18.188        | BBA  | 0.3992      | 5839.15283   | 223.22215    | 84.5207 |

Totals : 6908.54443 272.97837

**(*S,Z*)-3-((dimethyl(phenyl)silyl)methylene)-4-methylene-1'-propylspiro[cyclopentane-1,3'-indolin]-2'-one (4k)**

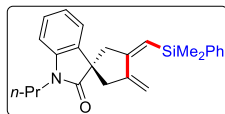

Prepared according to method F. The product **4k** was isolated in 79% yield (60.9 mg) and 85% ee.

The characterization data and spectrums of **4k** are same to **3j**.

$[\alpha]_D^{20} +13.8^\circ$  ( $c$  1.85,  $\text{CHCl}_3$ )

The enantiomeric excess of **4k** was determined by chiral HPLC analysis on IC-3 column.

Conditions: hexane/isopropanol = 90:10, flow rate = 0.4 mL/min, T = 25 °C, UV-Vis detection at  $\lambda = 273$  nm,  $t_{R1} = 19.5$  min (minor),  $t_{R2} = 23.6$  min (major).

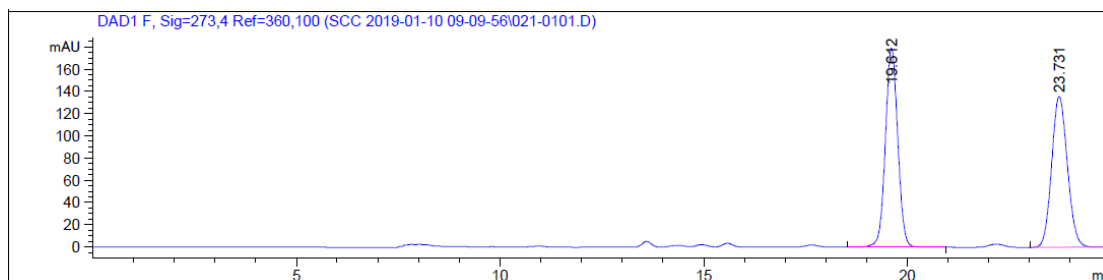

Signal 6: DAD1 F, Sig=273,4 Ref=360,100

| Peak # | RetTime [min] | Type | Width [min] | Area [mAU*s] | Height [mAU] | Area %  |
|--------|---------------|------|-------------|--------------|--------------|---------|
| 1      | 19.612        | BB   | 0.3281      | 3778.66455   | 179.12192    | 50.8861 |
| 2      | 23.731        | BB   | 0.4197      | 3647.06738   | 135.62816    | 49.1139 |

Totals : 7425.73193 314.75008

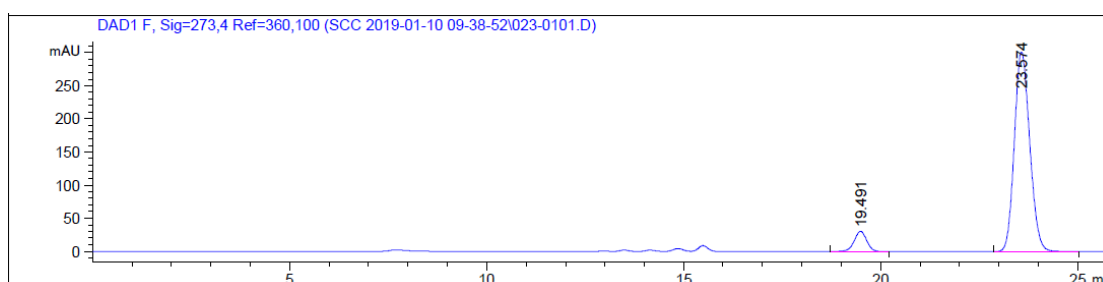

Signal 6: DAD1 F, Sig=273,4 Ref=360,100

| Peak # | RetTime [min] | Type | Width [min] | Area [mAU*s] | Height [mAU] | Area %  |
|--------|---------------|------|-------------|--------------|--------------|---------|
| 1      | 19.491        | BB   | 0.3393      | 665.52673    | 30.41373     | 7.5255  |
| 2      | 23.574        | BB   | 0.4229      | 8178.14795   | 301.06714    | 92.4745 |

Totals : 8843.67468 331.48087

**(*S,Z*)-1'-allyl-3-((dimethyl(phenyl)silyl)methylene)-4-methylenespiro[cyclopentane-1,3'-indolin]-2'-one (4I)**

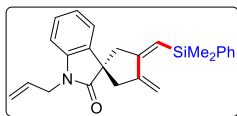

Prepared according to method F. The product **4I** was isolated in 80% yield (61.5 mg) and 88% ee.

The characterization data and spectrums of **4I** are same to **3m**.

$[\alpha]_D^{20} +14.2^\circ$  (*c* 1.80, CHCl<sub>3</sub>)

The enantiomeric excess of **4I** was determined by chiral HPLC analysis on IC-3 column.

Conditions: hexane/isopropanol = 90:10, flow rate = 0.4 mL/min, T = 25 °C, UV-Vis detection at  $\lambda = 273$  nm,  $t_{R1} = 21.2$  min (minor),  $t_{R2} = 24.2$  min (major).

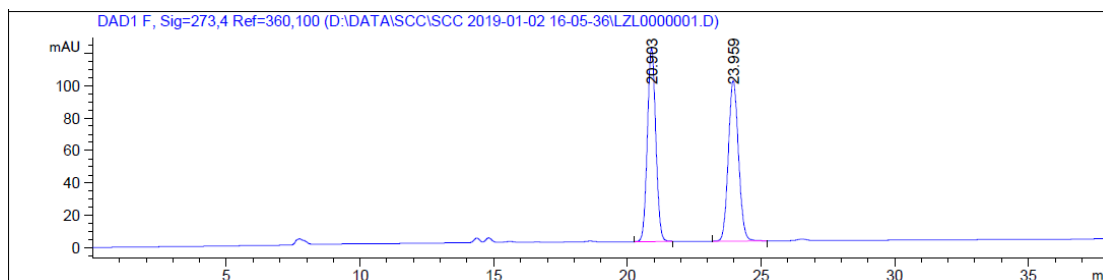

Signal 6: DAD1 F, Sig=273,4 Ref=360,100

| Peak # | RetTime [min] | Type | Width [min] | Area [mAU*s] | Height [mAU] | Area %  |
|--------|---------------|------|-------------|--------------|--------------|---------|
| 1      | 20.903        | BB   | 0.3402      | 2597.11255   | 119.20599    | 49.8888 |
| 2      | 23.959        | BB   | 0.4123      | 2608.69263   | 98.72852     | 50.1112 |

Totals : 5205.80518 217.93450

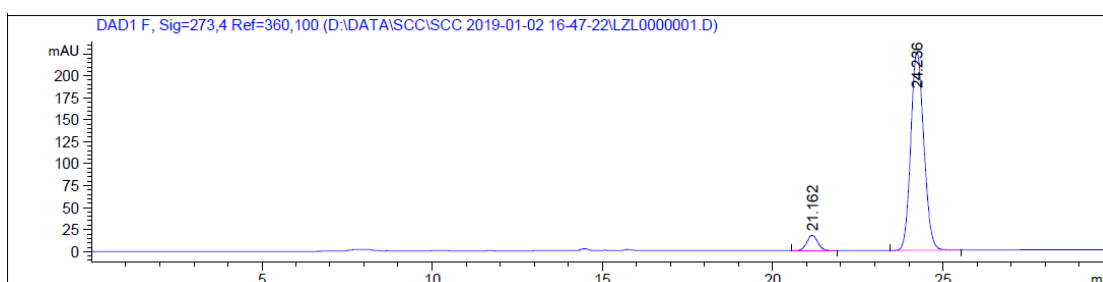

Signal 6: DAD1 F, Sig=273,4 Ref=360,100

| Peak # | RetTime [min] | Type | Width [min] | Area [mAU*s] | Height [mAU] | Area %  |
|--------|---------------|------|-------------|--------------|--------------|---------|
| 1      | 21.162        | BB   | 0.3427      | 378.80591    | 17.21802     | 5.9214  |
| 2      | 24.236        | BB   | 0.4154      | 6018.40771   | 225.45686    | 94.0786 |

Totals : 6397.21362 242.67488



**(*S,Z*)-1'-(but-2-yn-1-yl)-3-((dimethyl(phenyl)silyl)methylene)-4-methylenespiro[cyclopentane-1,3'-indolin]-2'-one (**4m**)**

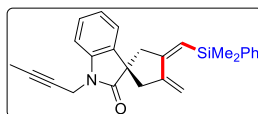

Prepared according to method F. The product **4m** was isolated in 67% yield (53.2 mg) and 91% ee.

The characterization data and spectrums of **4m** are same to **3n**.

$[\alpha]_D^{20} +10.1^\circ$  (*c* 1.51, CHCl<sub>3</sub>)

The enantiomeric excess of **4m** was determined by chiral HPLC analysis on IC-3 column.

Conditions: hexane/isopropanol = 90:10, flow rate = 0.4 mL/min, T = 25 °C, UV-Vis detection at  $\lambda = 254$  nm,  $t_{R1} = 24.0$  min (minor),  $t_{R2} = 25.8$  min (major).

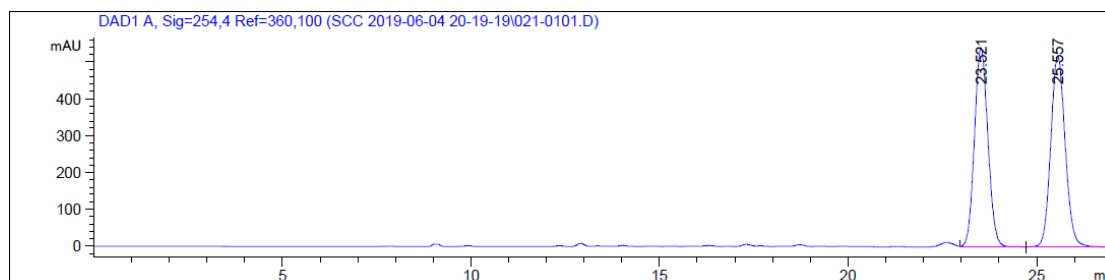

Signal 1: DAD1 A, Sig=254,4 Ref=360,100

| Peak # | RetTime [min] | Type | Width [min] | Area [mAU*s] | Height [mAU] | Area %  |
|--------|---------------|------|-------------|--------------|--------------|---------|
| 1      | 23.521        | VB   | 0.3850      | 1.33895e4    | 540.59735    | 49.1962 |
| 2      | 25.557        | BBA  | 0.4135      | 1.38270e4    | 517.91357    | 50.8038 |

Totals : 2.72165e4 1058.51093

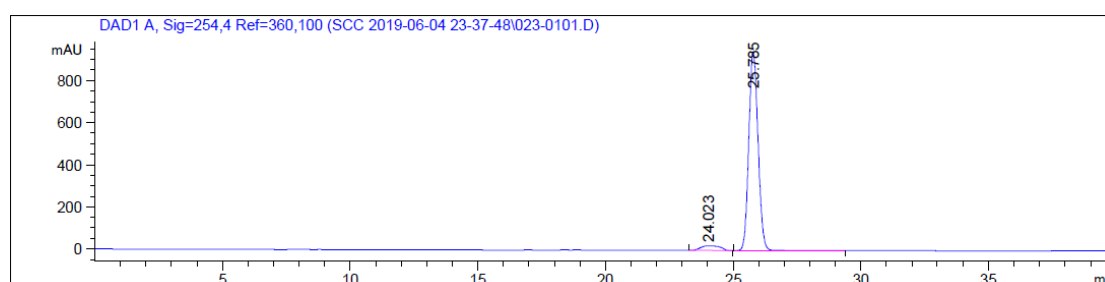

Signal 1: DAD1 A, Sig=254,4 Ref=360,100

| Peak # | RetTime [min] | Type | Width [min] | Area [mAU*s] | Height [mAU] | Area %  |
|--------|---------------|------|-------------|--------------|--------------|---------|
| 1      | 24.023        | BB   | 0.7418      | 1140.69580   | 21.61153     | 4.5832  |
| 2      | 25.785        | BB   | 0.3912      | 2.37478e4    | 944.82587    | 95.4168 |

Totals : 2.48885e4 966.43740

**(*S,Z*)-3'-((dimethyl(phenyl)silyl)methylene)-4'-methylene-2*H*-spiro[benzofuran-3,1'-cyclopentan]-2-one (**4n**)**

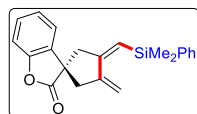

Prepared according to method **F**. The product **4n** was isolated in 51% yield (35.2 mg) and 81% ee.

$^1\text{H NMR}$  (400 MHz,  $\text{CDCl}_3$ )  $\delta$  7.62 – 7.57 (m, 2H), 7.40 – 7.36 (m, 3H), 7.31 – 7.26 (m, 1H), 7.16 – 7.06 (m, 3H), 5.83 (s, 1H), 5.33 (dd,  $J = 2.8, 1.5$  Hz, 1H), 5.03 (s, 1H), 3.32 (dd,  $J = 15.8, 2.5$  Hz, 1H), 3.17 (dt,  $J = 15.4, 2.7$  Hz, 1H), 2.78 – 2.71 (m, 1H), 2.69 – 2.61 (m, 1H), 0.46 (s, 6H).

$^{13}\text{C NMR}$  (101 MHz,  $\text{CDCl}_3$ )  $\delta$  179.6, 154.7, 152.3, 144.5, 138.9, 133.9, 132.9, 129.2, 128.8, 128.1, 124.5, 123.3, 123.0, 113.2, 110.8, 50.1, 49.1, 46.4, -1.4, -1.5.

**HRMS** (ESI):  $m/z$  Calcd. for  $\text{C}_{22}\text{H}_{23}\text{O}_2\text{Si}$   $[\text{M}+\text{H}]^+$ : 347.1467, found: 347.1468.

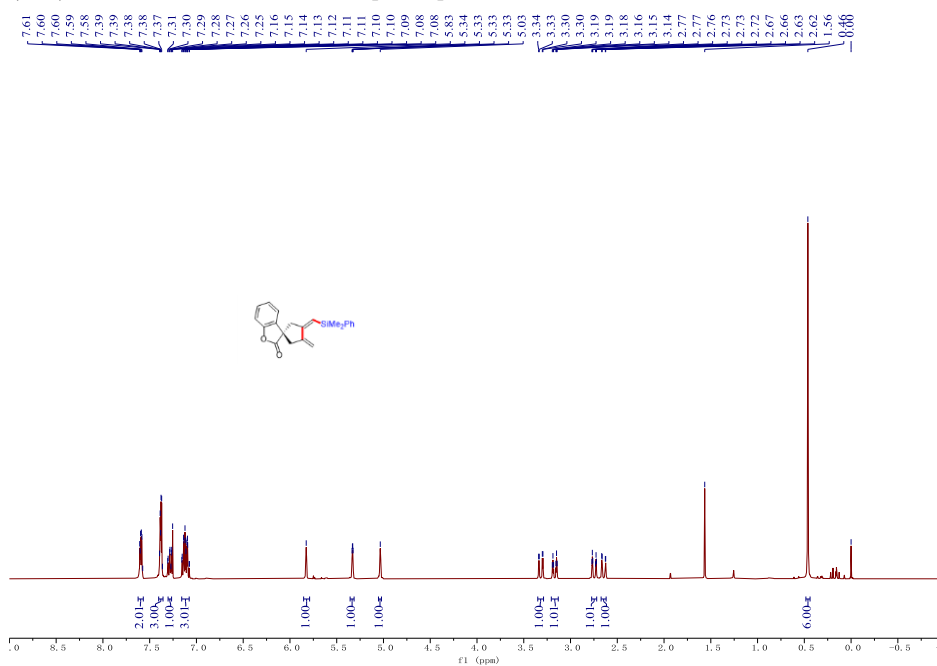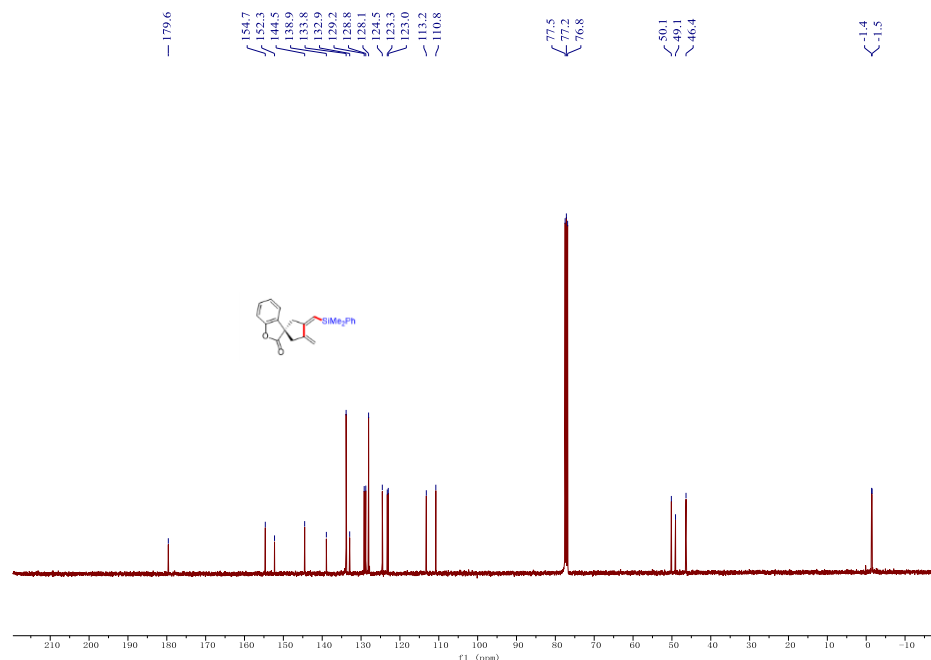

$[\alpha]_D^{20} +10.5^\circ$  ( $c$  1.45,  $\text{CHCl}_3$ )

The enantiomeric excess of **4n** was determined by chiral HPLC analysis on IC-3 column.

Conditions: hexane/isopropanol = 95:5, flow rate = 0.5 mL/min,  $T = 25^\circ\text{C}$ , UV-Vis detection at  $\lambda = 254\text{ nm}$ ,  $t_{R1} = 12.9\text{ min}$  (minor),  $t_{R2} = 13.7\text{ min}$  (major).

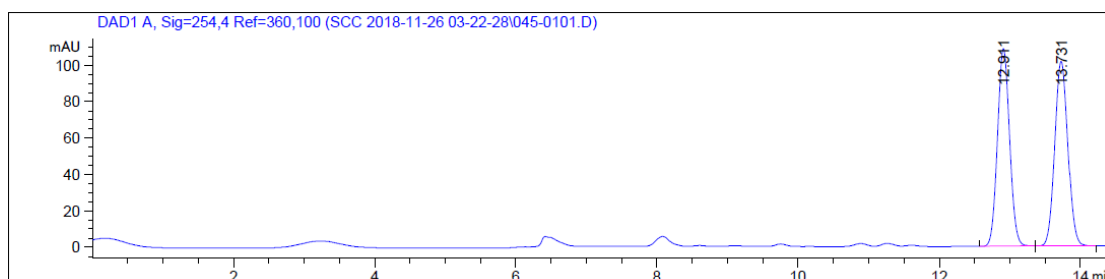

Signal 1: DAD1 A, Sig=254,4 Ref=360,100

| Peak # | RetTime [min] | Type | Width [min] | Area [mAU*s] | Height [mAU] | Area %  |
|--------|---------------|------|-------------|--------------|--------------|---------|
| 1      | 12.911        | BB   | 0.1886      | 1306.95349   | 108.46664    | 49.9653 |
| 2      | 13.731        | BB   | 0.2025      | 1308.77039   | 101.44193    | 50.0347 |

Totals : 2615.72388 209.90857

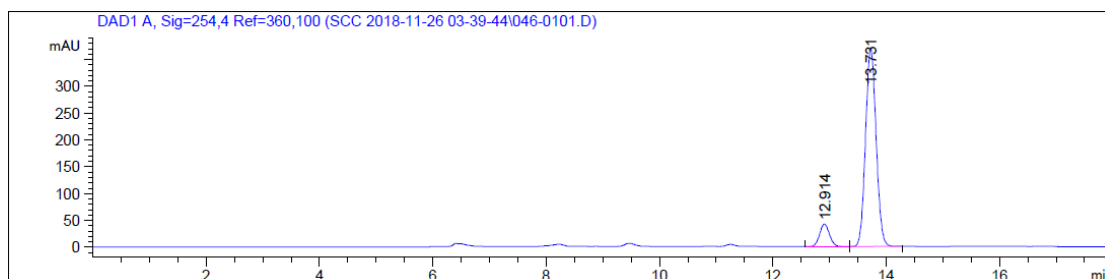

Signal 1: DAD1 A, Sig=254,4 Ref=360,100

| Peak # | RetTime [min] | Type | Width [min] | Area [mAU*s] | Height [mAU] | Area %  |
|--------|---------------|------|-------------|--------------|--------------|---------|
| 1      | 12.914        | BB   | 0.1888      | 505.69666    | 41.91538     | 9.5325  |
| 2      | 13.731        | BB   | 0.2010      | 4799.30029   | 370.70599    | 90.4675 |

Totals : 5304.99695 412.62138

**(*S,Z*)-3-((dimethyl(phenyl)silyl)methylene)-4-methylenespiro[cyclopentane-1,2'-inden]-1'(3'*H*)-one (4o)**

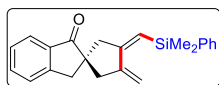

Prepared according to method F. The product **4o** was isolated in 57% yield (39.2 mg) and 56% ee.

The characterization data and spectrums of **4o** are same to **3o**.

$[\alpha]_D^{20}$  -7.1° (*c* 1.43, CHCl<sub>3</sub>)

The enantiomeric excess of **4o** was determined by chiral HPLC analysis on Chiralpak IC-3 column. Conditions: hexane/isopropanol = 99.6:0.4, flow rate = 0.5 mL/min, T = 25 °C, UV-Vis detection at  $\lambda$  = 254 nm,  $t_{R1}$  = 38.1 min (major),  $t_{R2}$  = 41.3 min (minor).

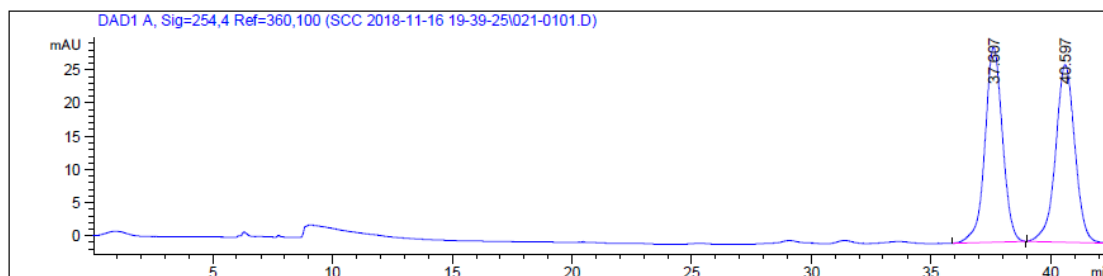

Signal 1: DAD1 A, Sig=254,4 Ref=360,100

| Peak # | RetTime [min] | Type | Width [min] | Area [mAU*s] | Height [mAU] | Area %  |
|--------|---------------|------|-------------|--------------|--------------|---------|
| 1      | 37.607        | BB   | 0.7744      | 1490.62195   | 29.35661     | 49.9529 |
| 2      | 40.597        | BBA  | 0.8569      | 1493.43420   | 26.68805     | 50.0471 |

Totals : 2984.05615 56.04466

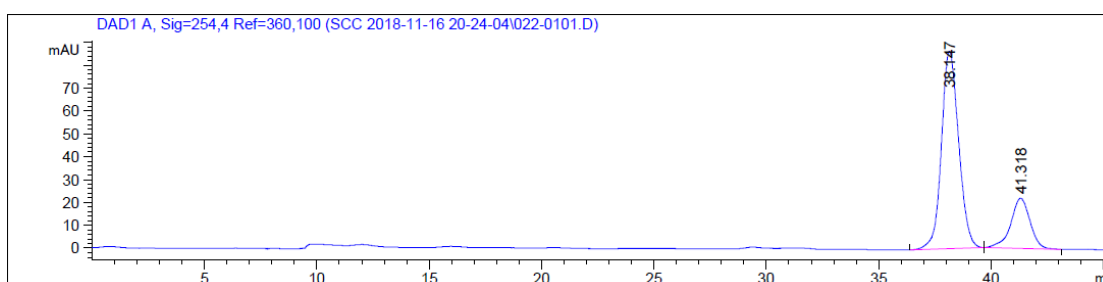

Signal 1: DAD1 A, Sig=254,4 Ref=360,100

| Peak # | RetTime [min] | Type | Width [min] | Area [mAU*s] | Height [mAU] | Area %  |
|--------|---------------|------|-------------|--------------|--------------|---------|
| 1      | 38.147        | BB   | 0.8139      | 4588.49170   | 86.35617     | 77.8924 |
| 2      | 41.318        | BB   | 0.8952      | 1302.31616   | 21.85568     | 22.1076 |

Totals : 5890.80786 108.21185

**(*S,Z*)-2'-benzyl-3-((dimethyl(phenyl)silyl)methylene)-4-methylene-1',2'-dihydro-3'*H*-spiro[cyclopentane-1,4'-isoquinolin]-3'-one (**4p**)**

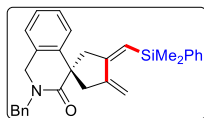

Prepared according to method F. The product **4p** was isolated in 65% yield (58.4 mg) and 95% ee.

The characterization data and spectrums of **4p** are same to **3w**.

$[\alpha]_D^{20} +15.4^\circ$  ( $c$  1.46,  $\text{CHCl}_3$ )

The enantiomeric excess of **4p** was determined by chiral HPLC analysis on IC-3 column.

Conditions: hexane/isopropanol = 80:20, flow rate = 0.4 mL/min, T = 25 °C, UV-Vis detection at  $\lambda = 254$  nm,  $t_{R1} = 30.8$  min (minor),  $t_{R2} = 33.8$  min (major).

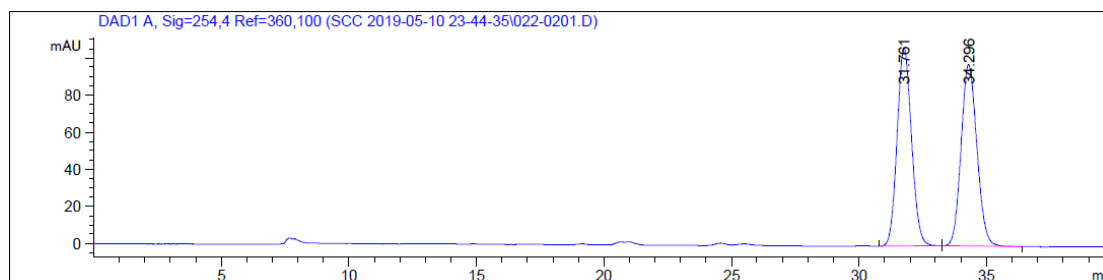

Signal 1: DAD1 A, Sig=254,4 Ref=360,100

| Peak # | RetTime [min] | Type | Width [min] | Area [mAU*s] | Height [mAU] | Area %  |
|--------|---------------|------|-------------|--------------|--------------|---------|
| 1      | 31.761        | BB   | 0.6146      | 4199.35352   | 106.82281    | 49.9310 |
| 2      | 34.296        | BB   | 0.6767      | 4210.95752   | 97.72299     | 50.0690 |

Totals : 8410.31104 204.54580

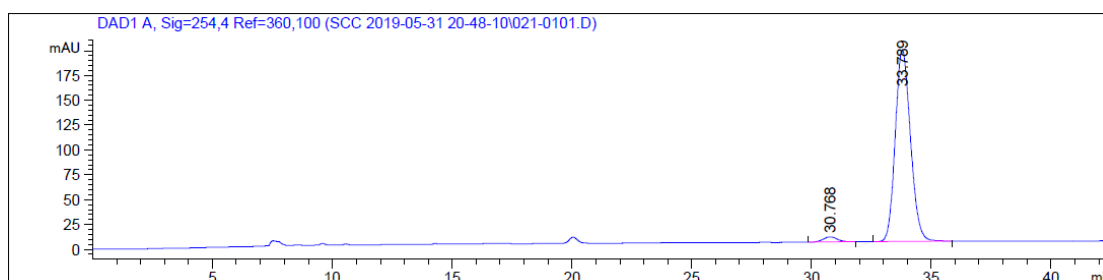

Signal 1: DAD1 A, Sig=254,4 Ref=360,100

| Peak # | RetTime [min] | Type | Width [min] | Area [mAU*s] | Height [mAU] | Area %  |
|--------|---------------|------|-------------|--------------|--------------|---------|
| 1      | 30.768        | BB   | 0.5708      | 212.23781    | 5.19277      | 2.4351  |
| 2      | 33.789        | BB   | 0.6846      | 8503.35938   | 192.77992    | 97.5649 |

Totals : 8715.59718 197.97270

**(*S,Z*)-3-((dimethyl(phenyl)silyl)methylene)-4-methylenespiro[cyclopentane-1,4'-isochroman]-3'-one (**4q**)**

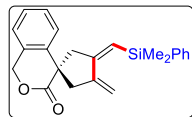

Prepared according to method **F**. The product **4q** was isolated in 65% yield (46.8 mg) and 87% ee.

**<sup>1</sup>H NMR** (400 MHz, CDCl<sub>3</sub>) δ 7.55 – 7.50 (m, 2H), 7.37 – 7.29 (m, 6H), 7.23 – 7.19 (m, 1H), 5.73 (d, *J* = 2.4 Hz, 1H), 5.39 (d, *J* = 14.2 Hz, 1H), 5.34 (d, *J* = 14.5 Hz, 1H), 5.21 (dd, *J* = 3.2, 1.5 Hz, 1H), 4.98 (t, *J* = 2.1 Hz, 1H), 3.51 (dd, *J* = 15.9, 2.6 Hz, 1H), 3.44 (dt, *J* = 15.9, 2.9 Hz, 1H), 2.90 – 2.78 (m, 2H), 0.41 (s, 3H), 0.38 (s, 3H).

**<sup>13</sup>C NMR** (101 MHz, CDCl<sub>3</sub>) δ 174.5, 155.4, 144.9, 138.9, 138.3, 133.9, 131.2, 129.1, 128.8, 128.0, 127.4, 125.5, 125.0, 122.3, 112.6, 69.2, 49.3, 48.0, 43.7, -1.2, -1.6.

**HRMS** (ESI): *m/z* Calcd. for C<sub>23</sub>H<sub>25</sub>O<sub>2</sub>Si [M+H]<sup>+</sup>: 361.1624, found: 361.1623.

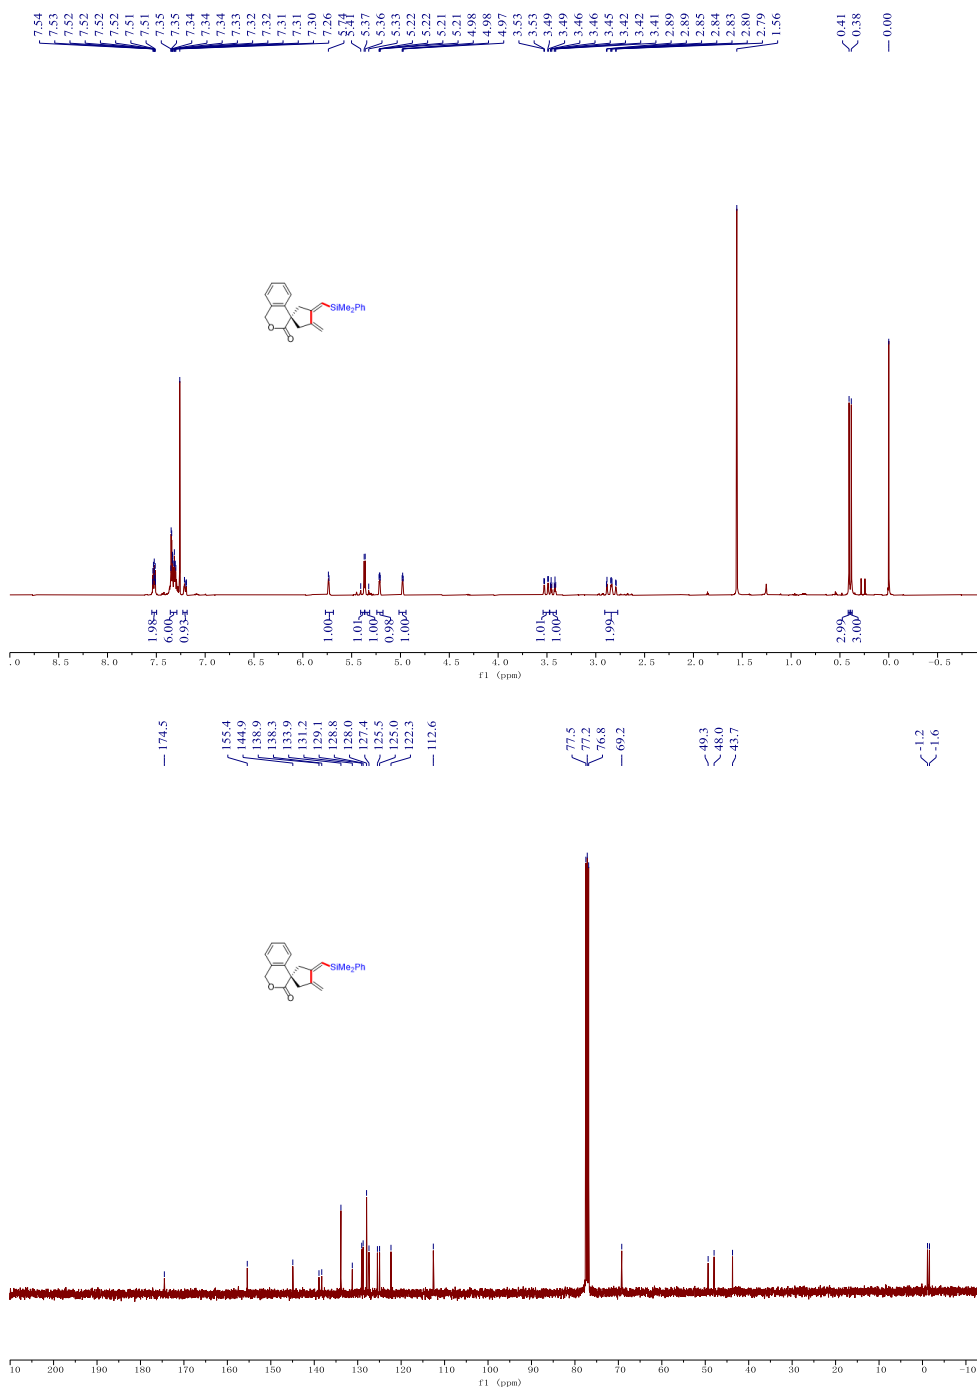

$[\alpha]_D^{20}$  -2.3° (c 2.33, CHCl<sub>3</sub>)

The enantiomeric excess of **4q** was determined by chiral HPLC analysis on OJ-3 column.

Conditions: hexane/isopropanol = 80:20, flow rate = 0.35 mL/min, T = 25 °C, UV-Vis detection at  $\lambda = 254$  nm,  $t_{R1} = 32.2$  min (major),  $t_{R2} = 42.4$  min (minor).

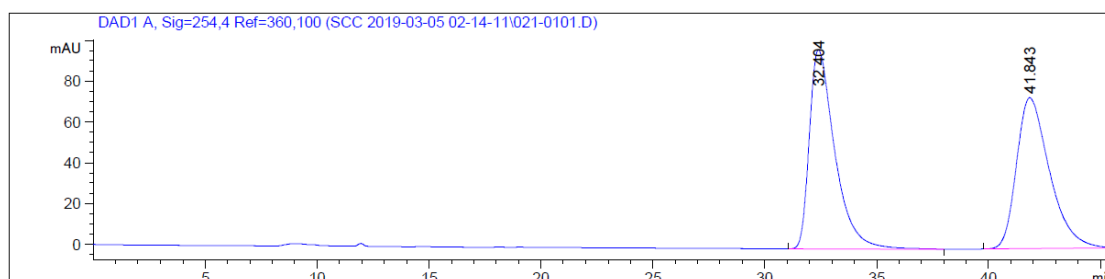

Signal 1: DAD1 A, Sig=254,4 Ref=360,100

| Peak # | RetTime [min] | Type | Width [min] | Area [mAU*s] | Height [mAU] | Area %  |
|--------|---------------|------|-------------|--------------|--------------|---------|
| 1      | 32.404        | BB   | 1.1816      | 7726.62402   | 97.60458     | 50.4137 |
| 2      | 41.843        | BBA  | 1.5223      | 7599.79834   | 73.99151     | 49.5863 |

Totals : 1.53264e4 171.59608

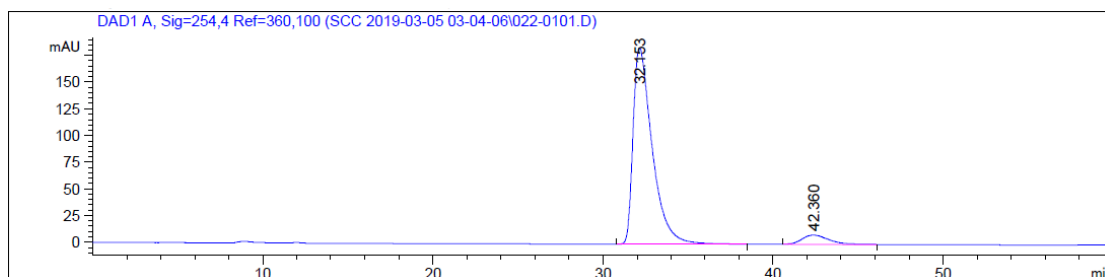

Signal 1: DAD1 A, Sig=254,4 Ref=360,100

| Peak # | RetTime [min] | Type | Width [min] | Area [mAU*s] | Height [mAU] | Area %  |
|--------|---------------|------|-------------|--------------|--------------|---------|
| 1      | 32.153        | BB   | 1.1682      | 1.43874e4    | 184.01392    | 93.7338 |
| 2      | 42.360        | BB   | 1.2960      | 961.81494    | 8.82151      | 6.2662  |

Totals : 1.53492e4 192.83542

**(*S,Z*)-3-((dimethyl(phenyl)silyl)methylene)-4-methylene-3',4'-dihydro-2'*H*-spiro[cyclopentane-1,1'-naphthalen]-2'-one (**4r**)**

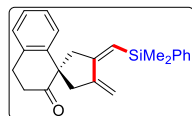

Prepared according to method F. The product **4r** was isolated in 78% yield (55.8 mg) and 85% ee.

The characterization data and spectrums of **4r** are same to **3s**.

$[\alpha]_D^{20} +19.9^\circ$  (*c* 1.72, CHCl<sub>3</sub>)

The enantiomeric excess of **4r** was determined by chiral HPLC analysis on IC-3 column.

Conditions: hexane/isopropanol = 90:10, flow rate = 0.4 mL/min, T = 25 °C, UV-Vis detection at  $\lambda = 230$  nm,  $t_{R1} = 12.9$  min (minor),  $t_{R2} = 14.0$  min (major).

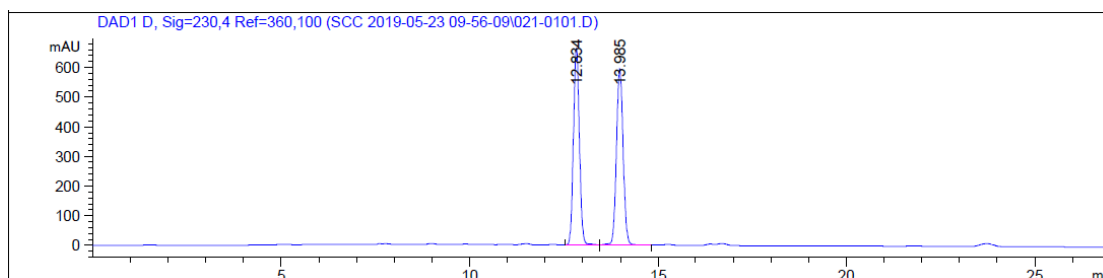

Signal 4: DAD1 D, Sig=230,4 Ref=360,100

| Peak # | RetTime [min] | Type | Width [min] | Area [mAU*s] | Height [mAU] | Area %  |
|--------|---------------|------|-------------|--------------|--------------|---------|
| 1      | 12.834        | BB   | 0.1726      | 7299.65820   | 662.39099    | 49.8869 |
| 2      | 13.985        | BB   | 0.1941      | 7332.76074   | 593.86212    | 50.1131 |

Totals : 1.46324e4 1256.25311

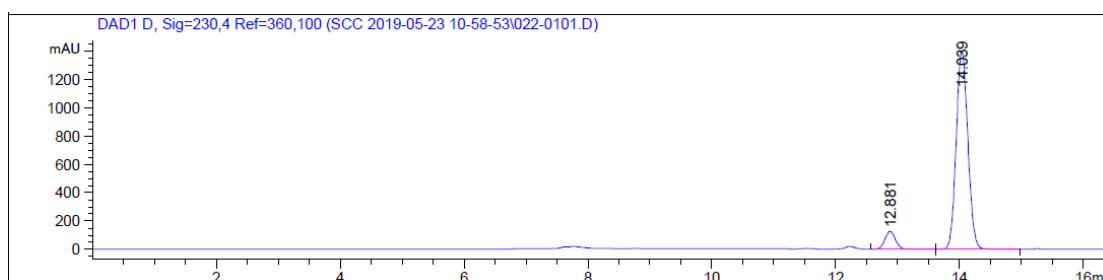

Signal 4: DAD1 D, Sig=230,4 Ref=360,100

| Peak # | RetTime [min] | Type | Width [min] | Area [mAU*s] | Height [mAU] | Area %  |
|--------|---------------|------|-------------|--------------|--------------|---------|
| 1      | 12.881        | BB   | 0.1827      | 1472.31384   | 125.61085    | 7.4383  |
| 2      | 14.039        | BB   | 0.2043      | 1.83213e4    | 1403.66333   | 92.5617 |

Totals : 1.97936e4 1529.27418



**(S)-Diethyl 1'-benzyl-4-(dimethyl(phenyl)silyl)-2'-oxo-1,3,4,7-tetrahydrospiro[indene-2,3'-indo-line]-5,6-dicarboxylate (5a)**

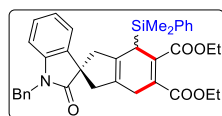

Prepared according to method G The product **5a** was obtained as white solid in 76% yield (91.9 mg, dr = 61:39).

**(5a major)**  $^1\text{H NMR}$  (400 MHz,  $\text{CDCl}_3$ )  $\delta$  7.63 – 7.57 (m, 2H), 7.38 – 7.22 (m, 8H), 7.20 (ddd,  $J = 7.4, 1.4, 0.5$  Hz, 1H), 7.09 (td,  $J = 7.7, 1.3$  Hz, 1H), 6.96 (td,  $J = 7.5, 1.0$  Hz, 1H), 6.66 (dt,  $J = 7.7, 0.8$  Hz, 1H), 4.92 (d,  $J = 15.7$  Hz, 1H), 4.88 (d,  $J = 15.7$  Hz, 1H), 4.30 – 4.15 (m, 2H), 4.01 (q,  $J = 7.1$  Hz, 2H), 3.27 – 3.19 (m, 1H), 2.98 (d,  $J = 15.9$  Hz, 1H), 2.87 (d,  $J = 16.2$  Hz, 1H), 2.85 – 2.74 (m, 1H), 2.69 – 2.56 (m, 1H), 2.50 – 2.38 (m, 2H), 1.31 (t,  $J = 7.1$  Hz, 3H), 1.25 (t,  $J = 7.2$  Hz, 3H), 0.46 (s, 3H), 0.42 (s, 3H).

$^{13}\text{C NMR}$  (101 MHz,  $\text{CDCl}_3$ )  $\delta$  181.3, 169.1, 167.7, 141.9, 136.6, 136.6, 136.2, 135.6, 134.4, 132.9, 132.8, 129.5, 128.9, 127.8, 127.7, 127.6, 127.5, 127.3, 123.1, 122.2, 108.8, 61.3, 61.1, 52.0, 47.5, 47.0, 43.8, 34.5, 29.9, 14.2, 14.0, -3.0, -3.6.

**HRMS** (ESI):  $m/z$  Calcd. for  $\text{C}_{37}\text{H}_{40}\text{NO}_5\text{Si}$   $[\text{M}+\text{H}]^+$ : 606.2676, found: 606.2673.

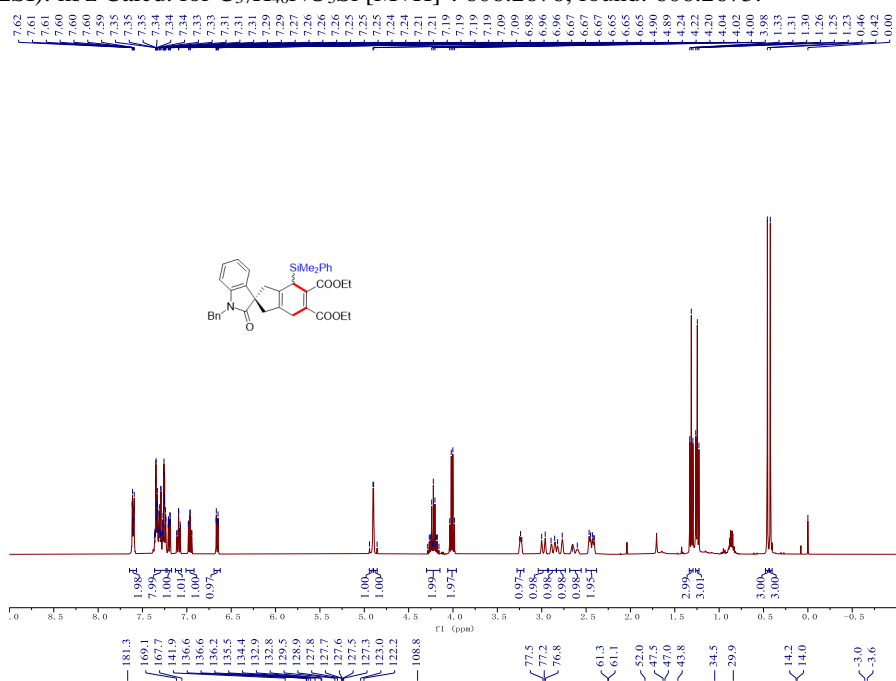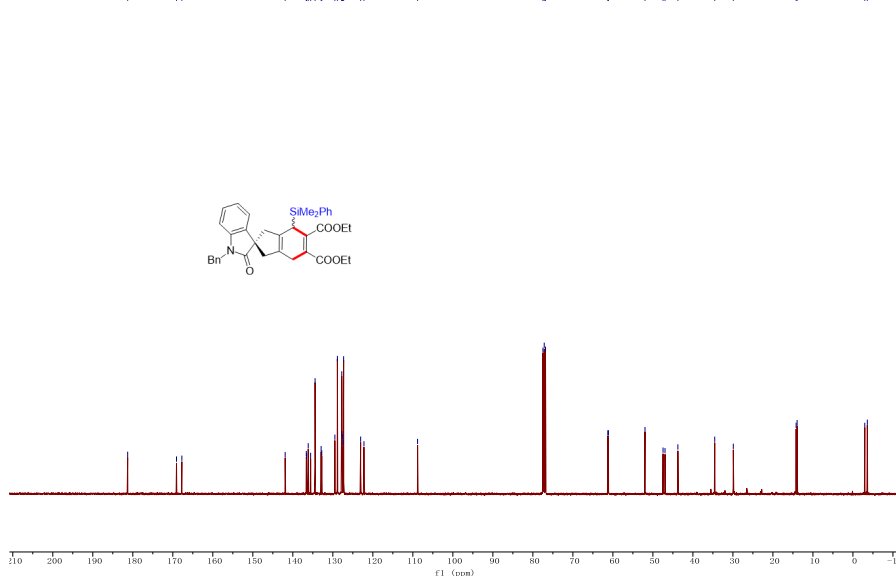

**5a (major):** (91% ee)  $[\alpha]_D^{20}$  -12.5° (*c* 1.83, CHCl<sub>3</sub>)

The enantiomeric excess of **5a (major)** was determined by chiral HPLC analysis on IC-3 column. Conditions: hexane/isopropanol = 90:10, flow rate = 0.4 mL/min, T = 25 °C, UV-Vis detection at  $\lambda$  = 210 nm,  $t_{R1}$  = 36.6 min (minor),  $t_{R2}$  = 45.1 min (major).

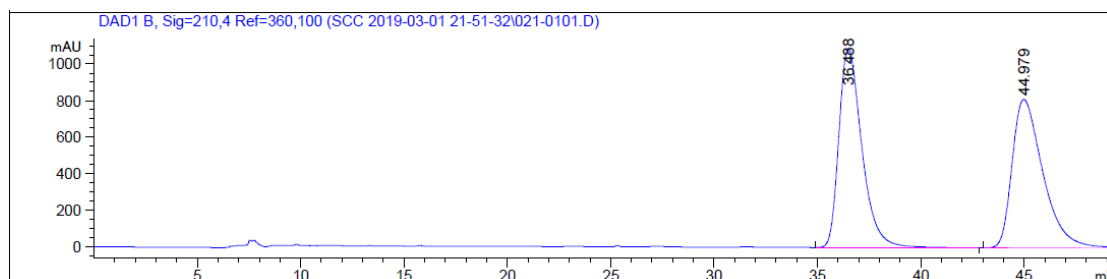

Signal 2: DAD1 B, Sig=210,4 Ref=360,100

| Peak # | RetTime [min] | Type | Width [min] | Area [mAU*s] | Height [mAU] | Area %  |
|--------|---------------|------|-------------|--------------|--------------|---------|
| 1      | 36.488        | BB   | 1.1844      | 8.41248e4    | 1090.01758   | 50.1956 |
| 2      | 44.979        | BBA  | 1.5403      | 8.34692e4    | 811.30933    | 49.8044 |

Totals : 1.67594e5 1901.32690

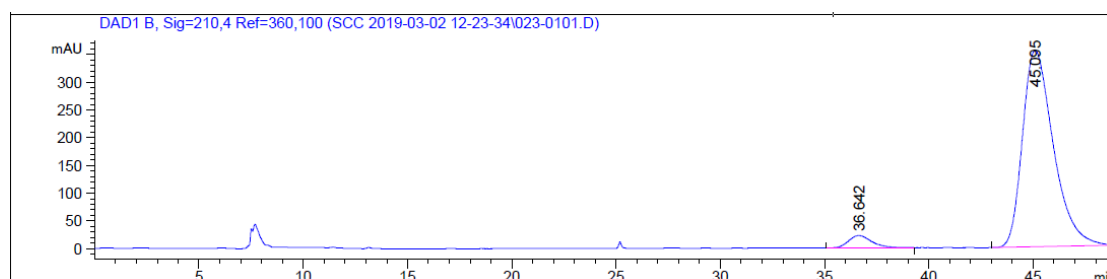

Signal 2: DAD1 B, Sig=210,4 Ref=360,100

| Peak # | RetTime [min] | Type | Width [min] | Area [mAU*s] | Height [mAU] | Area %  |
|--------|---------------|------|-------------|--------------|--------------|---------|
| 1      | 36.642        | BB   | 1.0039      | 1749.68176   | 22.33530     | 4.5781  |
| 2      | 45.095        | BBA  | 1.5377      | 3.64691e4    | 354.07010    | 95.4219 |

Totals : 3.82188e4 376.40540

**(5a (minor))**  $^1\text{H NMR}$  (400 MHz,  $\text{CDCl}_3$ )  $\delta$  7.54 (dd,  $J = 7.4, 2.0$  Hz, 2H), 7.37 – 7.21 (m, 8H), 7.12 (ddd,  $J = 7.8, 5.5, 3.5$  Hz, 1H), 7.00 (dd,  $J = 4.1, 1.4$  Hz, 2H), 6.67 (dt,  $J = 7.8, 0.9$  Hz, 1H), 4.87 (s, 2H), 4.29 – 4.13 (m, 2H), 4.01 – 3.87 (m, 2H), 3.25 (dt,  $J = 5.2, 2.7$  Hz, 1H), 2.93 – 2.83 (m, 4H), 2.63 – 2.53 (m, 1H), 2.48 – 2.39 (m, 1H), 1.30 (t,  $J = 7.2$  Hz, 3H), 1.21 (t,  $J = 7.2$  Hz, 3H), 0.42 (s, 3H), 0.38 (s, 3H).  $^{13}\text{C NMR}$  (101 MHz,  $\text{CDCl}_3$ )  $\delta$  181.5, 168.9, 167.6, 141.9, 137.1, 136.8, 136.1, 135.9, 134.1, 132.8, 132.5, 129.6, 128.9, 127.9, 127.7, 127.7, 127.5, 127.4, 122.9, 122.1, 109.0, 61.2, 61.1, 51.6, 47.9, 47.3, 43.9, 34.3, 30.0, 14.2, 14.0, -2.7, -3.1.

**HRMS** (ESI):  $m/z$  Calcd. for  $\text{C}_{37}\text{H}_{40}\text{NO}_5\text{Si}$   $[\text{M}+\text{H}]^+$ : 606.2676, found: 606.2672.

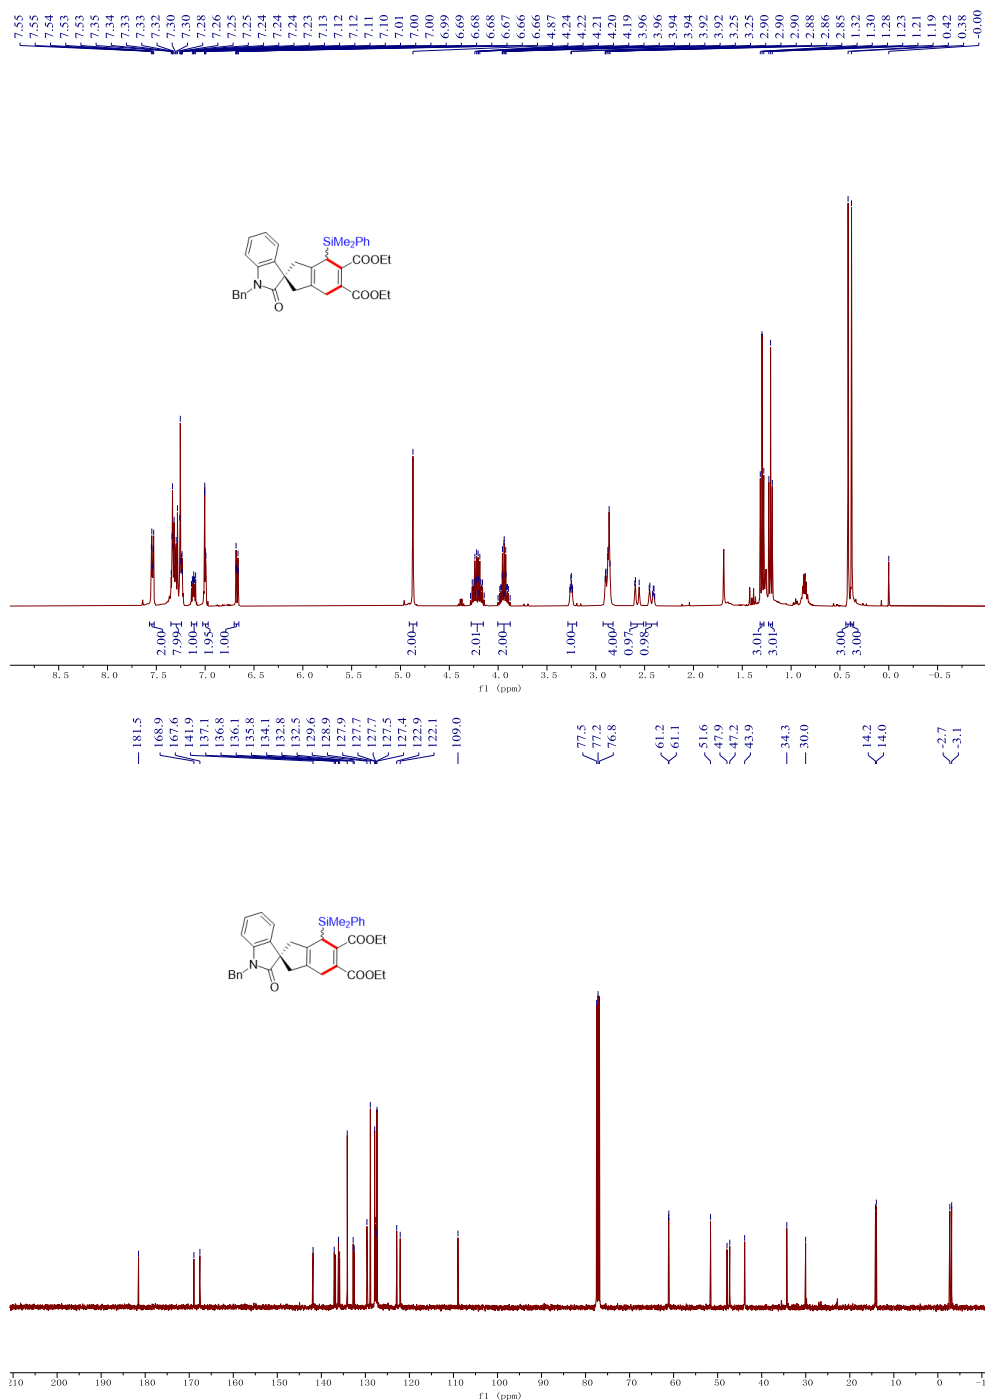

**5a (minor):** (90% ee)  $[\alpha]_D^{20}$  -9.9° (c 1.02, CHCl<sub>3</sub>)

The enantiomeric excess of **5a (minor)** was determined by chiral HPLC analysis on Chiralpak IC-3 column.

Conditions: hexane/isopropanol = 65:35, flow rate = 0.3 mL/min, T = 25 °C, UV-Vis detection at  $\lambda$  = 214 nm,  $t_{R1}$  = 48.3 min (major),  $t_{R2}$  = 61.2 min (minor).

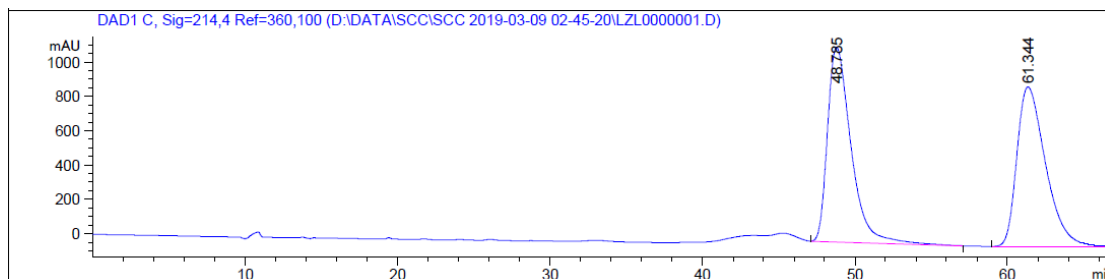

Signal 3: DAD1 C, Sig=214,4 Ref=360,100

| Peak # | RetTime [min] | Type | Width [min] | Area [mAU*s] | Height [mAU] | Area %  |
|--------|---------------|------|-------------|--------------|--------------|---------|
| 1      | 48.785        | BB   | 1.6246      | 1.21734e5    | 1133.78870   | 50.1471 |
| 2      | 61.344        | BBA  | 1.9520      | 1.21020e5    | 927.66992    | 49.8529 |

Totals : 2.42754e5 2061.45862

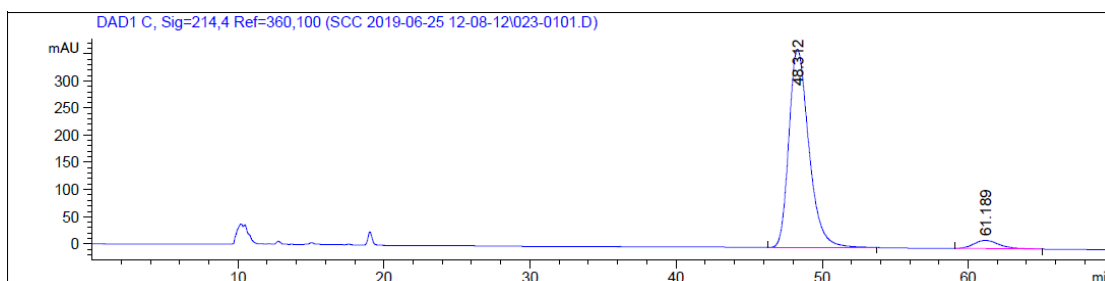

Signal 3: DAD1 C, Sig=214,4 Ref=360,100

| Peak # | RetTime [min] | Type | Width [min] | Area [mAU*s] | Height [mAU] | Area %  |
|--------|---------------|------|-------------|--------------|--------------|---------|
| 1      | 48.312        | BB   | 1.4332      | 3.47244e4    | 365.22043    | 95.0099 |
| 2      | 61.189        | BB   | 1.4242      | 1823.80042   | 15.21760     | 4.9901  |

Totals : 3.65482e4 380.43803

**(S)-1'-benzyl-5-(dimethyl(phenyl)silyl)-2-phenyl-6,9-dihydro-1*H*,5*H*,8*H*-  
spiro[cyclopenta[*d*][1,2,4]triazolo[1,2-*a*]pyridazine-7,3'-indoline]-1,2',3(2*H*)-trione** (**6a**  
**(major)**)

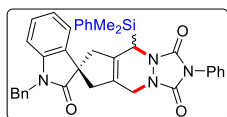

Prepared according to the above general method **G**. The product **6a (major)** was obtained as white solid.

**(6a (major))** <sup>1</sup>H NMR (400 MHz, CDCl<sub>3</sub>) δ 7.56 (dd, *J* = 8.0, 1.5 Hz, 2H), 7.47 (d, *J* = 4.1 Hz, 4H), 7.46 – 7.21 (m, 9H), 7.13 (td, *J* = 7.7, 1.2 Hz, 1H), 6.96 (td, *J* = 7.6, 1.0 Hz, 1H), 6.69 (dt, *J* = 7.8, 0.8 Hz, 1H), 6.69 – 6.62 (m, 1H), 4.89 (d, *J* = 15.6 Hz, 1H), 4.84 (d, *J* = 15.7 Hz, 1H), 4.60 (s, 1H), 4.31 (d, *J* = 15.8 Hz, 1H), 4.09 (d, *J* = 14.5 Hz, 1H), 3.00 (d, *J* = 16.0 Hz, 1H), 2.91 (d, *J* = 16.4 Hz, 1H), 2.60 (d, *J* = 16.0 Hz, 1H), 2.47 (d, *J* = 17.3 Hz, 1H), 0.52 (s, 3H), 0.50 (s, 3H).

<sup>13</sup>C NMR (101 MHz, CDCl<sub>3</sub>) δ 180.9, 154.2, 149.7, 142.1, 135.9, 135.7, 135.0, 134.3, 131.6, 131.5, 130.2, 129.2, 129.0, 128.4, 128.2, 128.2, 127.8, 127.4, 125.5, 124.6, 123.2, 122.3, 109.2, 50.9, 48.7, 46.4, 46.3, 45.3, 44.0, -2.6, -3.1.

**HRMS (ESI):** *m/z* Calcd. for C<sub>37</sub>H<sub>35</sub>N<sub>4</sub>O<sub>3</sub>Si [M+H]<sup>+</sup>: 611.2478, found: 611.2480.

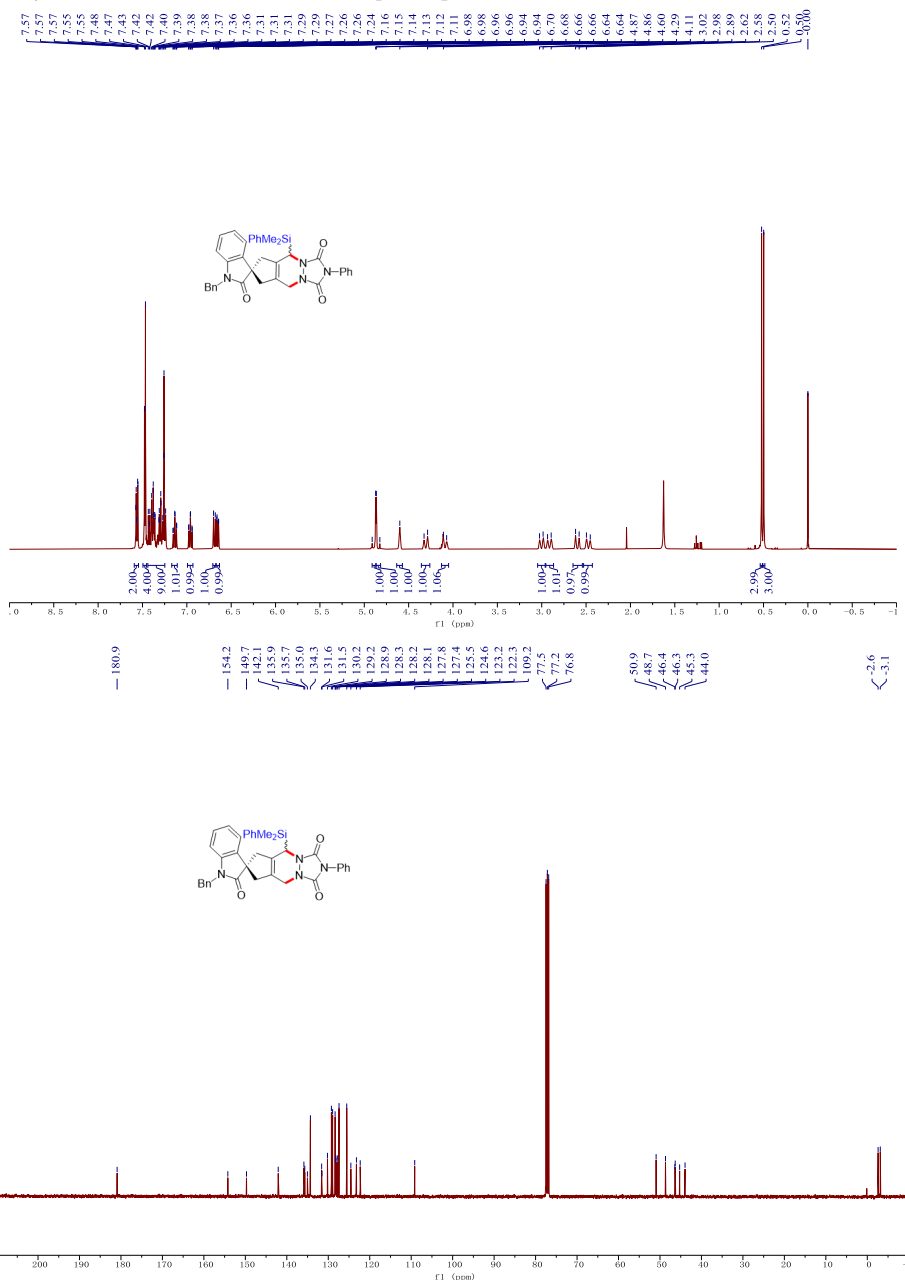

**6a (major):** (88% ee),  $[\alpha]_D^{20}$  -141.4° (c 1.16, CHCl<sub>3</sub>)

The enantiomeric excess of **6a (major)** was determined by chiral HPLC analysis on IB column.

Conditions: hexane/isopropanol = 70:30, flow rate = 0.6 mL/min, T = 25 °C, UV-Vis detection at  $\lambda$  = 210 nm,  $t_{R1}$  = 38.8 min (minor),  $t_{R2}$  = 45.6 min (major).

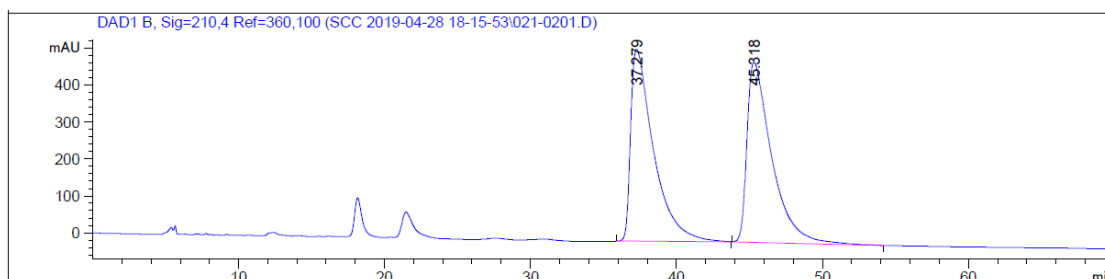

Signal 2: DAD1 B, Sig=210,4 Ref=360,100

| Peak # | RetTime [min] | Type | Width [min] | Area [mAU*s] | Height [mAU] | Area %  |
|--------|---------------|------|-------------|--------------|--------------|---------|
| 1      | 37.279        | BB   | 1.5180      | 5.64965e4    | 518.98224    | 49.6820 |
| 2      | 45.318        | BB   | 1.6198      | 5.72198e4    | 486.63623    | 50.3180 |

Totals : 1.13716e5 1005.61847

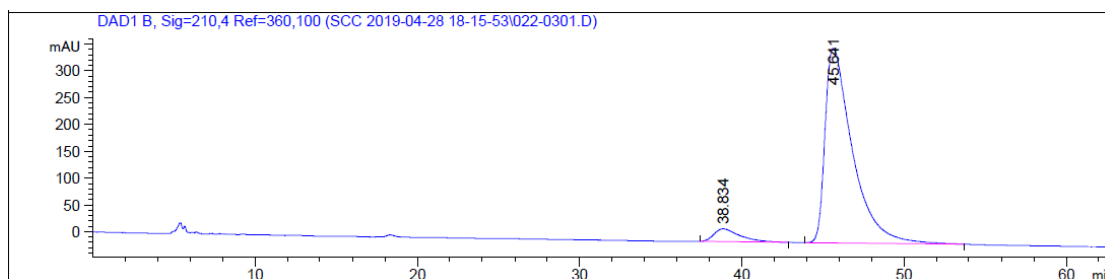

Signal 2: DAD1 B, Sig=210,4 Ref=360,100

| Peak # | RetTime [min] | Type | Width [min] | Area [mAU*s] | Height [mAU] | Area %  |
|--------|---------------|------|-------------|--------------|--------------|---------|
| 1      | 38.834        | BB   | 1.3157      | 2668.97363   | 23.88519     | 5.8790  |
| 2      | 45.641        | BB   | 1.6314      | 4.27298e4    | 362.96719    | 94.1210 |

Totals : 4.53988e4 386.85238

**(6a (minor))**  $^1\text{H NMR}$  (400 MHz,  $\text{CDCl}_3$ )  $\delta$  7.63 (dd,  $J = 7.5, 2.0$  Hz, 2H), 7.48 – 7.42 (m, 4H), 7.40 – 7.23 (m, 9H), 7.19 (ddd,  $J = 7.4, 1.4, 0.6$  Hz, 1H), 7.13 (td,  $J = 7.7, 1.3$  Hz, 1H), 6.98 (td,  $J = 7.5, 1.0$  Hz, 1H), 6.70 (dt,  $J = 7.8, 0.8$  Hz, 1H), 4.92 (s, 2H), 4.61 (s, 1H), 4.20 (d,  $J = 16.0$  Hz, 1H), 4.06 (d,  $J = 14.4$  Hz, 1H), 3.07 (dq,  $J = 15.7, 2.0$  Hz, 1H), 2.93 (d,  $J = 16.2$  Hz, 1H), 2.65 (d,  $J = 15.8$  Hz, 1H), 2.52 (d,  $J = 16.1$  Hz, 1H), 0.60 (s, 3H), 0.50 (s, 3H).

$^{13}\text{C NMR}$  (101 MHz,  $\text{CDCl}_3$ )  $\delta$  180.4, 153.6, 149.7, 141.9, 135.9, 135.7, 134.7, 134.3, 131.9, 131.5, 130.2, 129.1, 128.9, 128.2, 128.2, 128.1, 127.8, 127.3, 125.4, 124.5, 123.3, 122.0, 109.2, 51.7, 49.0, 46.1, 46.0, 45.0, 43.9, -2.9, -4.0.

**HRMS** (ESI):  $m/z$  Calcd. for  $\text{C}_{37}\text{H}_{35}\text{N}_4\text{O}_3\text{Si}$   $[\text{M}+\text{H}]^+$ : 611.2478, found: 611.2488.

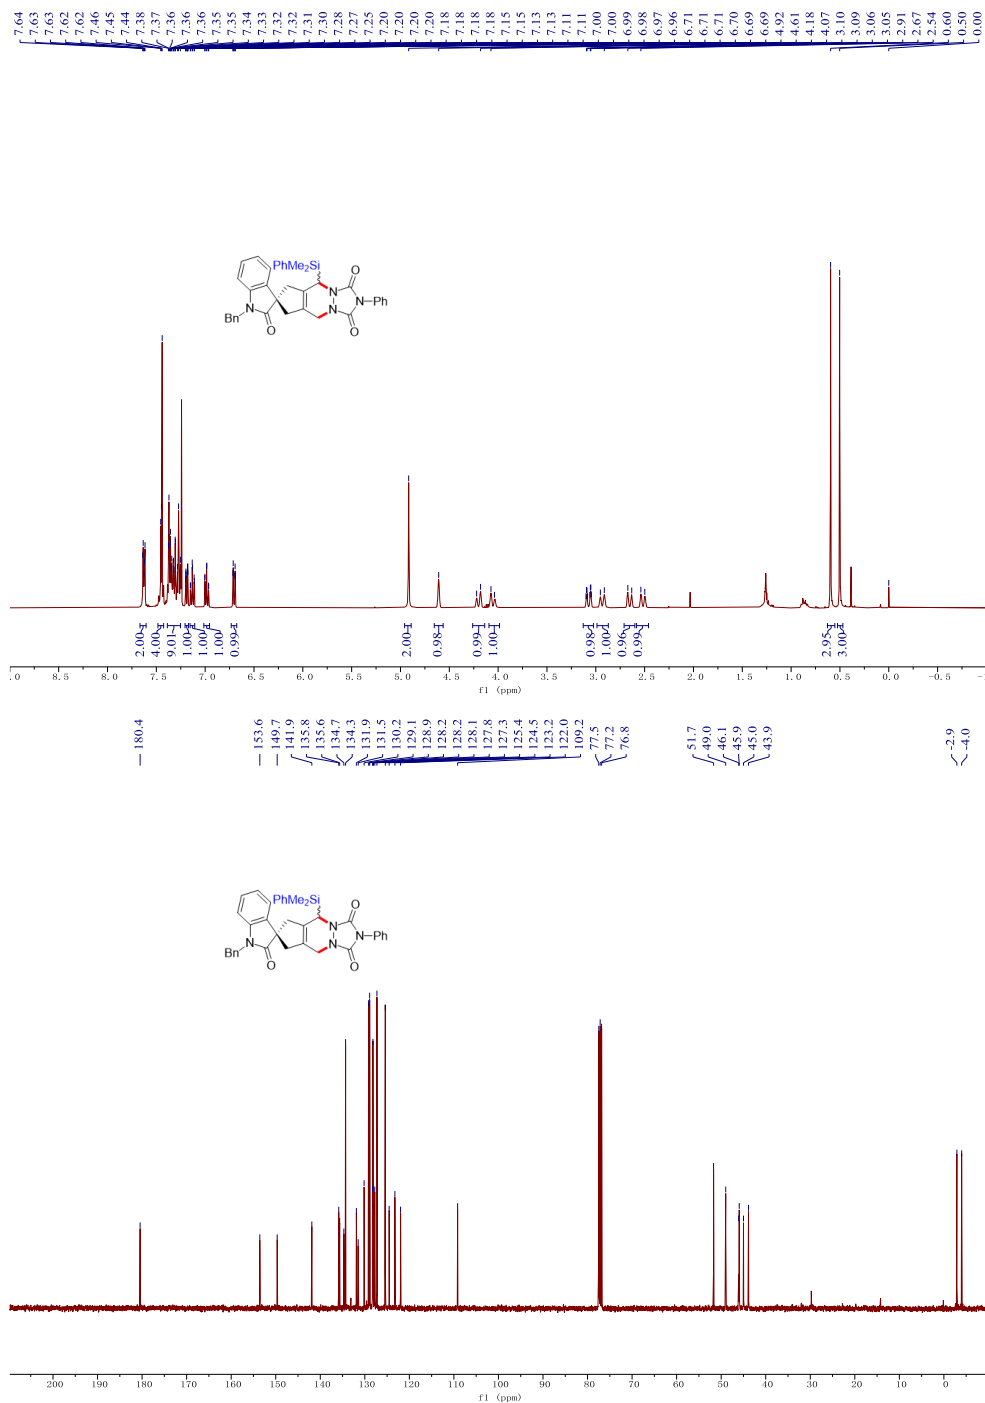

**6a (minor):** (92% ee),  $[\alpha]_D^{20} +58.1^\circ$  (*c* 2.56, CHCl<sub>3</sub>)

The enantiomeric excess of **6a (minor)** was determined by chiral HPLC analysis on IB column. Conditions: hexane/isopropanol = 75:25, flow rate = 0.6 mL/min, T = 25 °C, UV-Vis detection at  $\lambda = 230$  nm,  $t_{R1} = 21.8$  min (major),  $t_{R2} = 26.9$  min (minor).

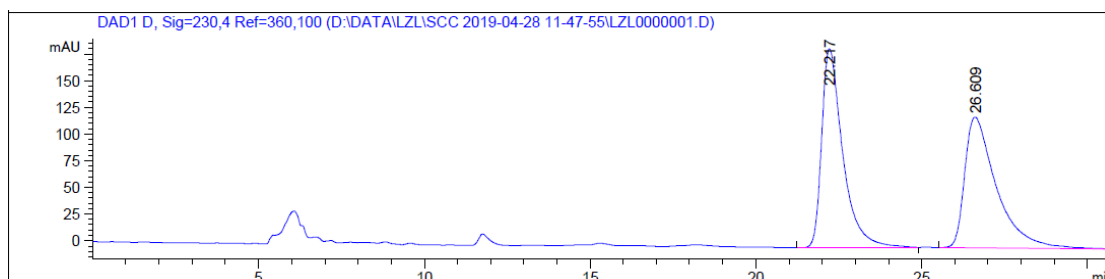

Signal 4: DAD1 D, Sig=230,4 Ref=360,100

| Peak # | RetTime [min] | Type | Width [min] | Area [mAU*s] | Height [mAU] | Area %  |
|--------|---------------|------|-------------|--------------|--------------|---------|
| 1      | 22.217        | BB   | 0.6568      | 8219.46484   | 186.26212    | 50.2408 |
| 2      | 26.609        | BBA  | 0.9756      | 8140.66406   | 122.44772    | 49.7592 |

Totals : 1.63601e4 308.70983

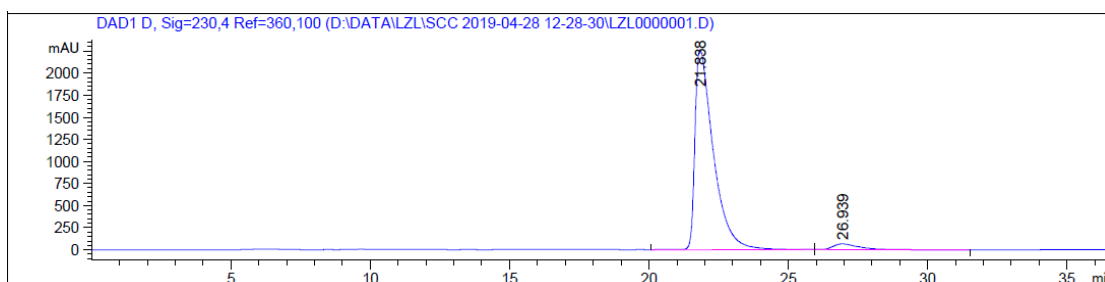

Signal 4: DAD1 D, Sig=230,4 Ref=360,100

| Peak # | RetTime [min] | Type | Width [min] | Area [mAU*s] | Height [mAU] | Area %  |
|--------|---------------|------|-------------|--------------|--------------|---------|
| 1      | 21.838        | BB   | 0.6780      | 1.03869e5    | 2260.74707   | 95.9719 |
| 2      | 26.939        | BB   | 0.9997      | 4359.59229   | 64.57137     | 4.0281  |

Totals : 1.08229e5 2325.31844



## V. Crystal Data for Compound 4i

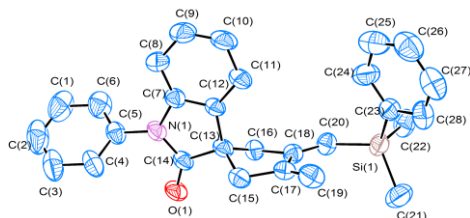

|                                             |                                                               |
|---------------------------------------------|---------------------------------------------------------------|
| Empirical formula                           | C <sub>28</sub> H <sub>27</sub> NOSi                          |
| Formula weight                              | 421.59                                                        |
| Temperature/K                               | 293(2)                                                        |
| Crystal system                              | orthorhombic                                                  |
| Space group                                 | P212121                                                       |
| a/Å                                         | 9.08856(12)                                                   |
| b/Å                                         | 12.68486(17)                                                  |
| c/Å                                         | 21.2932(3)                                                    |
| α/°                                         | 90                                                            |
| β/°                                         | 90                                                            |
| γ/°                                         | 90                                                            |
| Volume/Å <sup>3</sup>                       | 2454.84(6)                                                    |
| Z                                           | 4                                                             |
| ρ <sub>calc</sub> /cm <sup>3</sup>          | 1.141                                                         |
| μ/mm <sup>-1</sup>                          | 0.975                                                         |
| F(000)                                      | 896.0                                                         |
| Crystal size/mm <sup>3</sup>                | 0.12 × 0.09 × 0.08                                            |
| Radiation                                   | CuKα (λ = 1.54184)                                            |
| 2θ range for data collection/°              | 8.114 to 147.77                                               |
| Index ranges                                | -11 ≤ h ≤ 7, -15 ≤ k ≤ 15, -26 ≤ l ≤ 26                       |
| Reflections collected                       | 13241                                                         |
| Independent reflections                     | 4734 [R <sub>int</sub> = 0.0213, R <sub>sigma</sub> = 0.0177] |
| Data/restraints/parameters                  | 4734/13/294                                                   |
| Goodness-of-fit on F <sup>2</sup>           | 1.040                                                         |
| Final R indexes [I >= 2σ (I)]               | R <sub>1</sub> = 0.0409, wR <sub>2</sub> = 0.1168             |
| Final R indexes [all data]                  | R <sub>1</sub> = 0.0434, wR <sub>2</sub> = 0.1205             |
| Largest diff. peak/hole / e Å <sup>-3</sup> | 0.32/-0.28                                                    |
| Flack parameter                             | 0.017(12)                                                     |

## VI. References

1. Zhang, Q.; Liang, Q.-J.; Xu, J.-L.; Xu, Y.-H.; Loh, T.-P. Palladium-Catalyzed Silaborative Carbocyclizations of 1,6-Diynes. *Chem. Commun.* **2018**, *54*, 2357–2360.
2. Matsumoto, US Patent No. US6525081 (2003).
